# Supplementary material for: Oxidative dual C–H selenation of imidazoheterocycles with ethers or alkanes using selenium powder via a radical pathway
Source: Royal Society of Chemistry journal article supplement (doi:10.1039/c9qo00198k), 2019-01-01

Oxidative dual C–H selenation of imidazoheterocycles with ethers or  
alkanes using selenium powder via a radical pathway

Tao Guo,<sup>\*a</sup> Xu-Ning Wei,<sup>a</sup> Yu Liu,<sup>a</sup> Pan-Ke Zhang<sup>b</sup> and Yun-Hui Zhao<sup>\*c</sup>

<sup>a</sup> *College of Chemistry, Chemical and Environmental Engineering, Henan University of  
Technology, Zhengzhou, Henan 450001, PR China*

<sup>b</sup> *College of Chemistry and Molecular Engineering, Zhengzhou University, 100 Kexue Avenue,  
Zhengzhou, Henan 450001, PR China*

<sup>c</sup> *School of Chemistry and Chemical Engineering, Hunan University of Science and  
Technology, Xiangtan, Hunan 411201, PR China*

**Copies of <sup>1</sup>H and <sup>13</sup>C NMR Spectra**

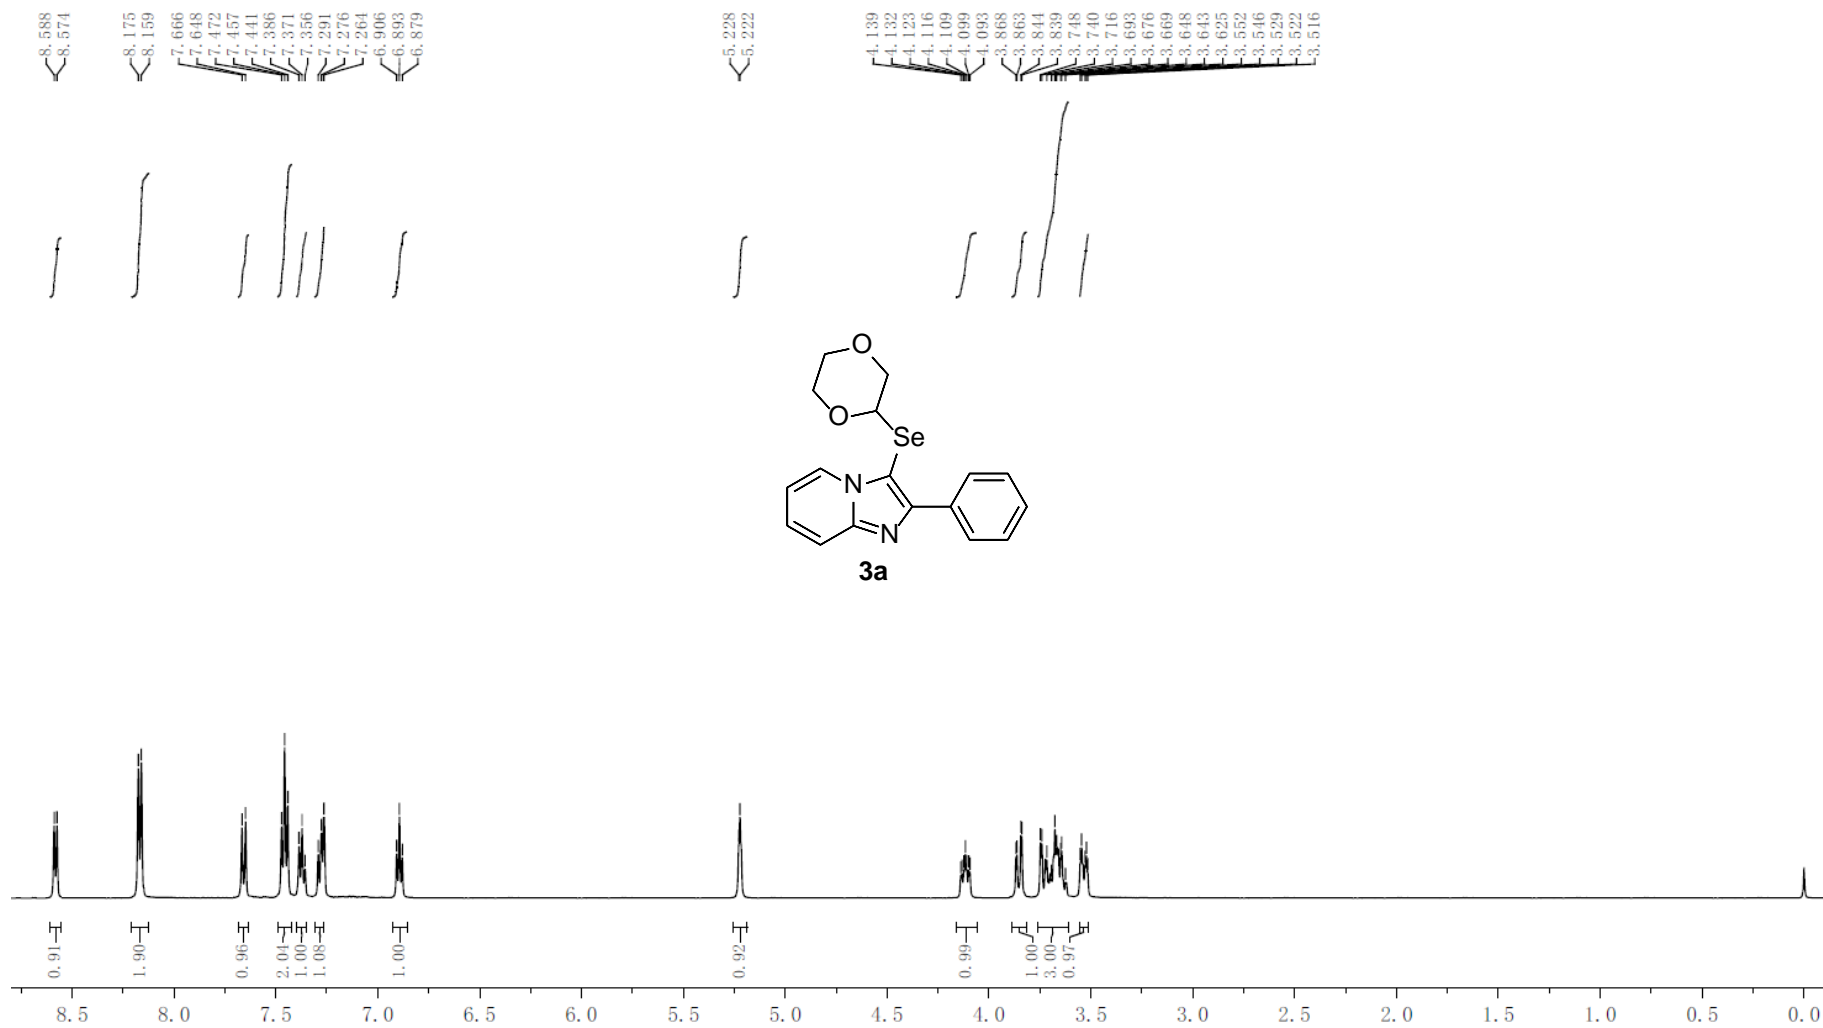

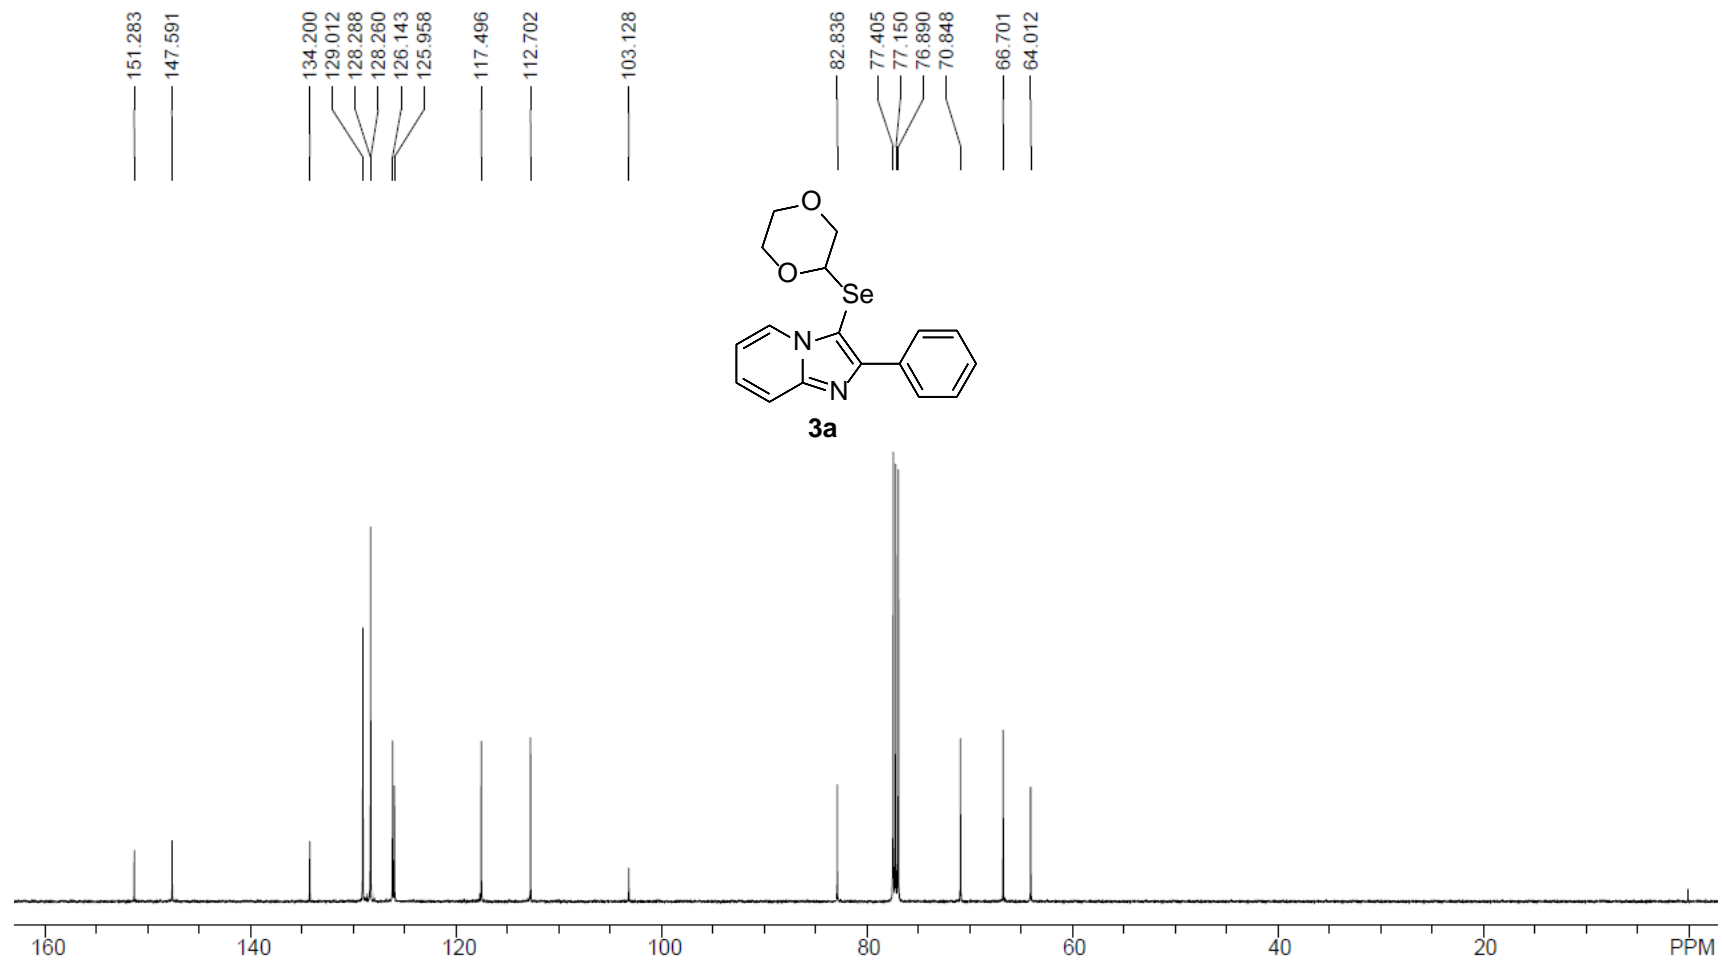

calmix\_180914134019 #33 RT: 0.07 AV: 1 NL: 4.48E8  
T: FTMS + p ESI Full lock ms [150.0000-2000.0000]

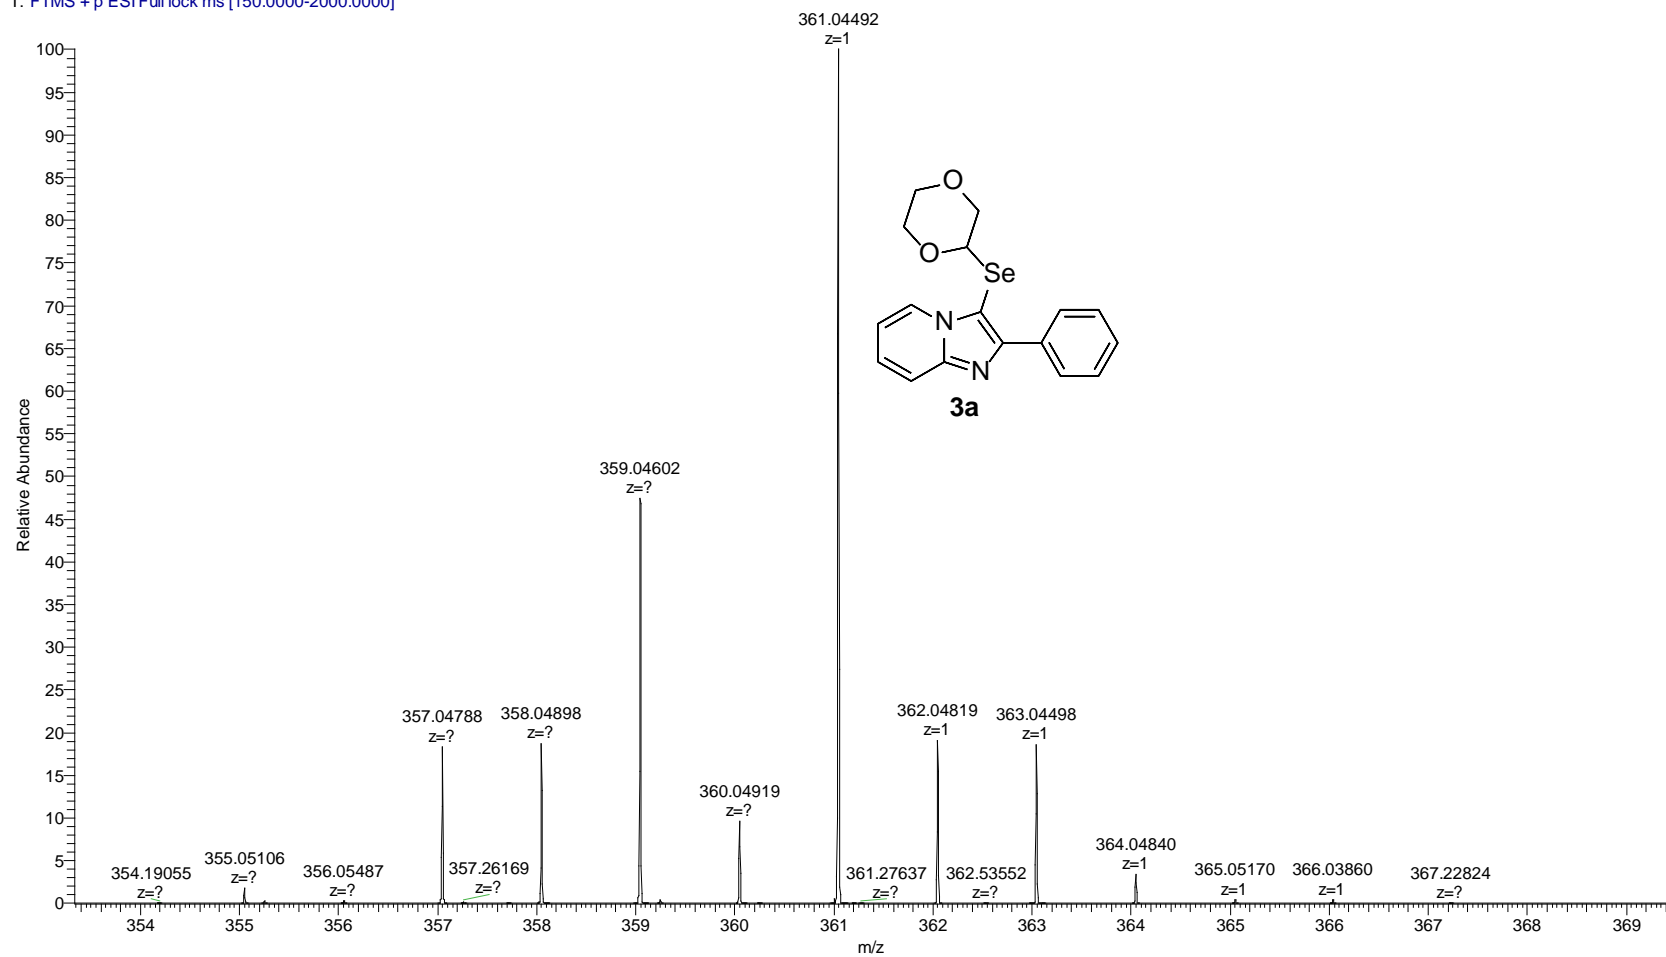

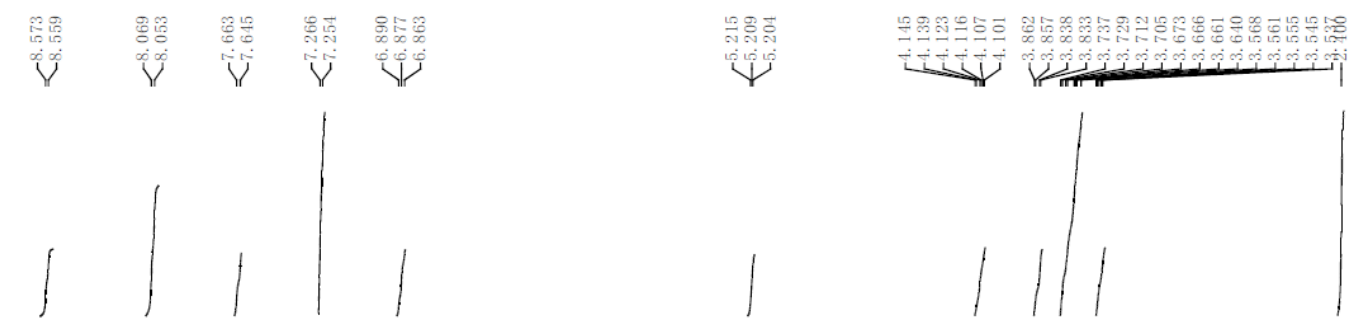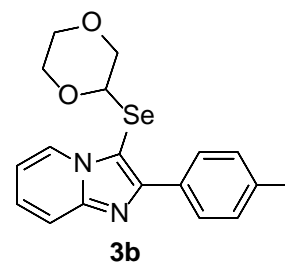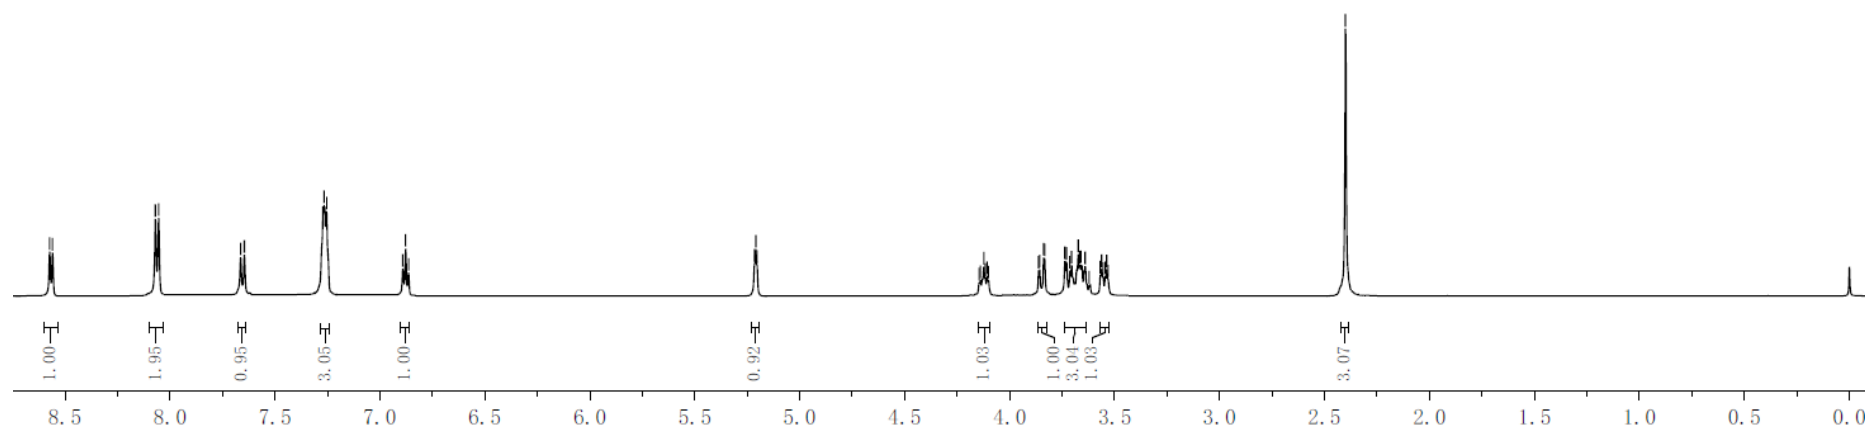

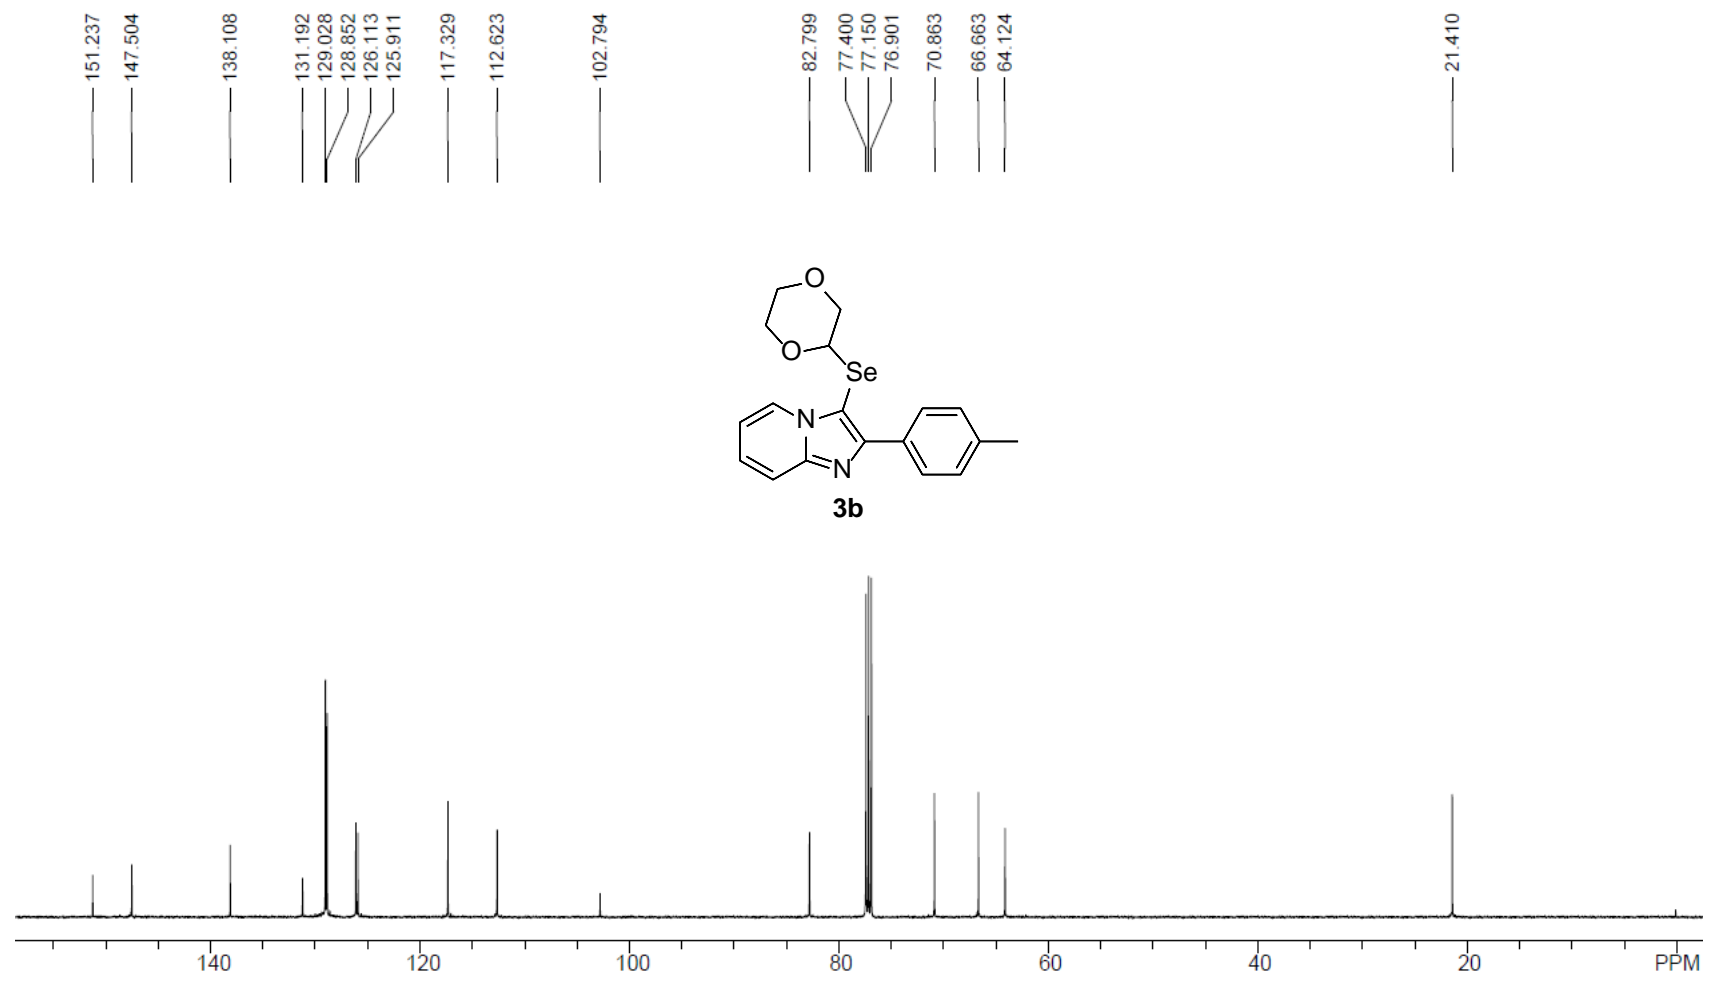

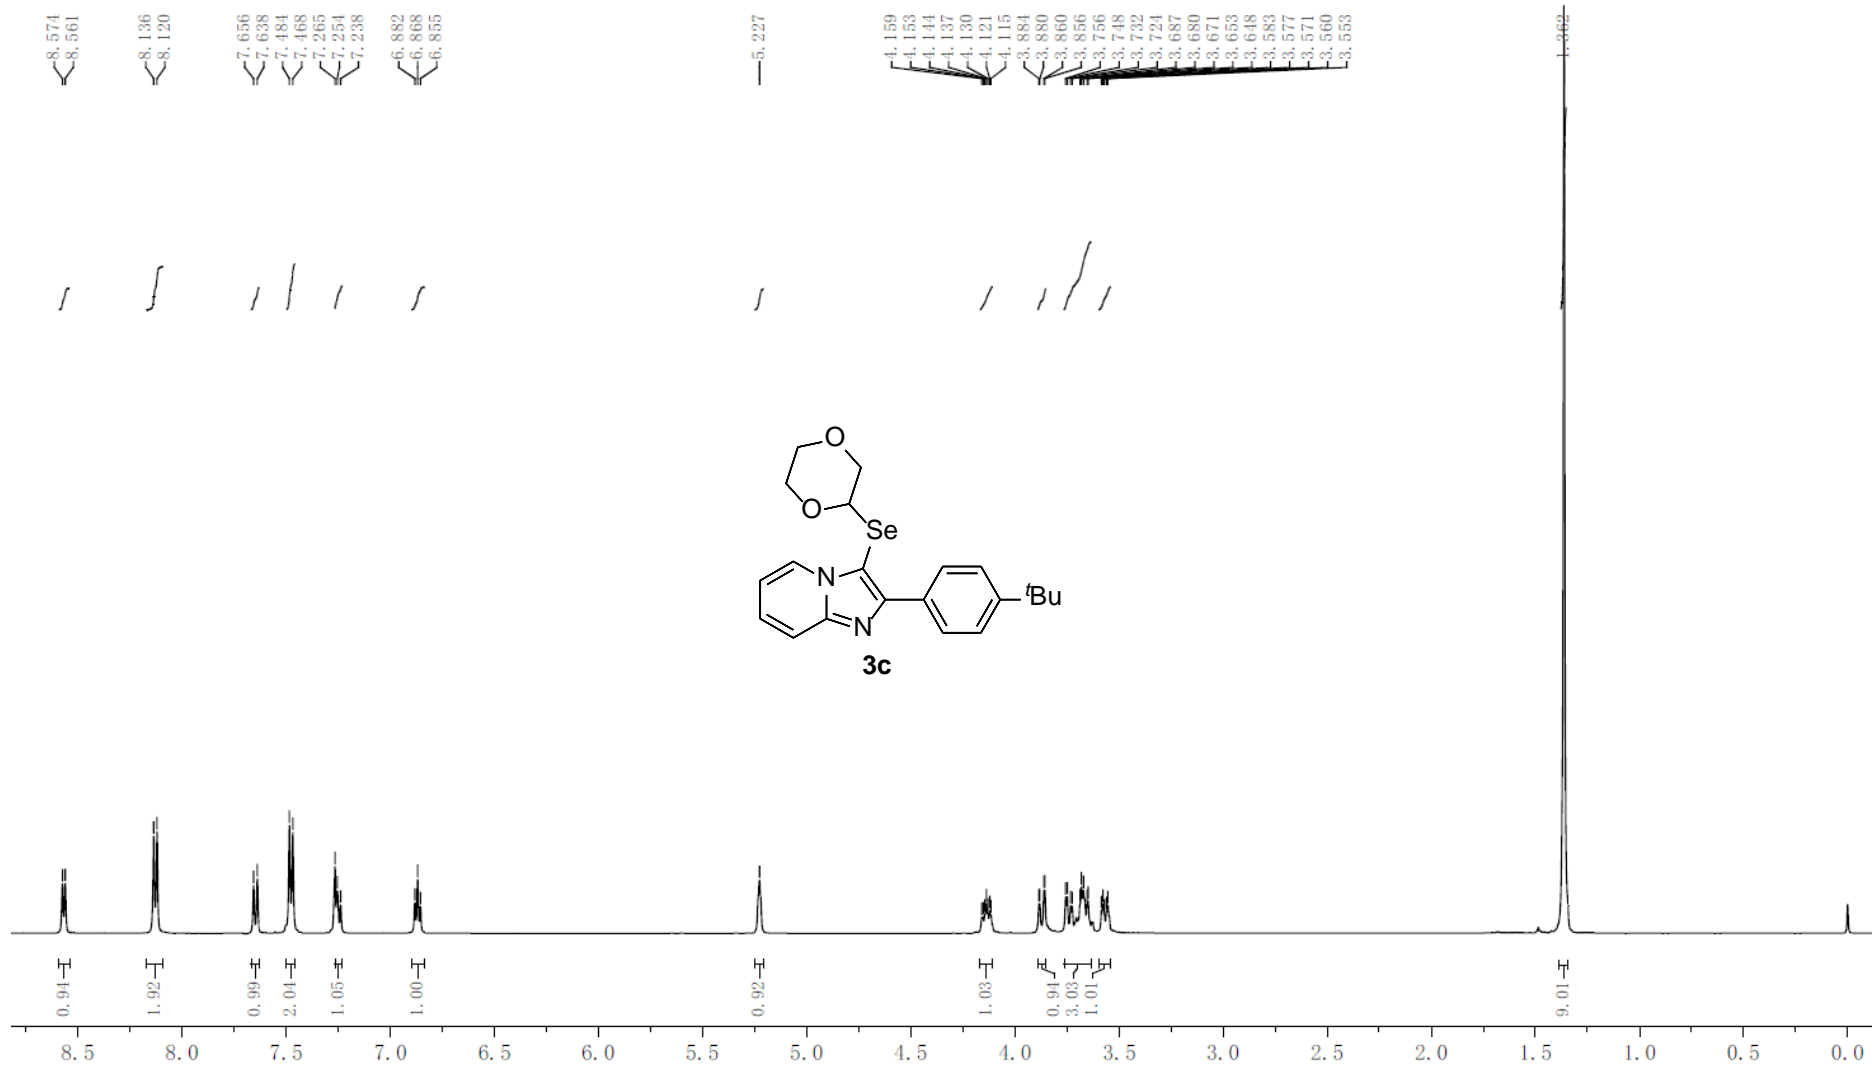

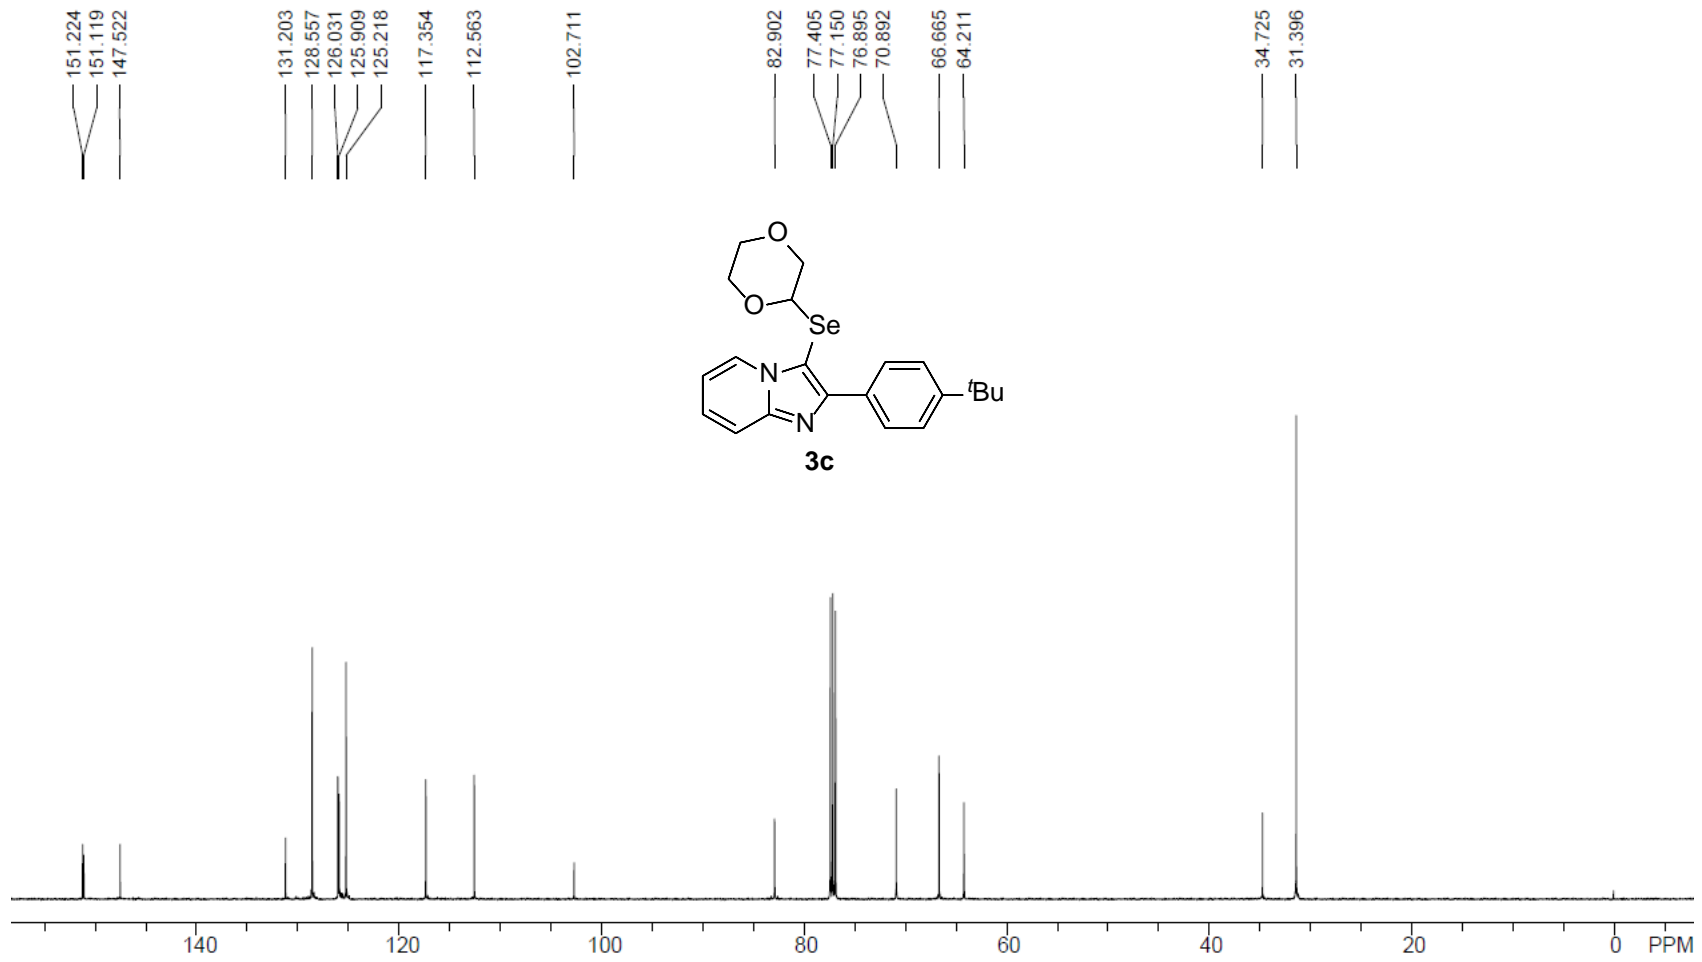



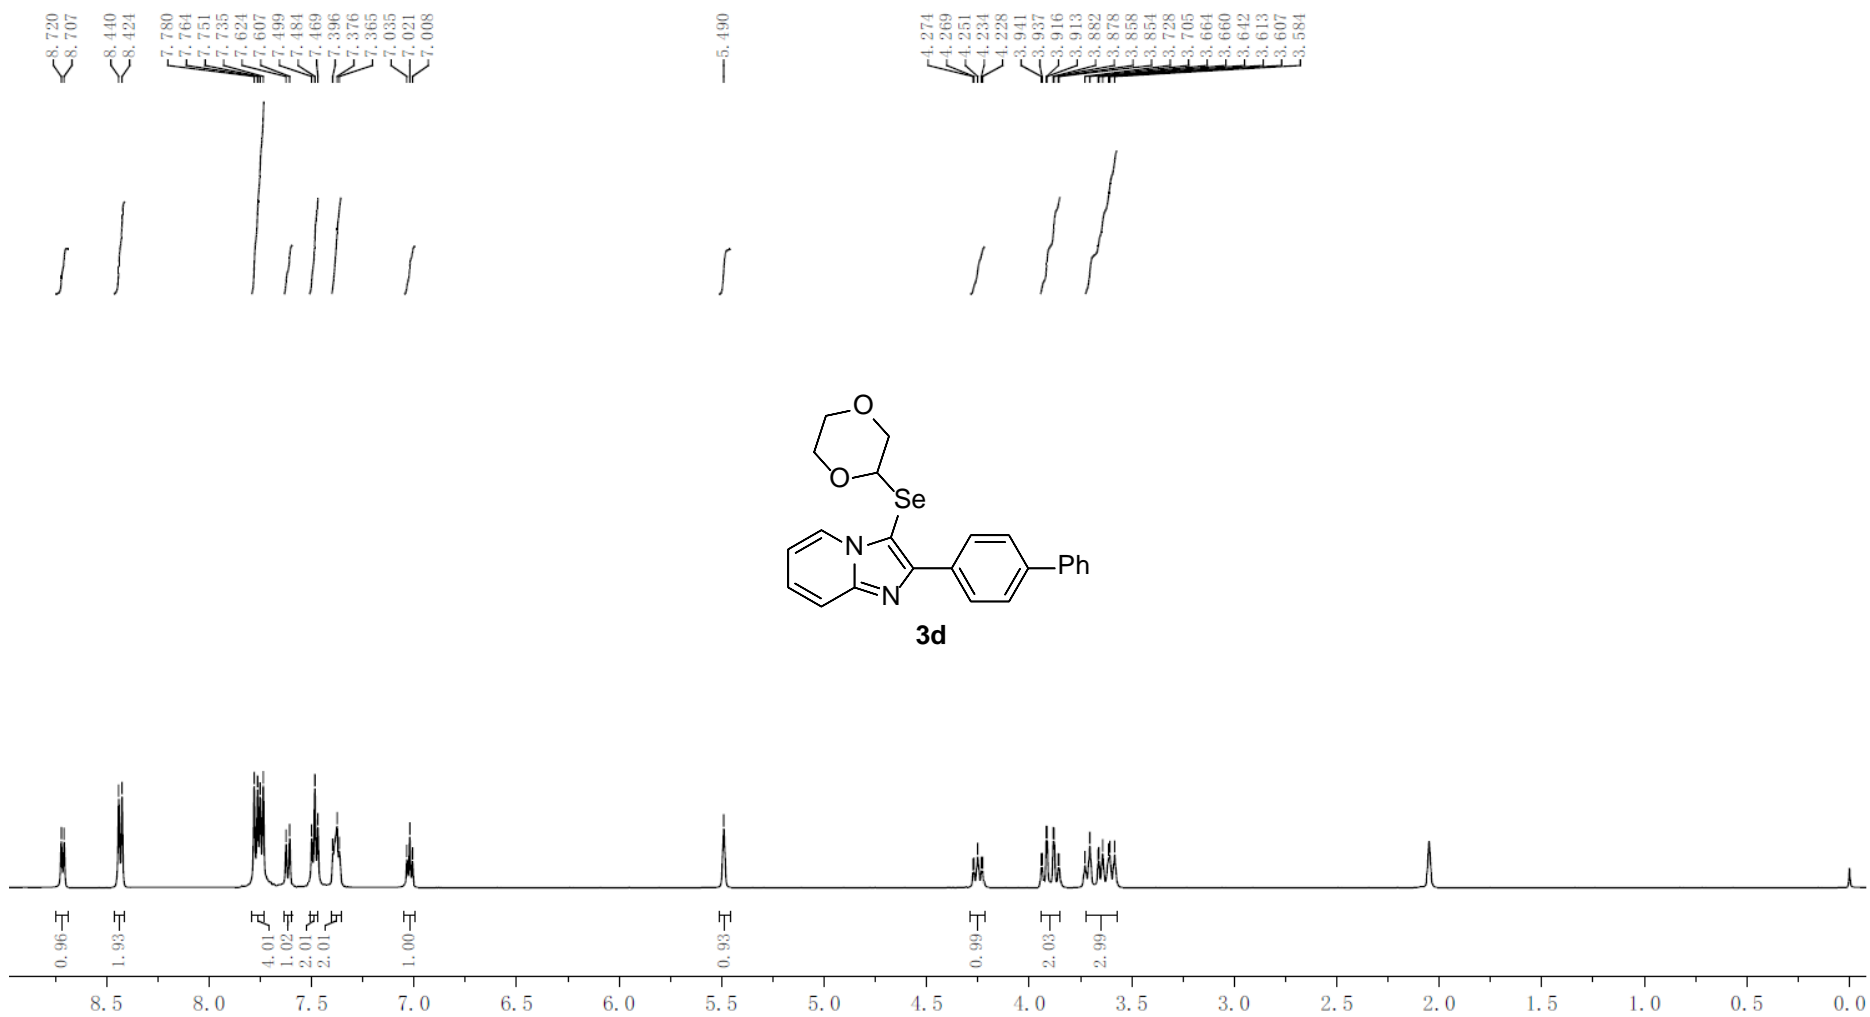

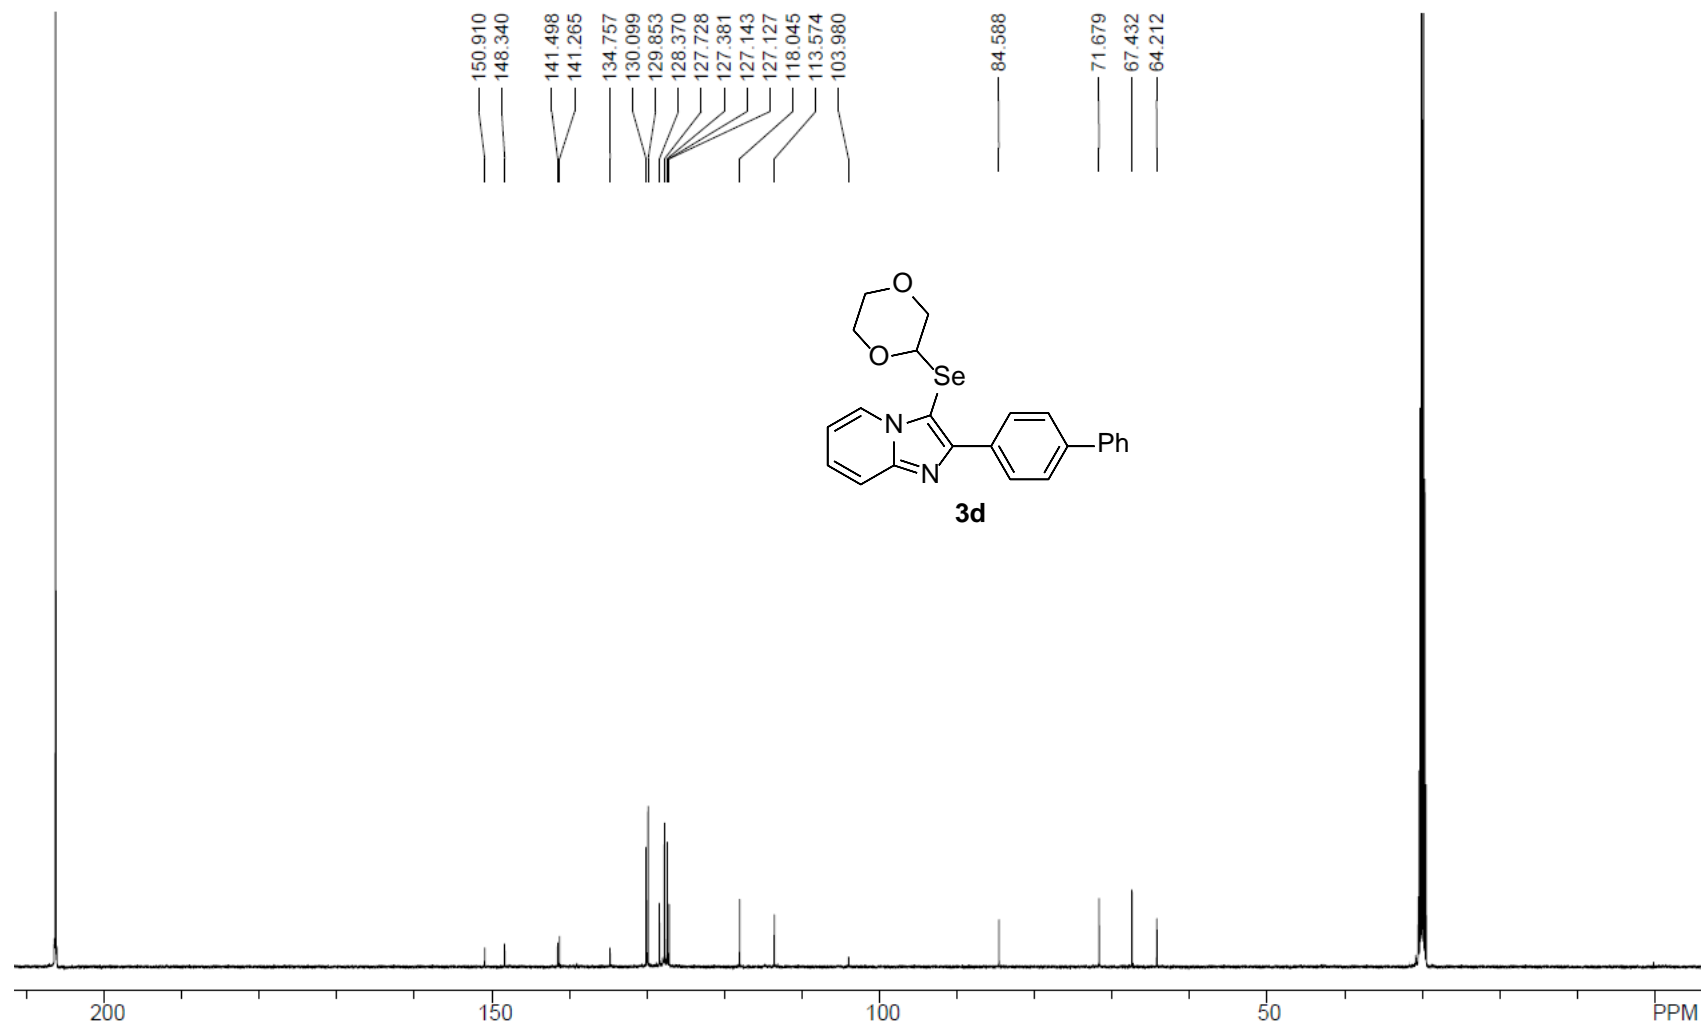

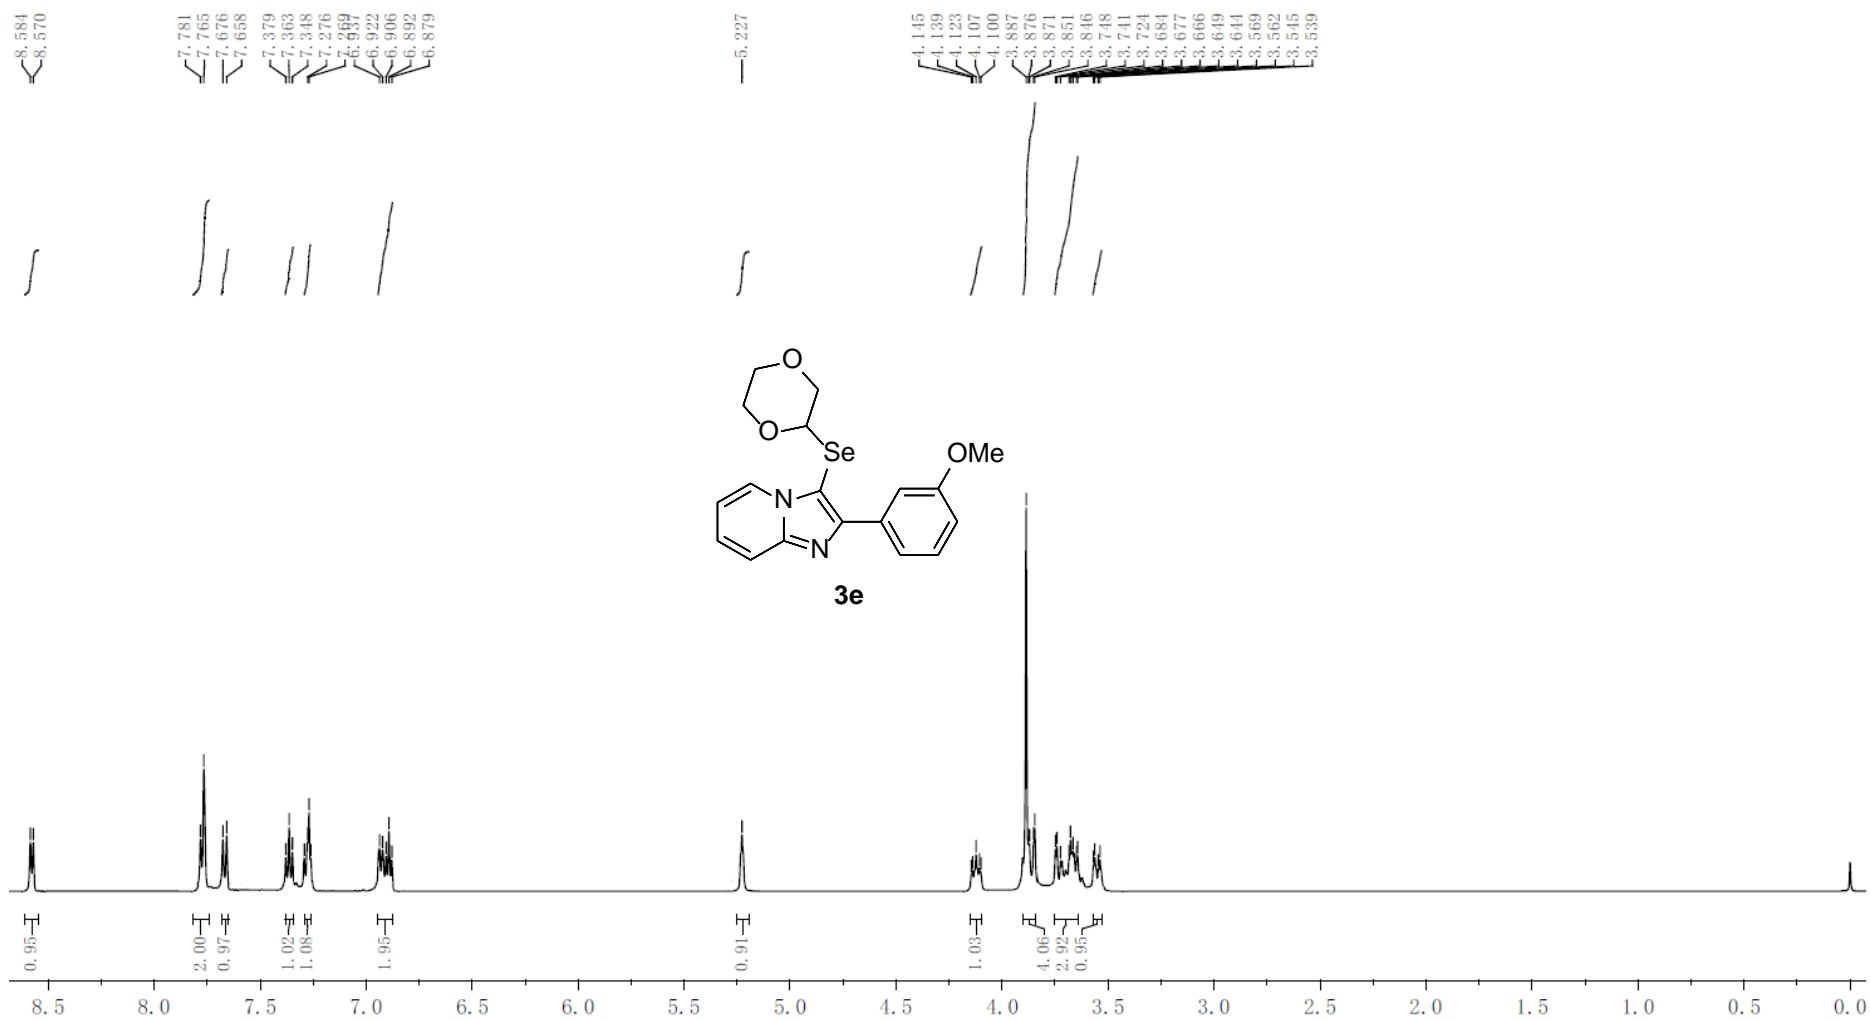

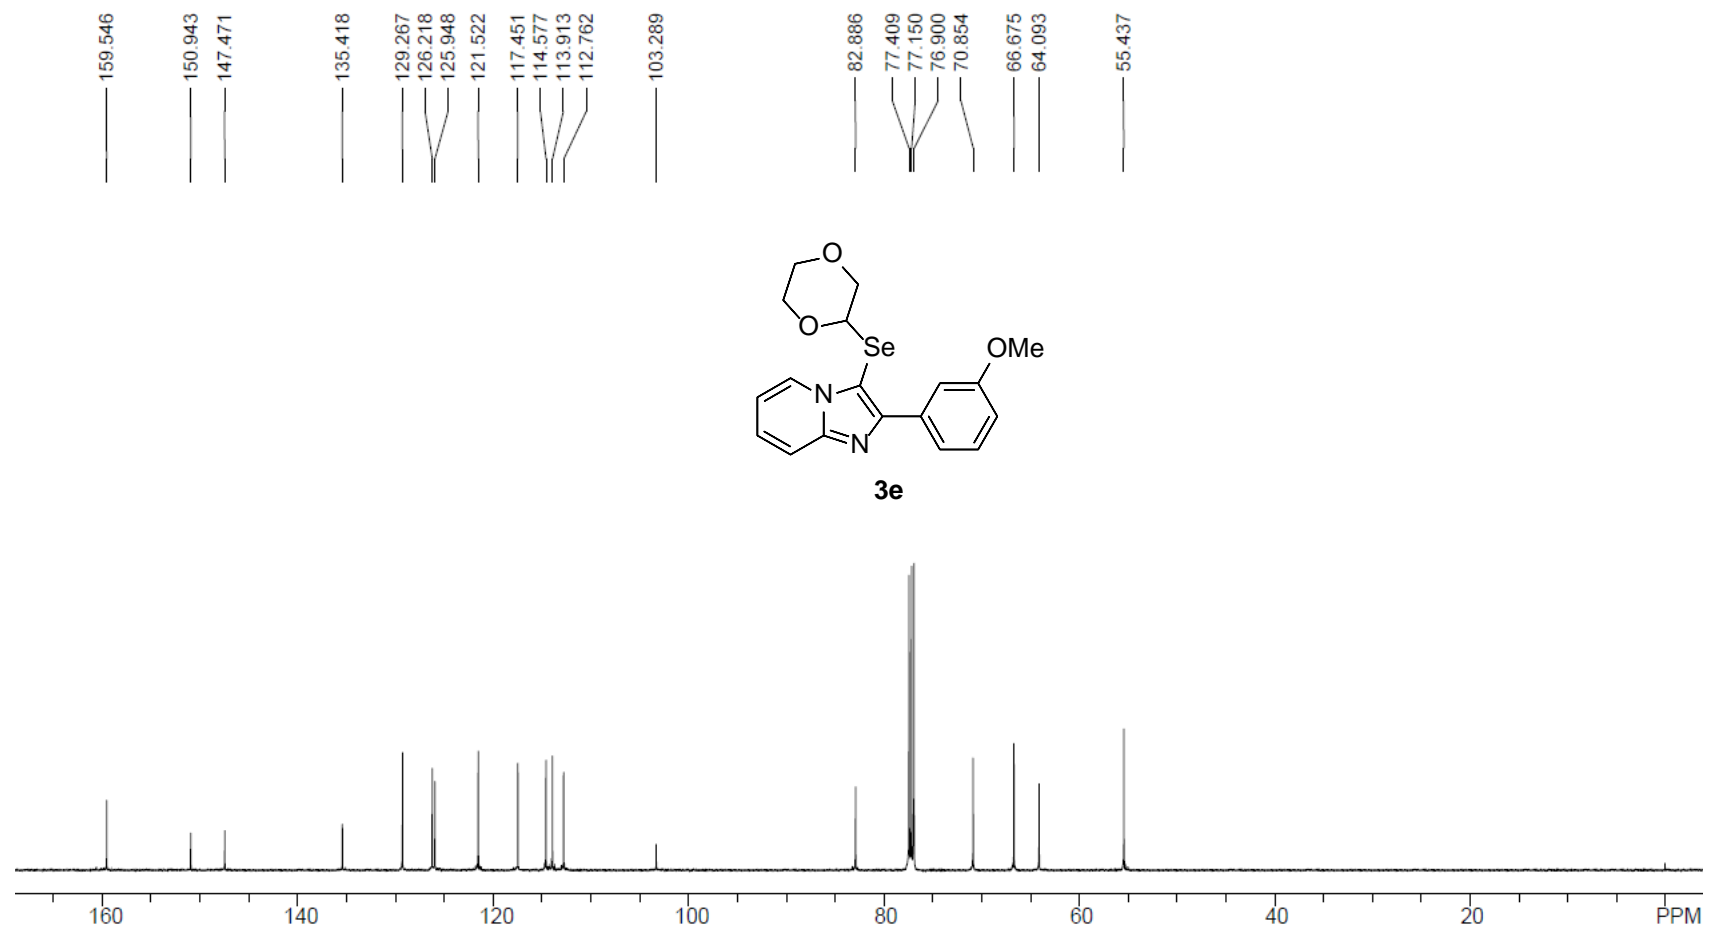

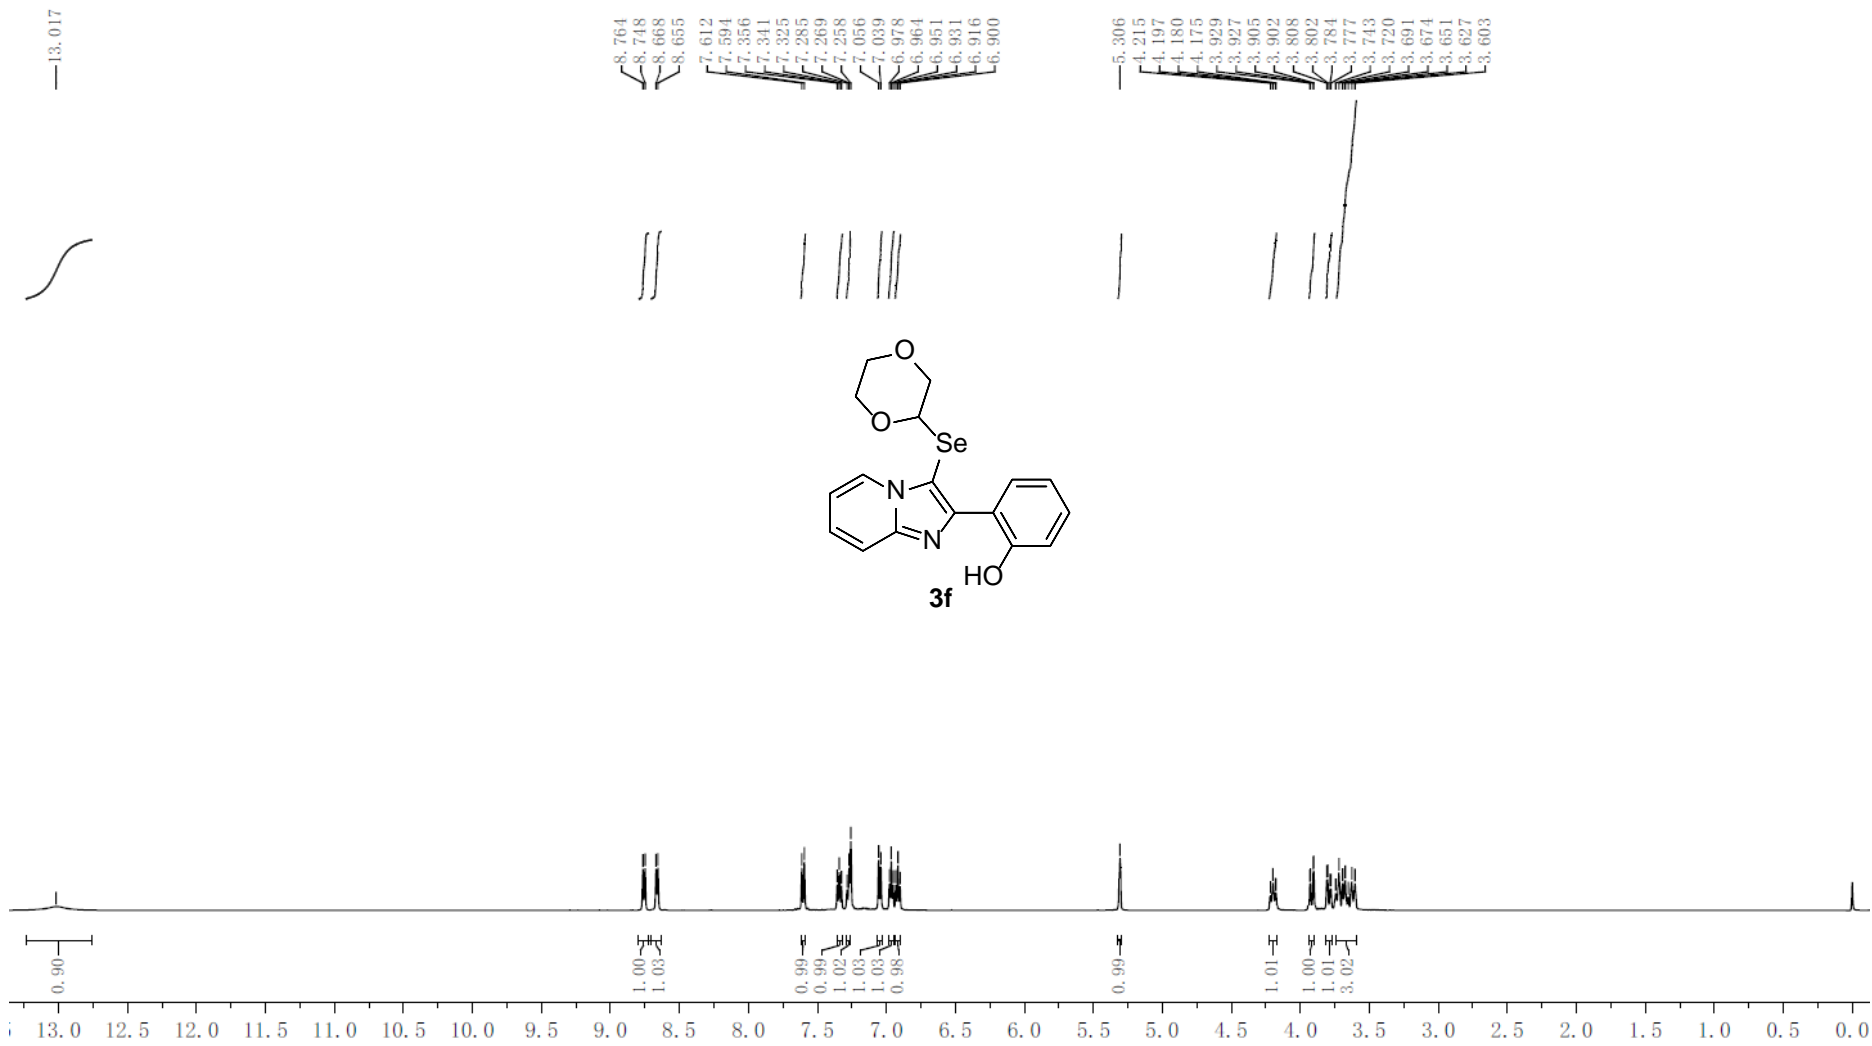

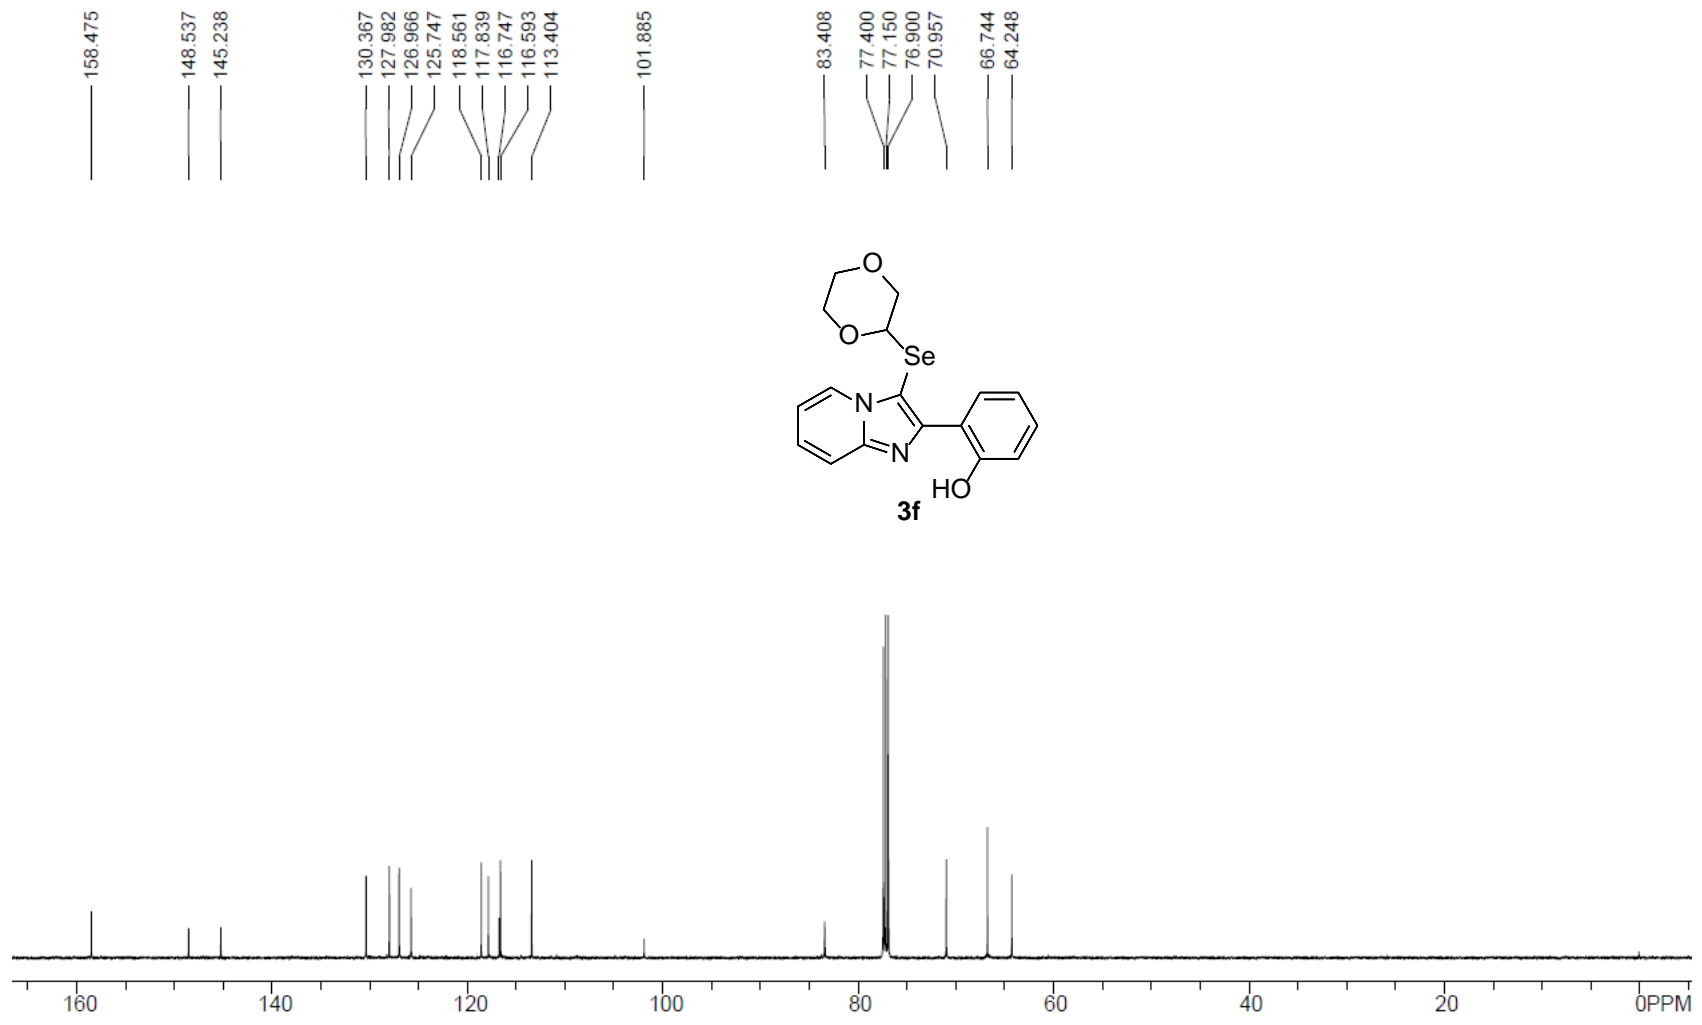

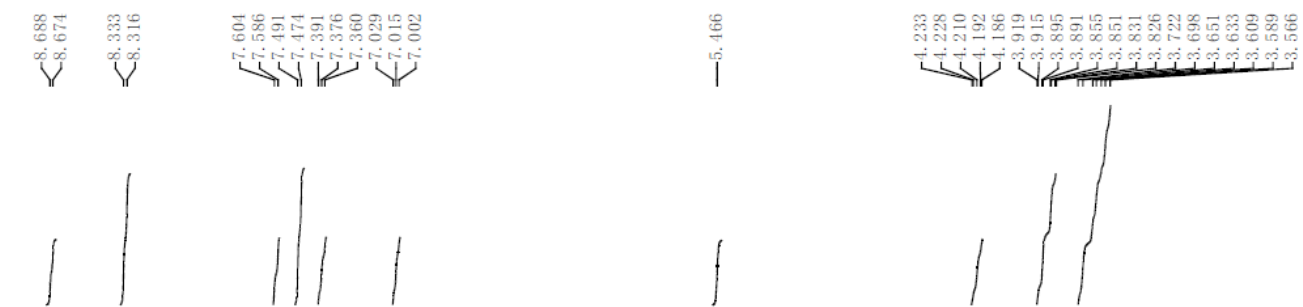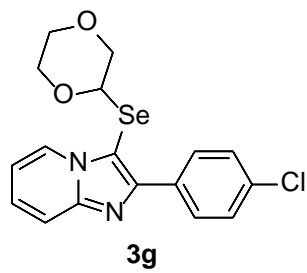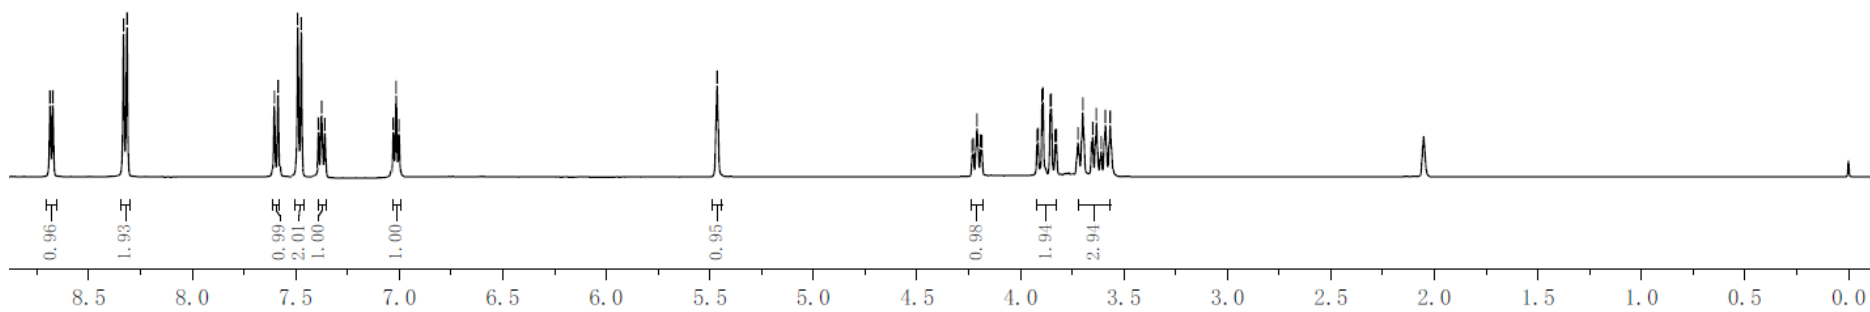

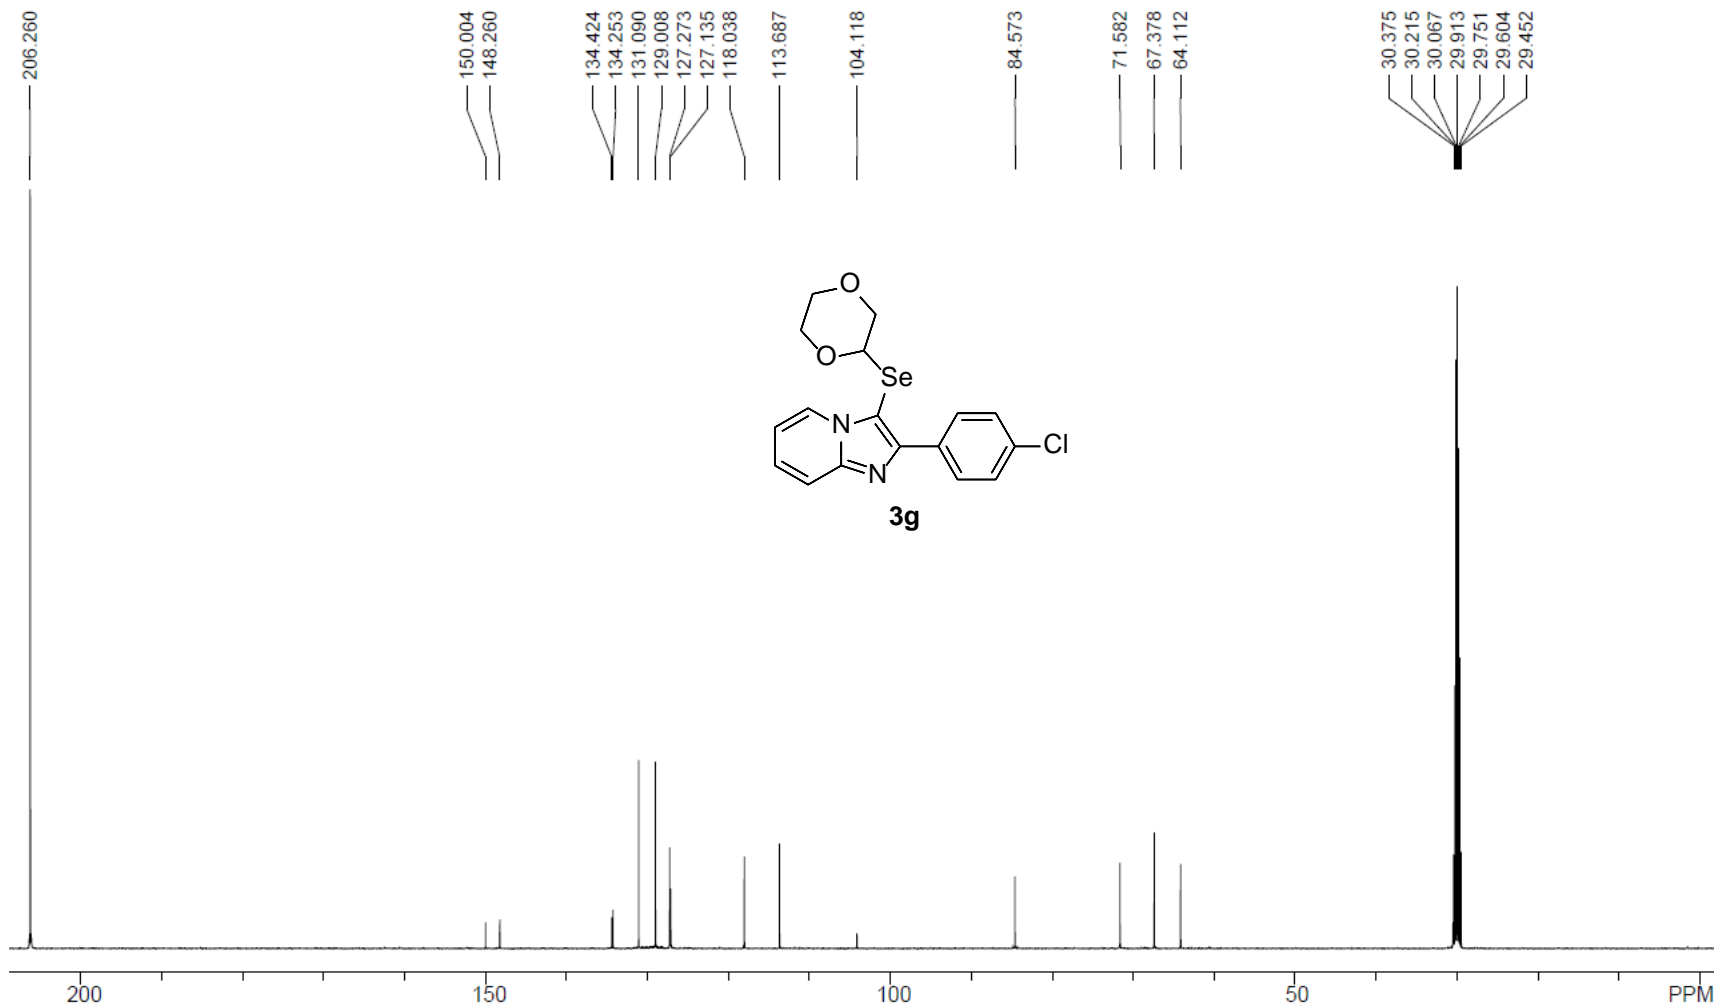



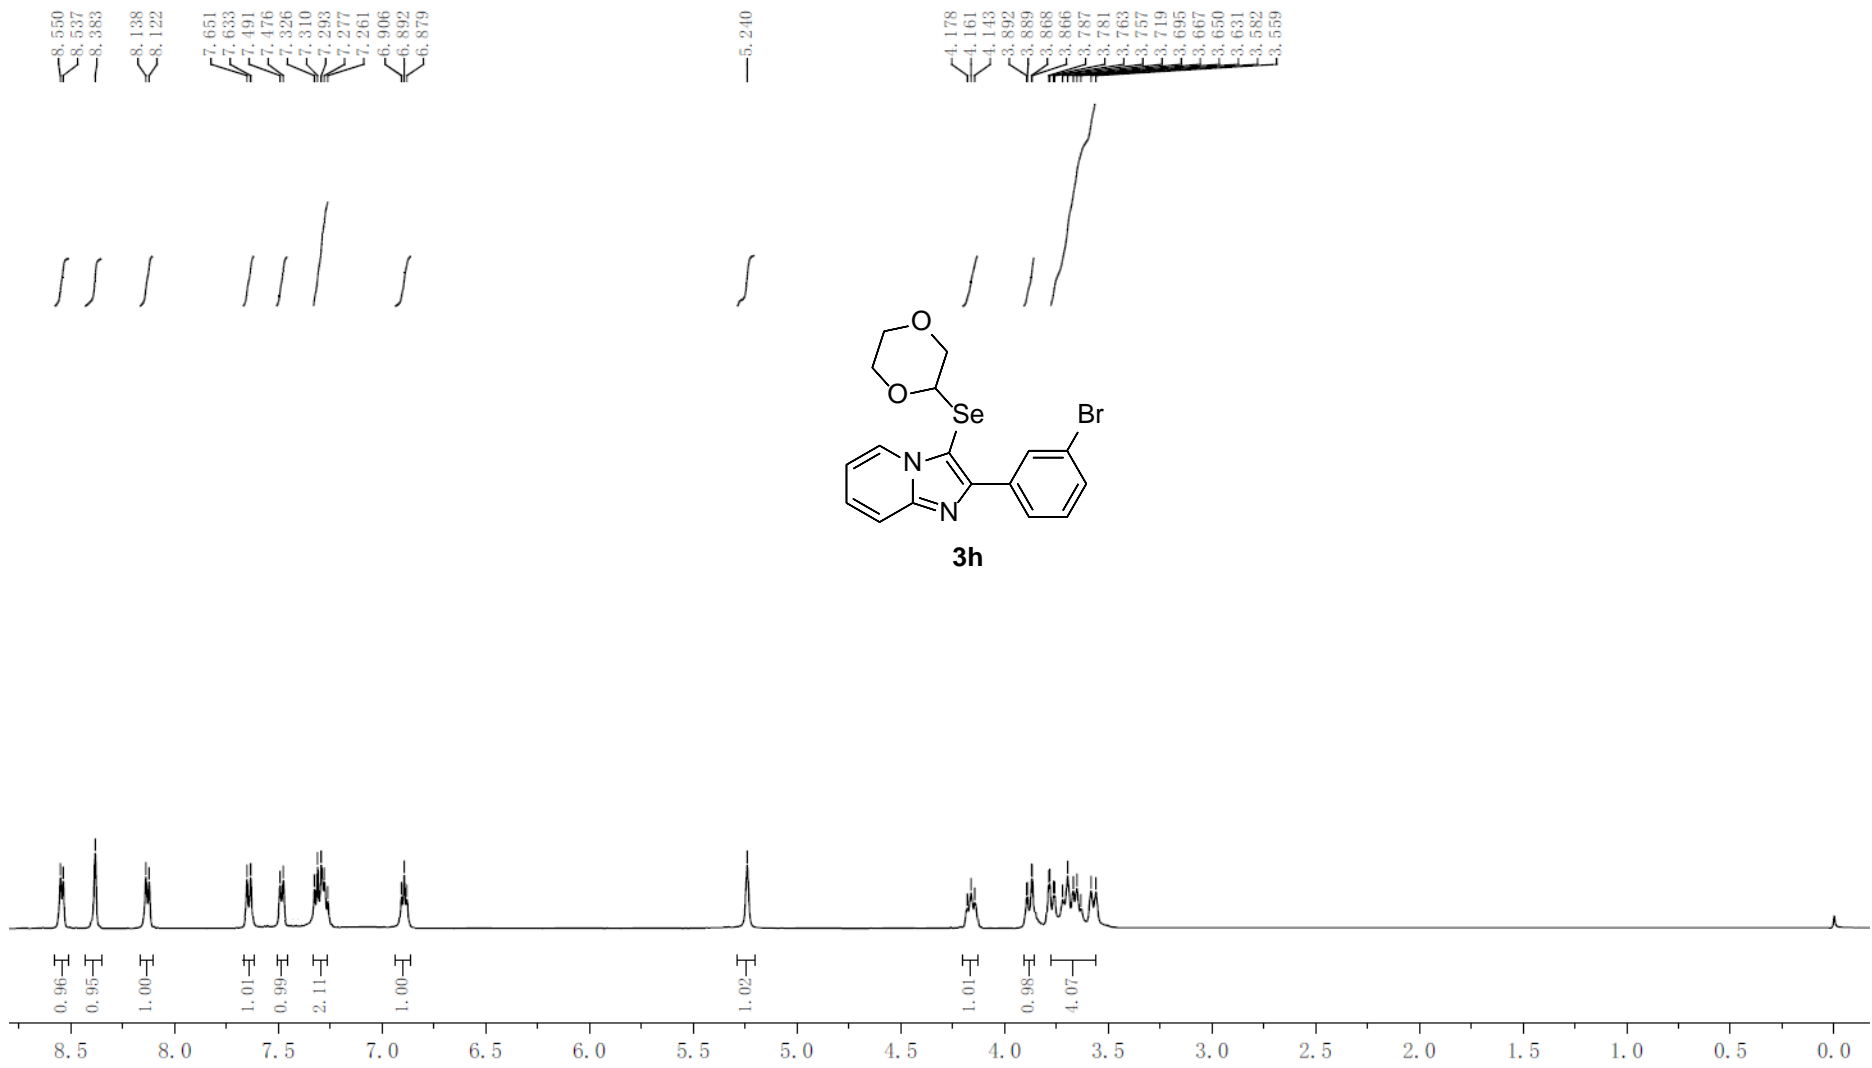

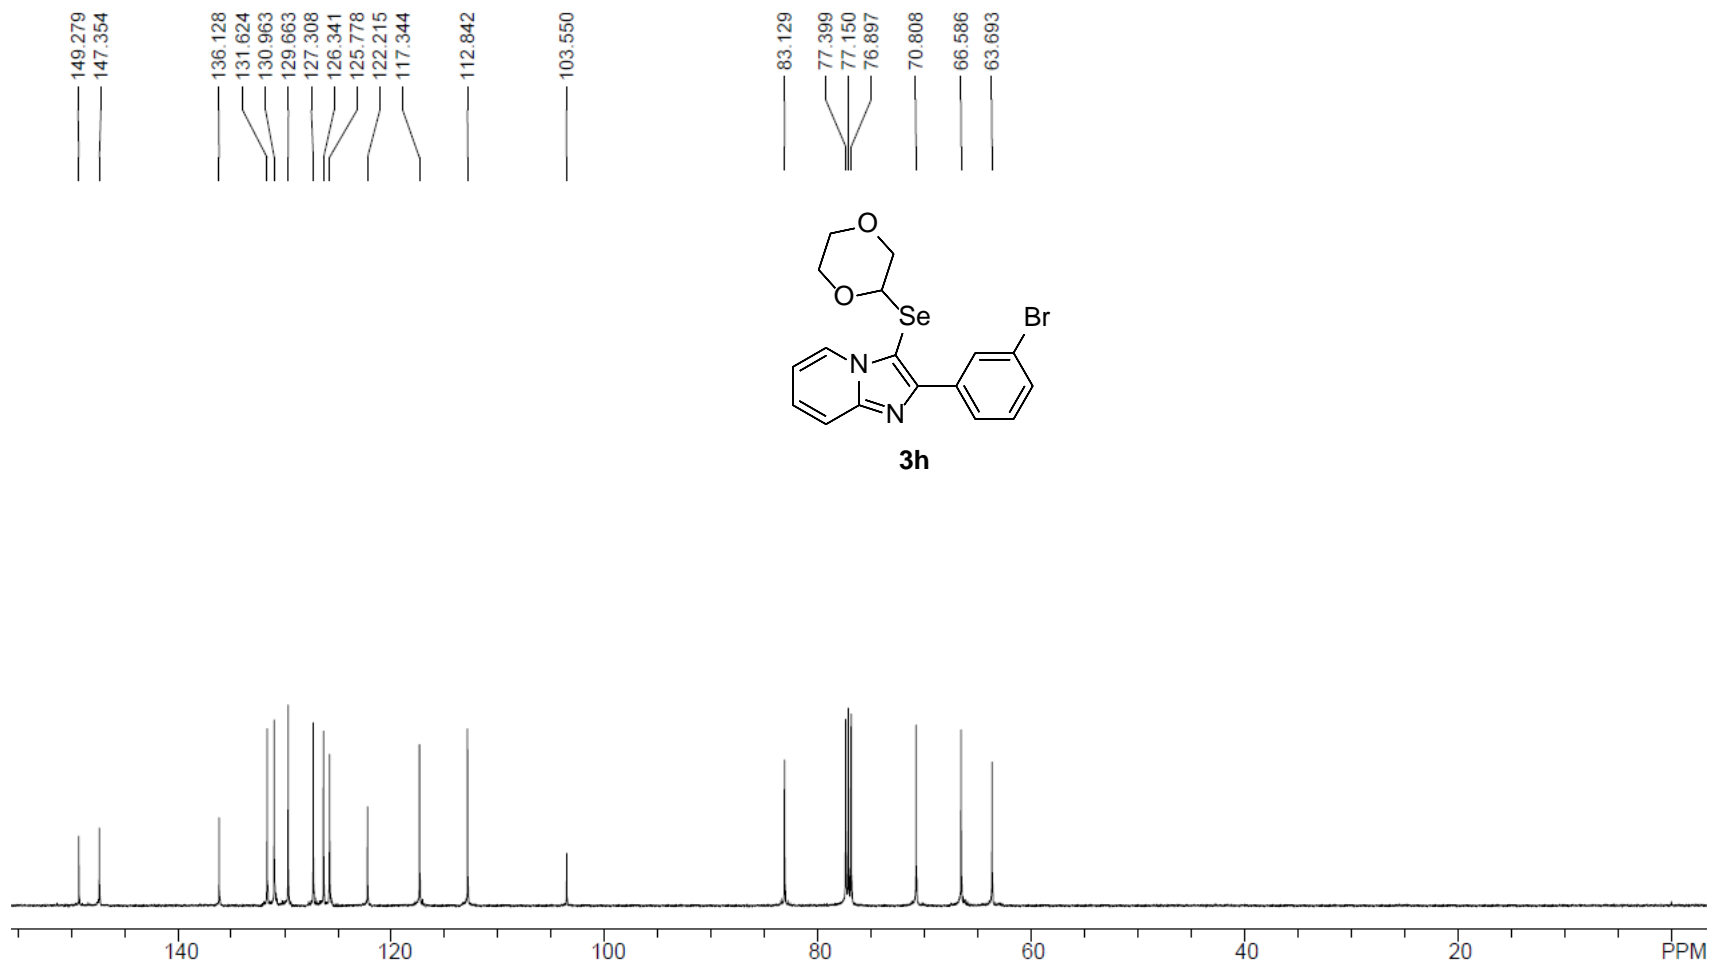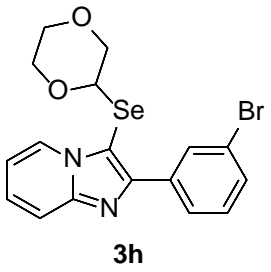

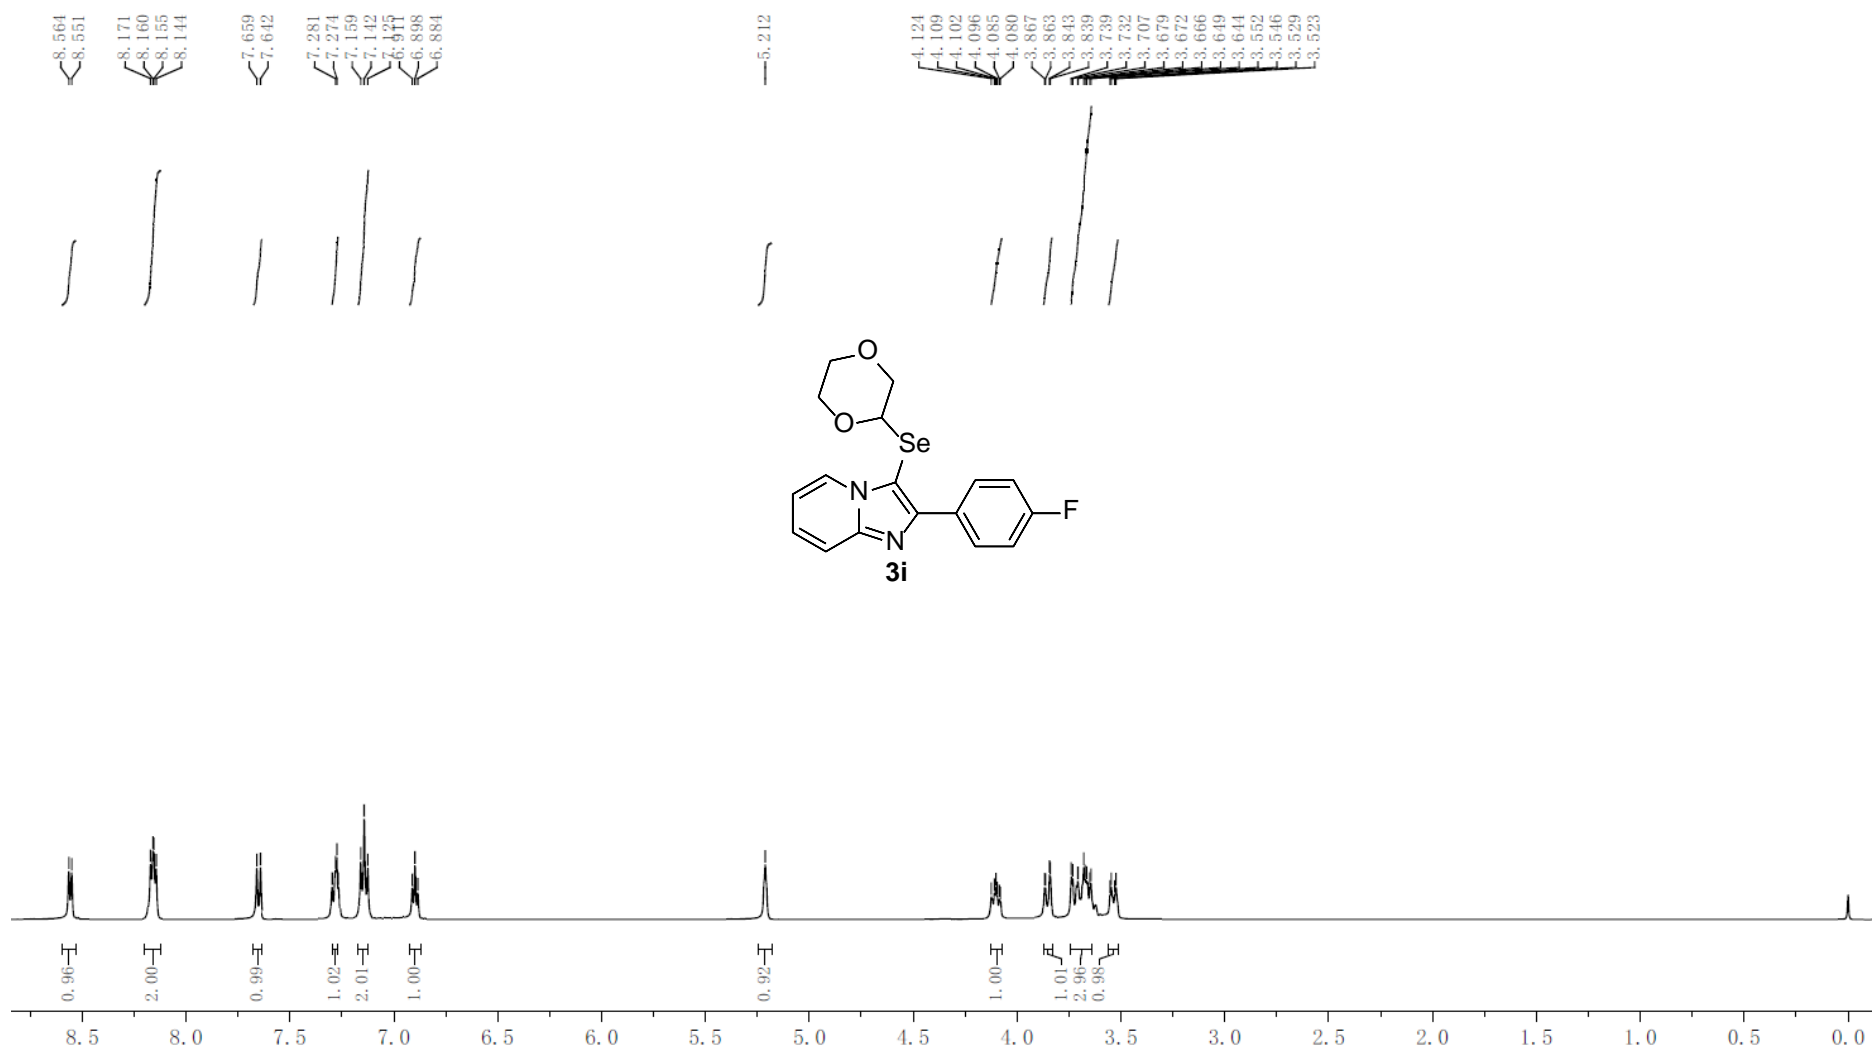

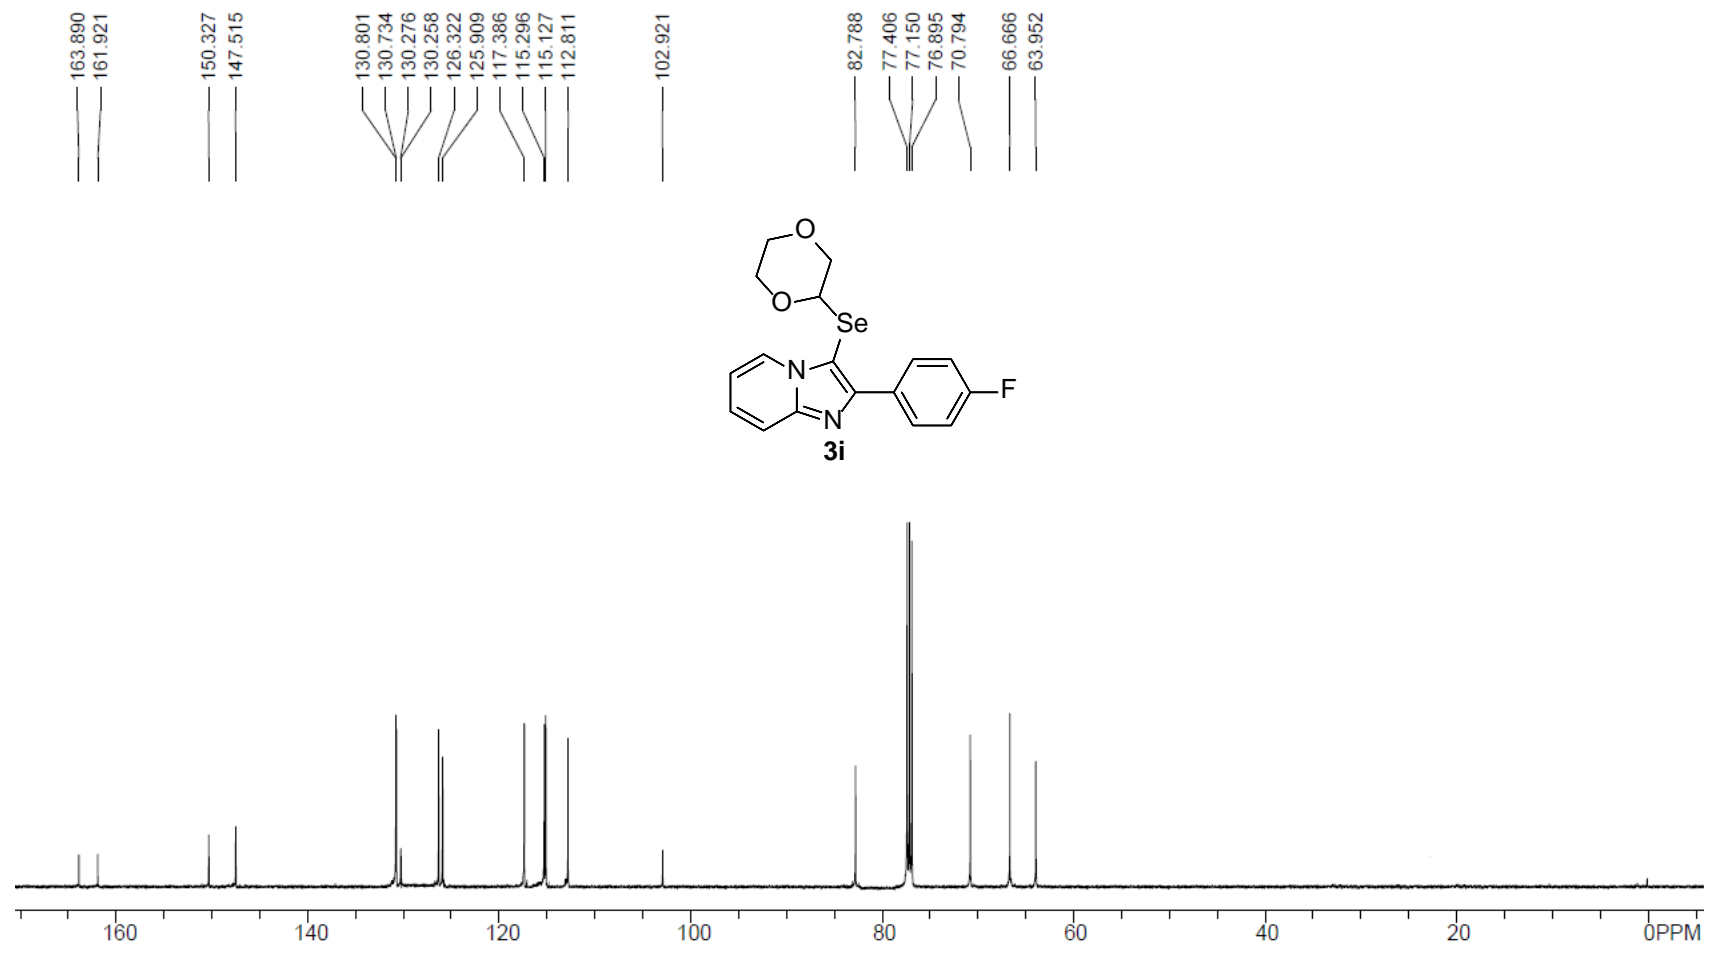

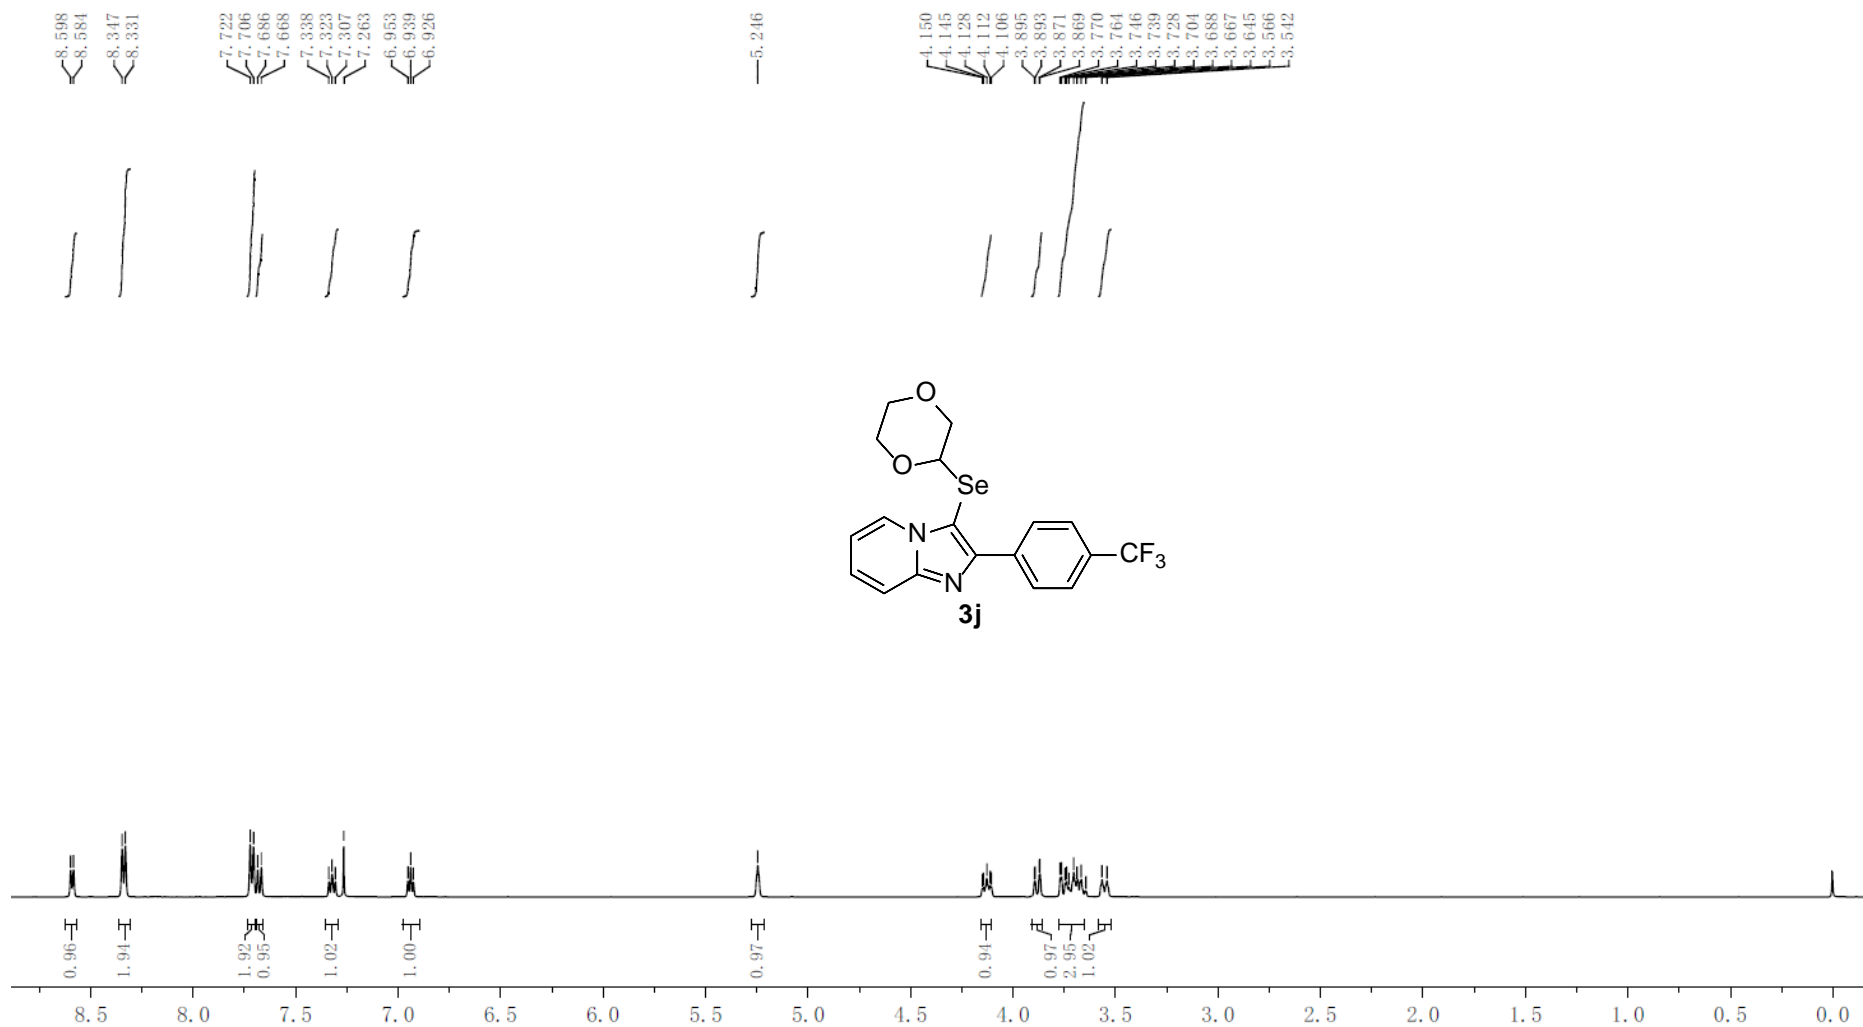

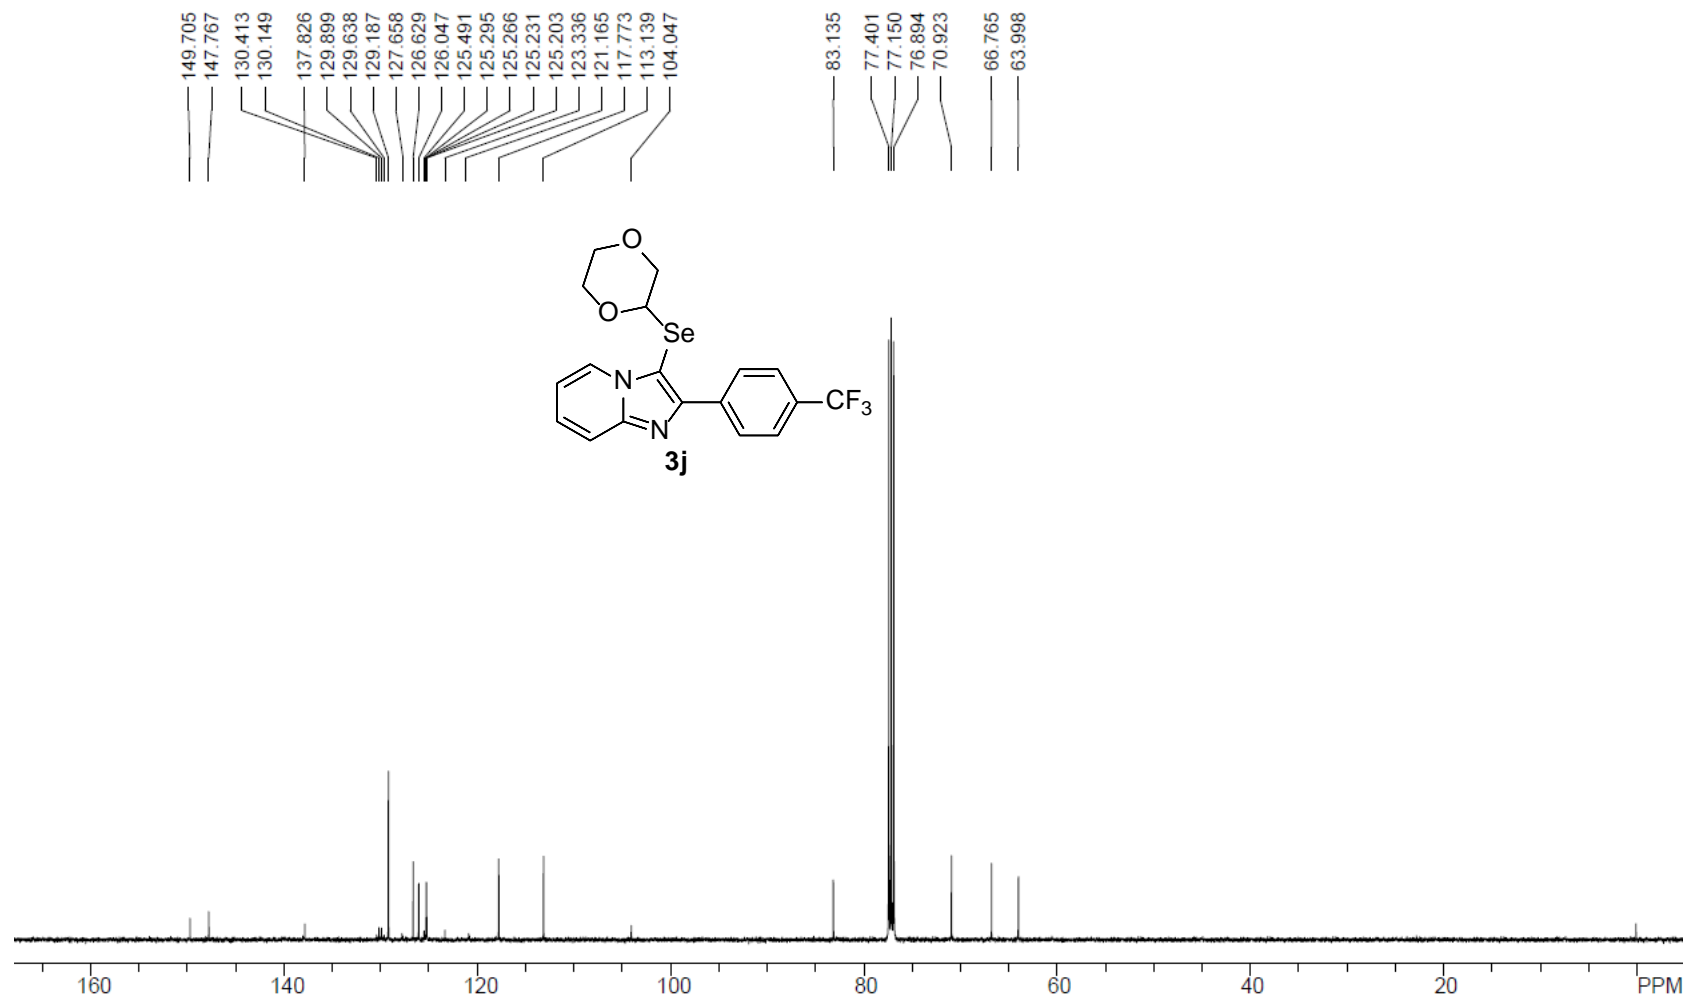

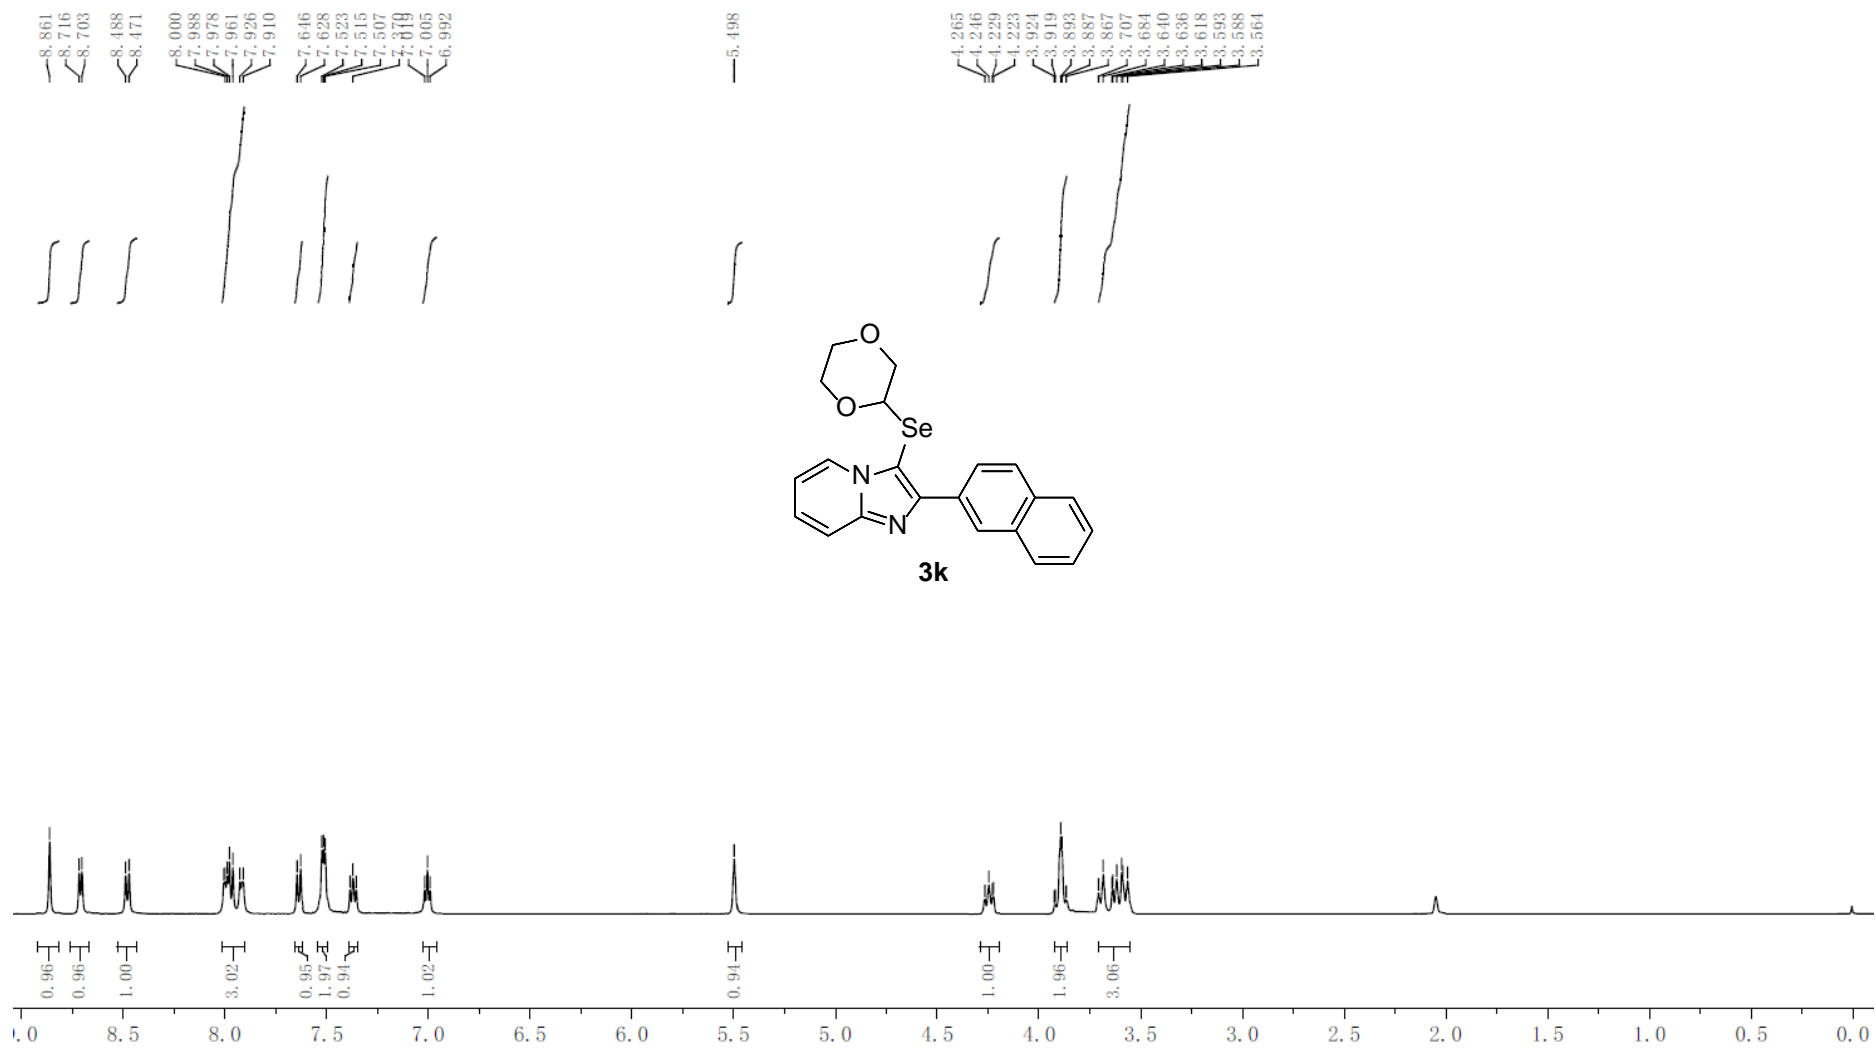

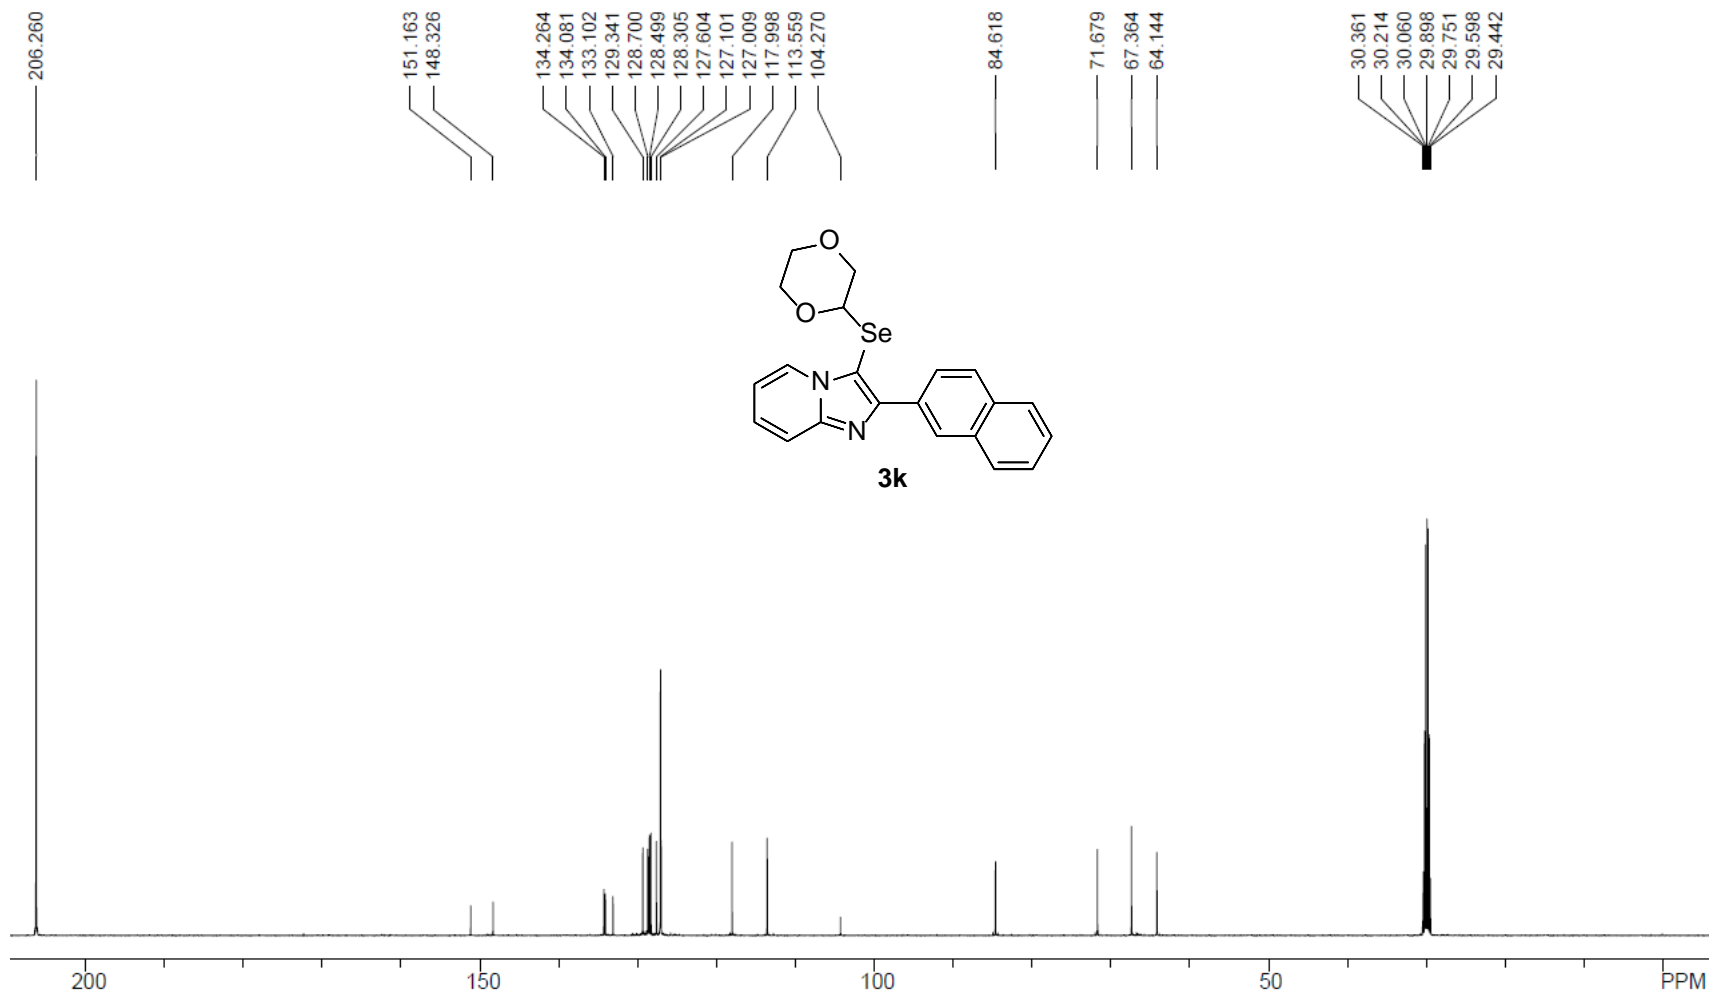



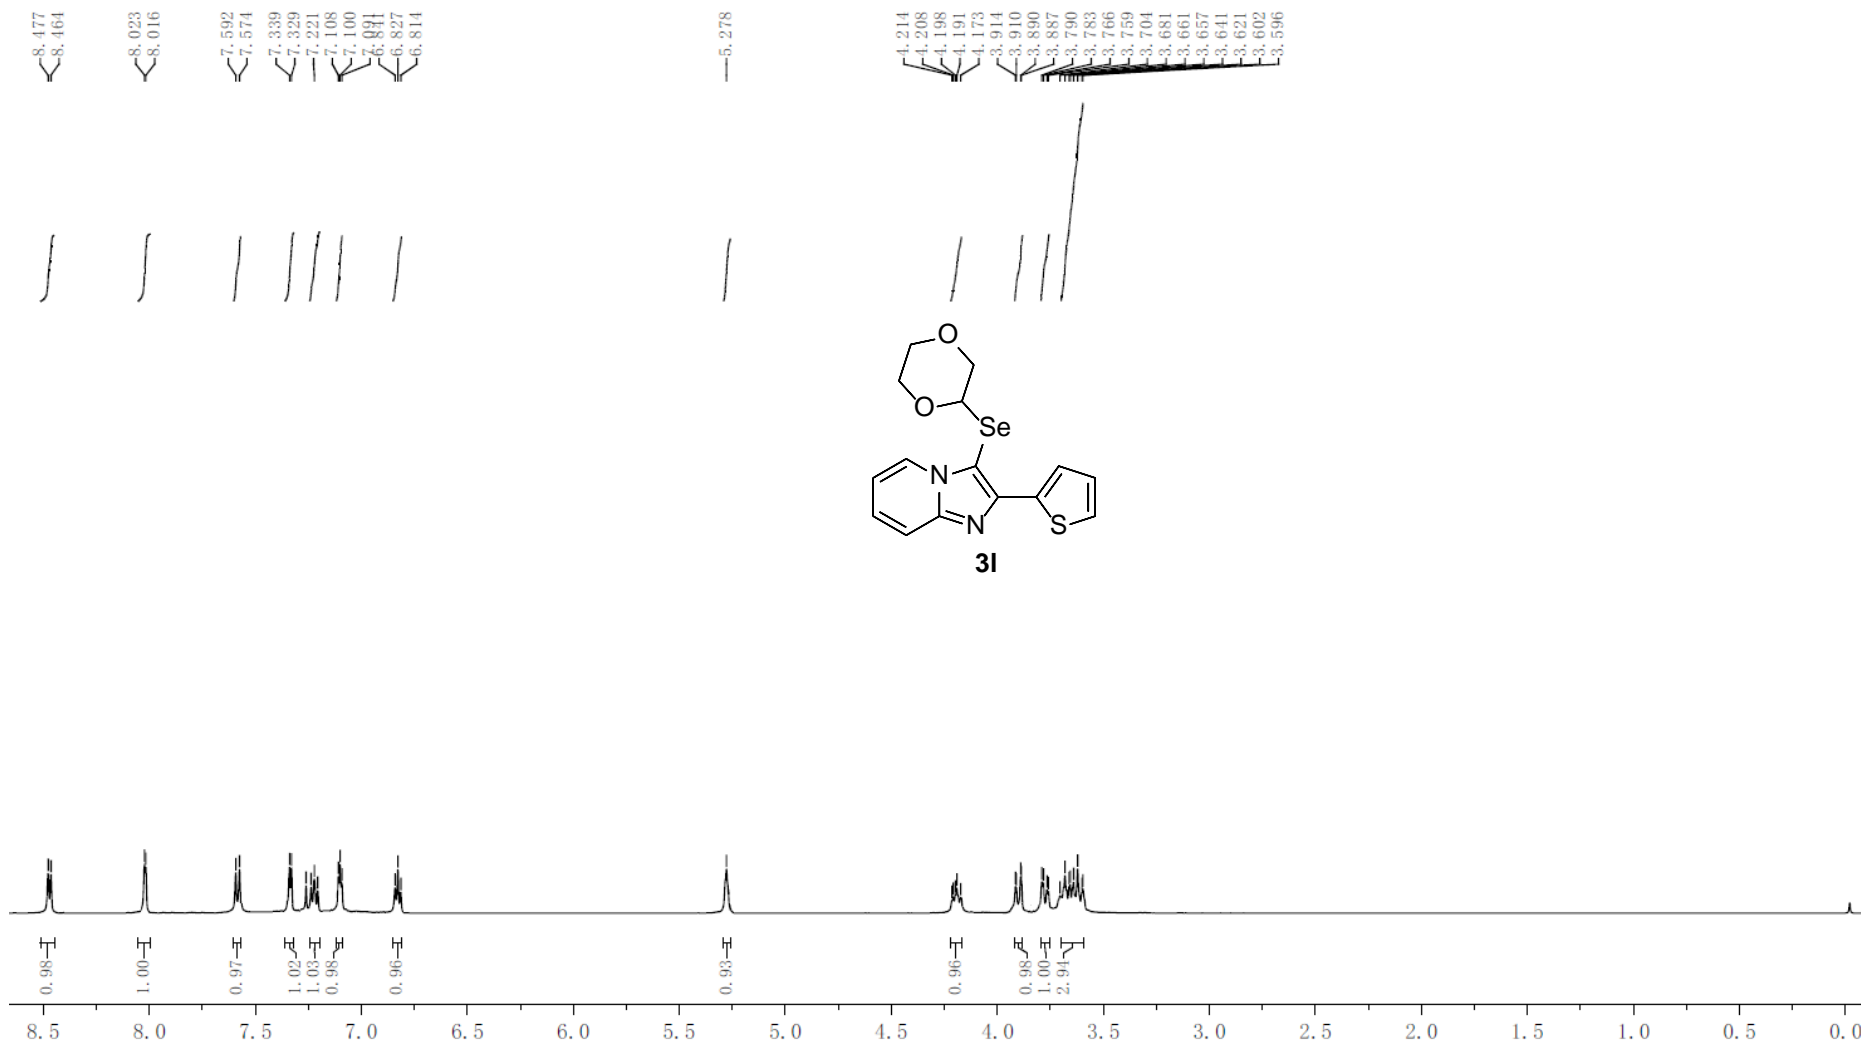

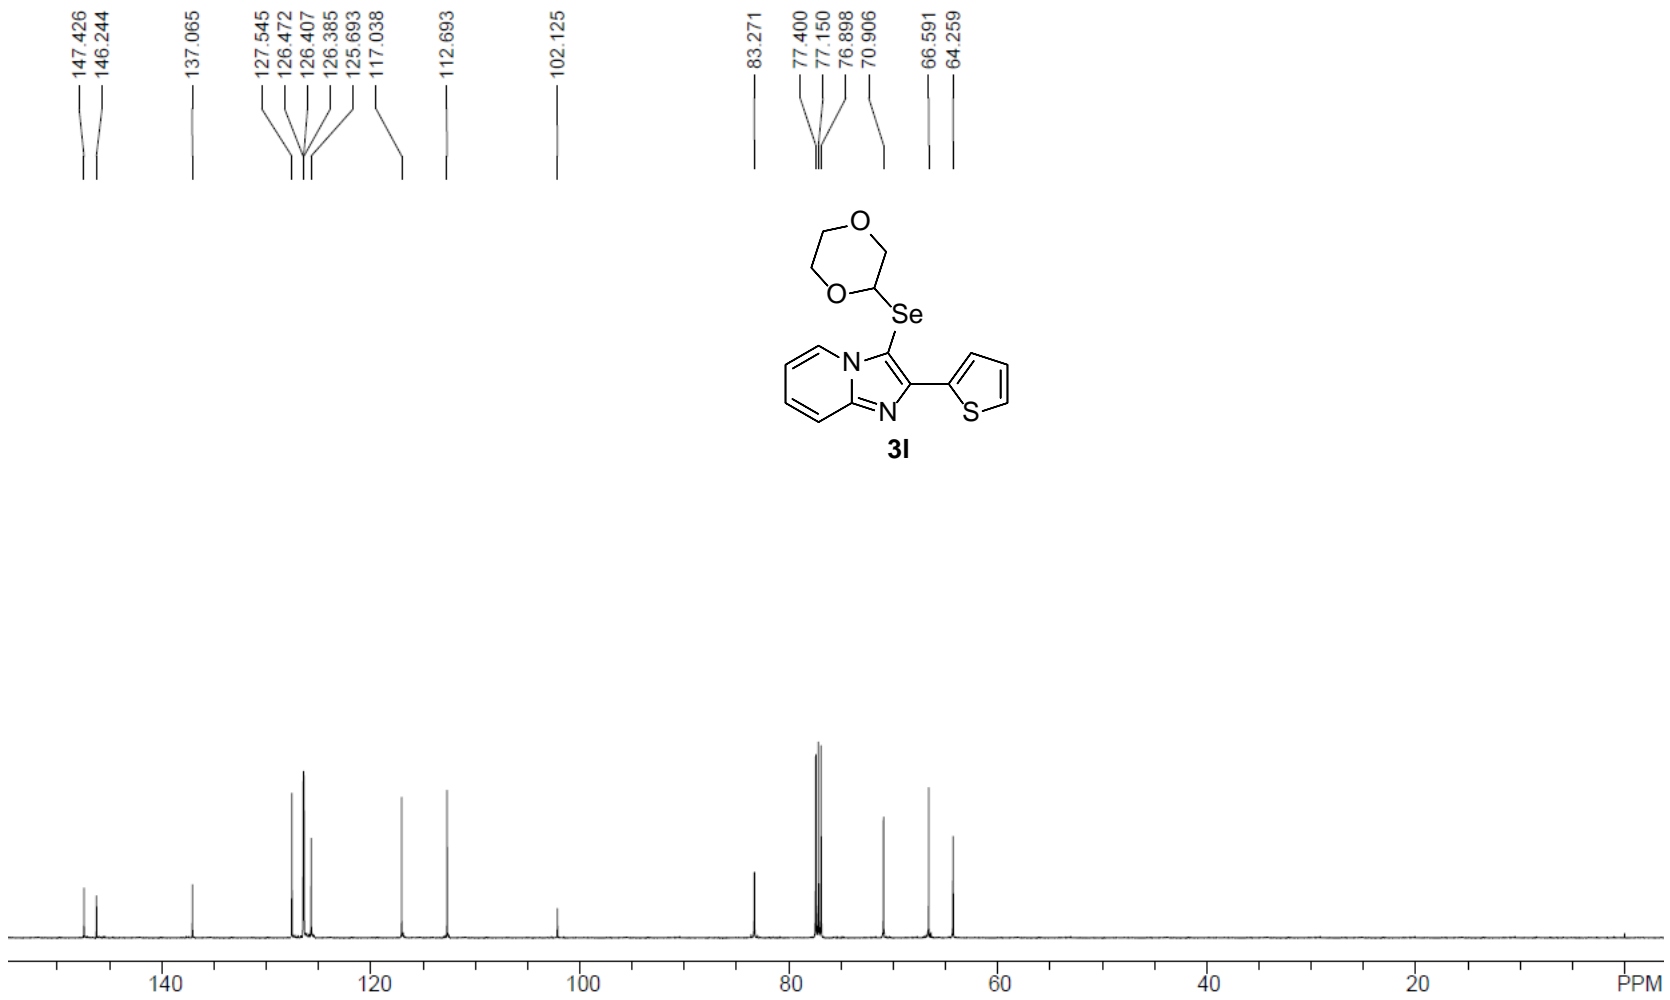

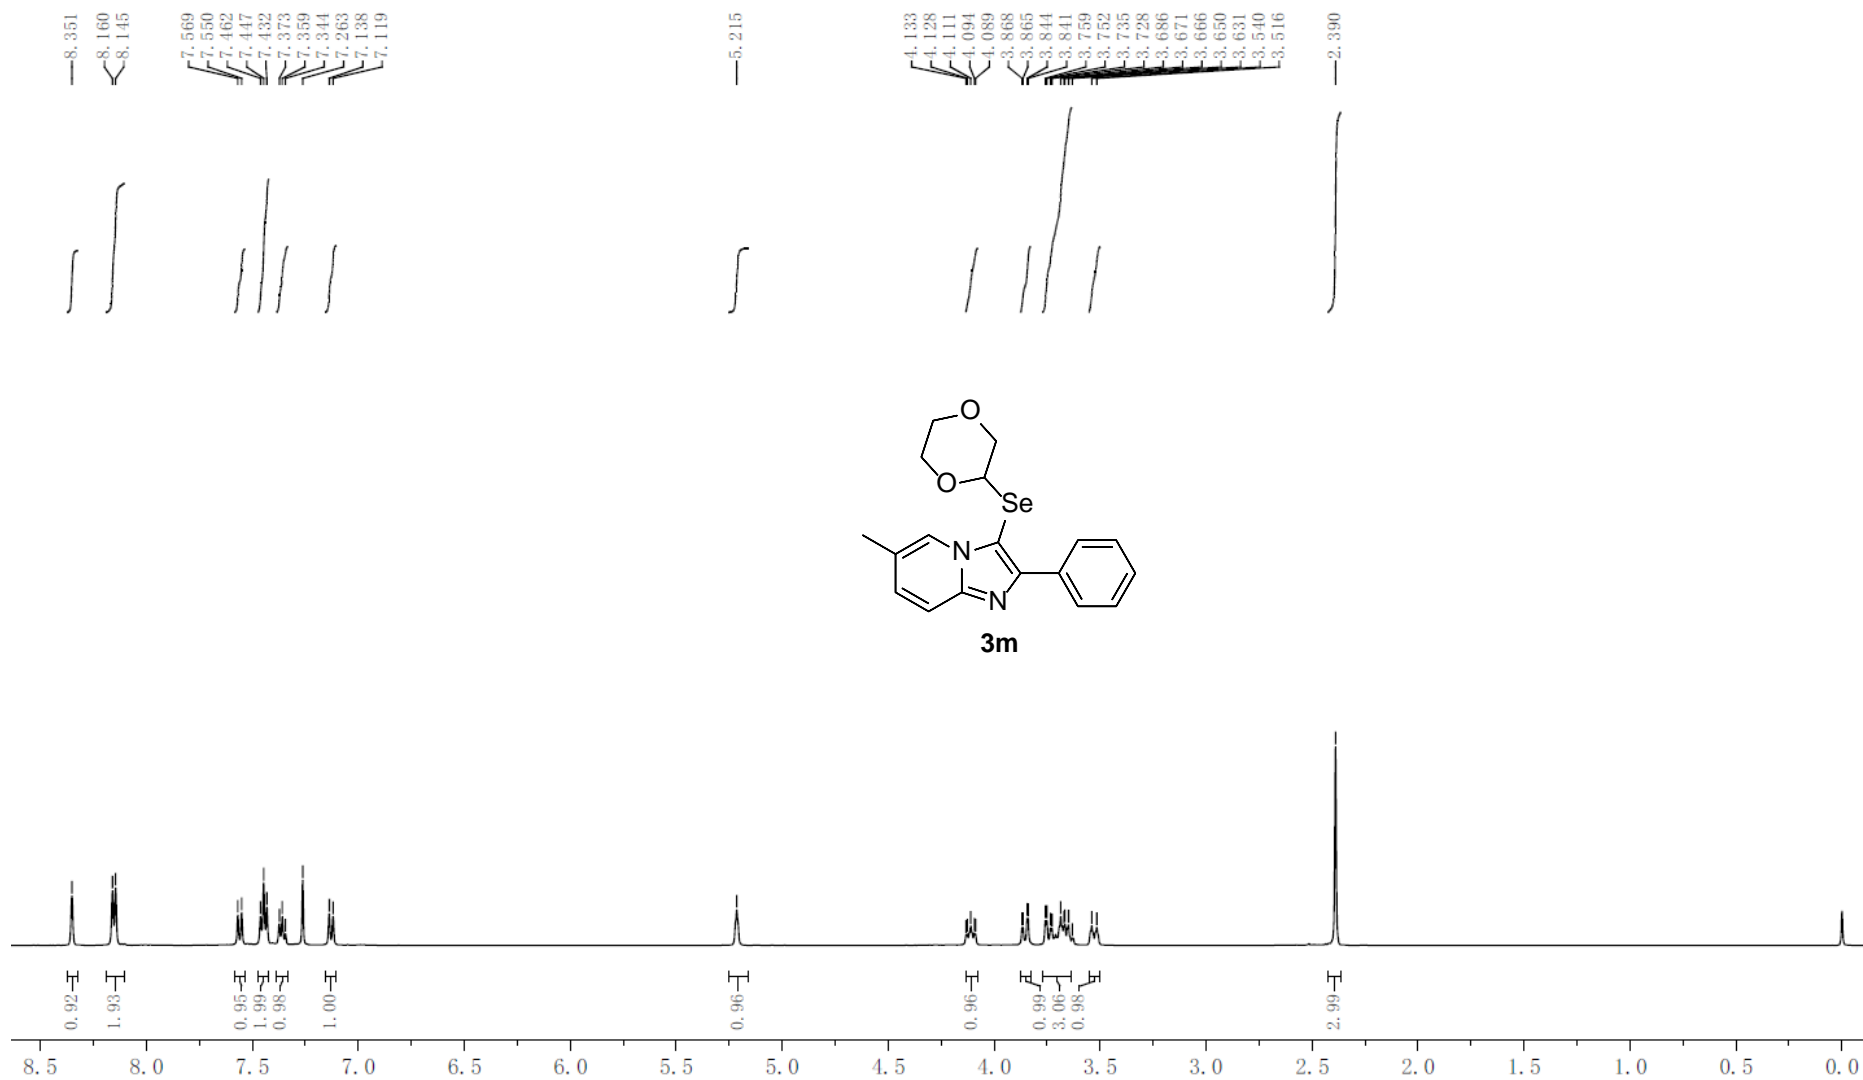

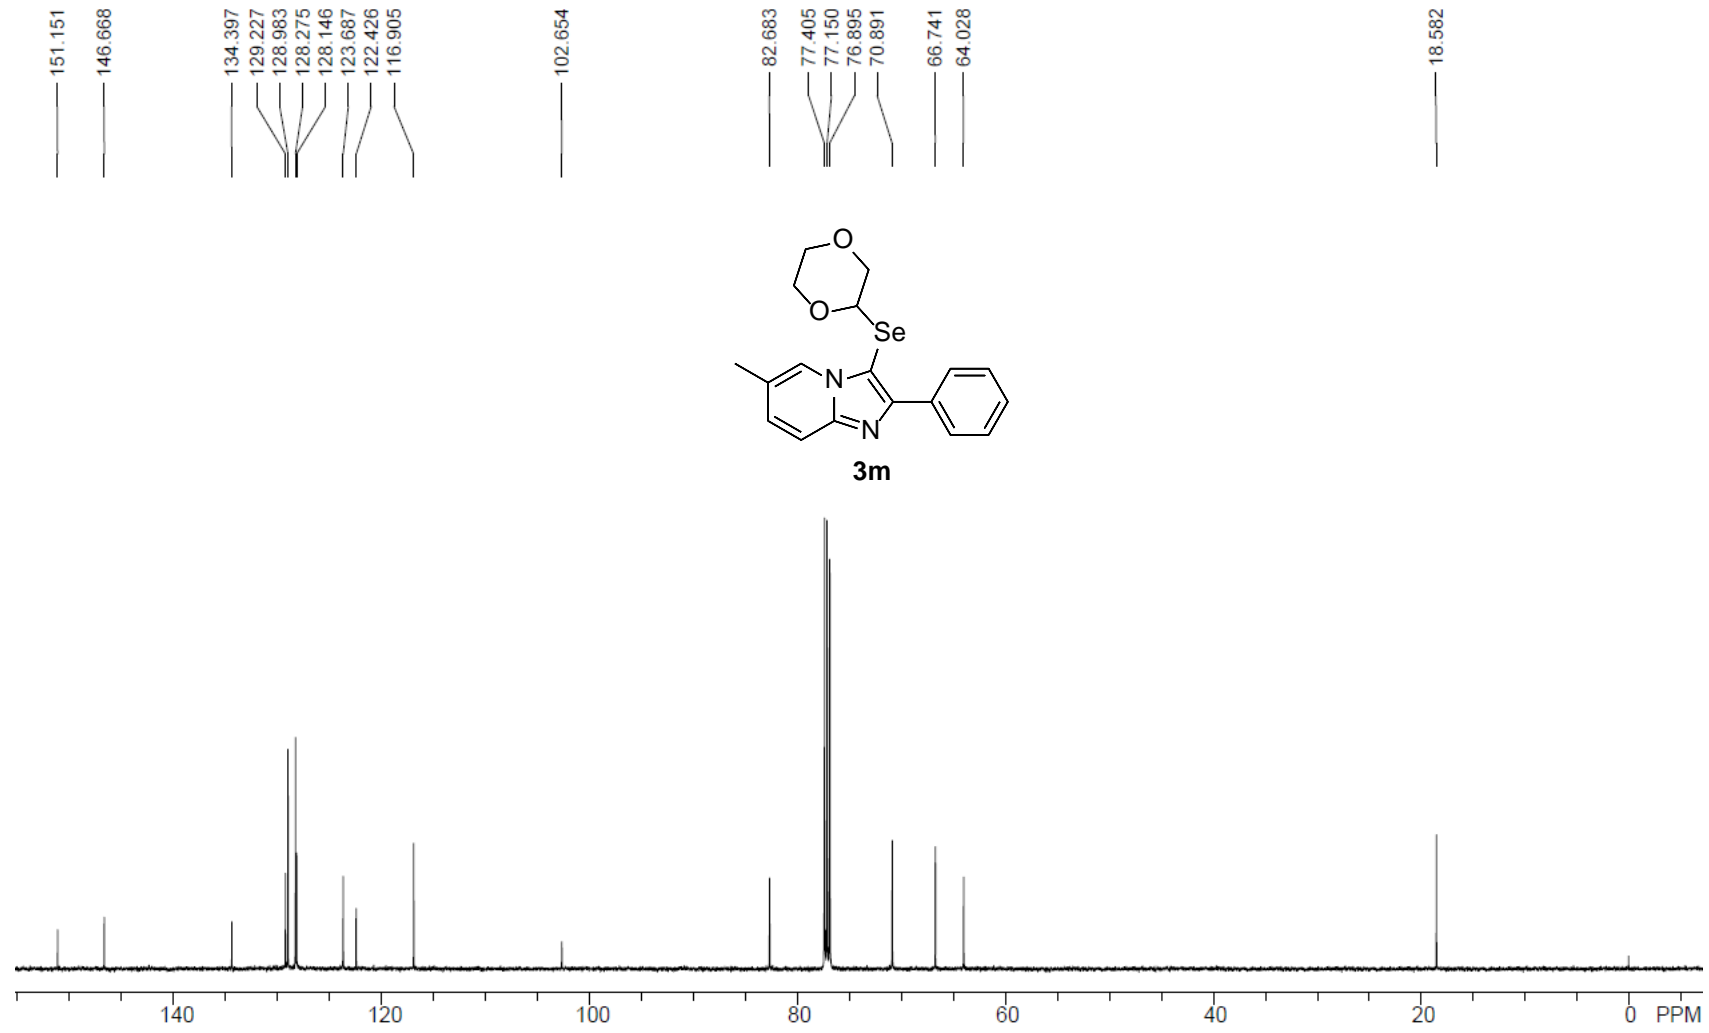

8.618  
8.151  
8.135  
7.608  
7.589  
7.474  
7.459  
7.444  
7.397  
7.382  
7.368  
7.264  
7.250  
7.231

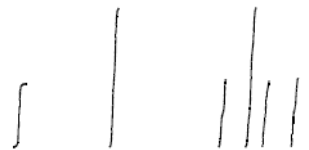

5.262  
4.152  
4.148  
4.130  
4.113  
4.108  
3.881  
3.877  
3.857  
3.853  
3.769  
3.762  
3.745  
3.738  
3.721  
3.698  
3.678  
3.674  
3.657  
3.638  
3.634  
3.552  
3.528

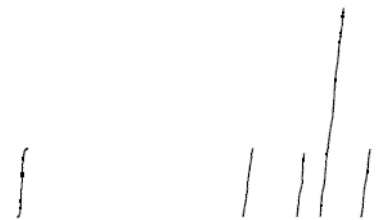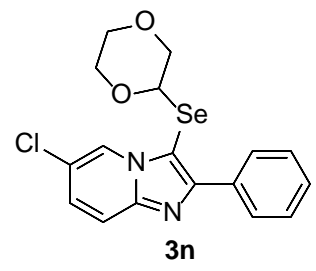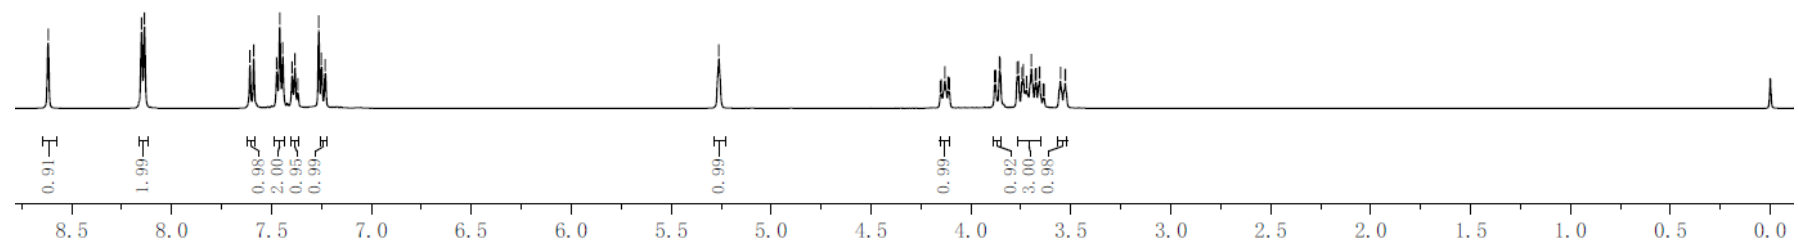

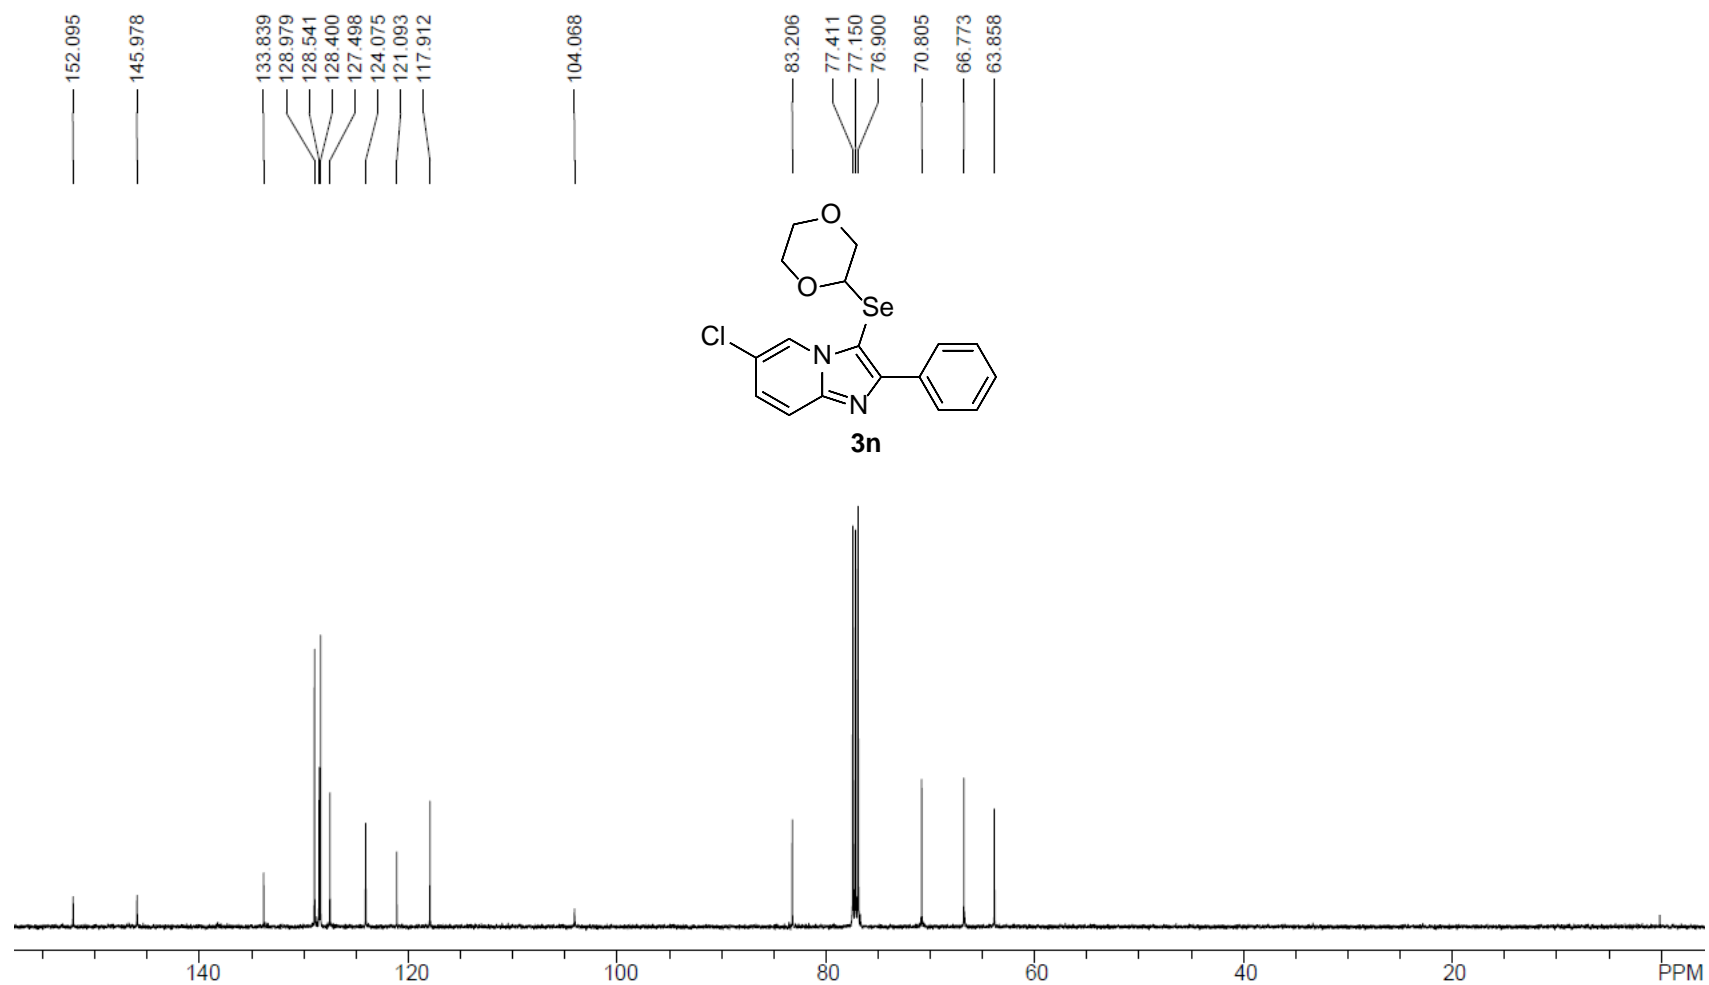

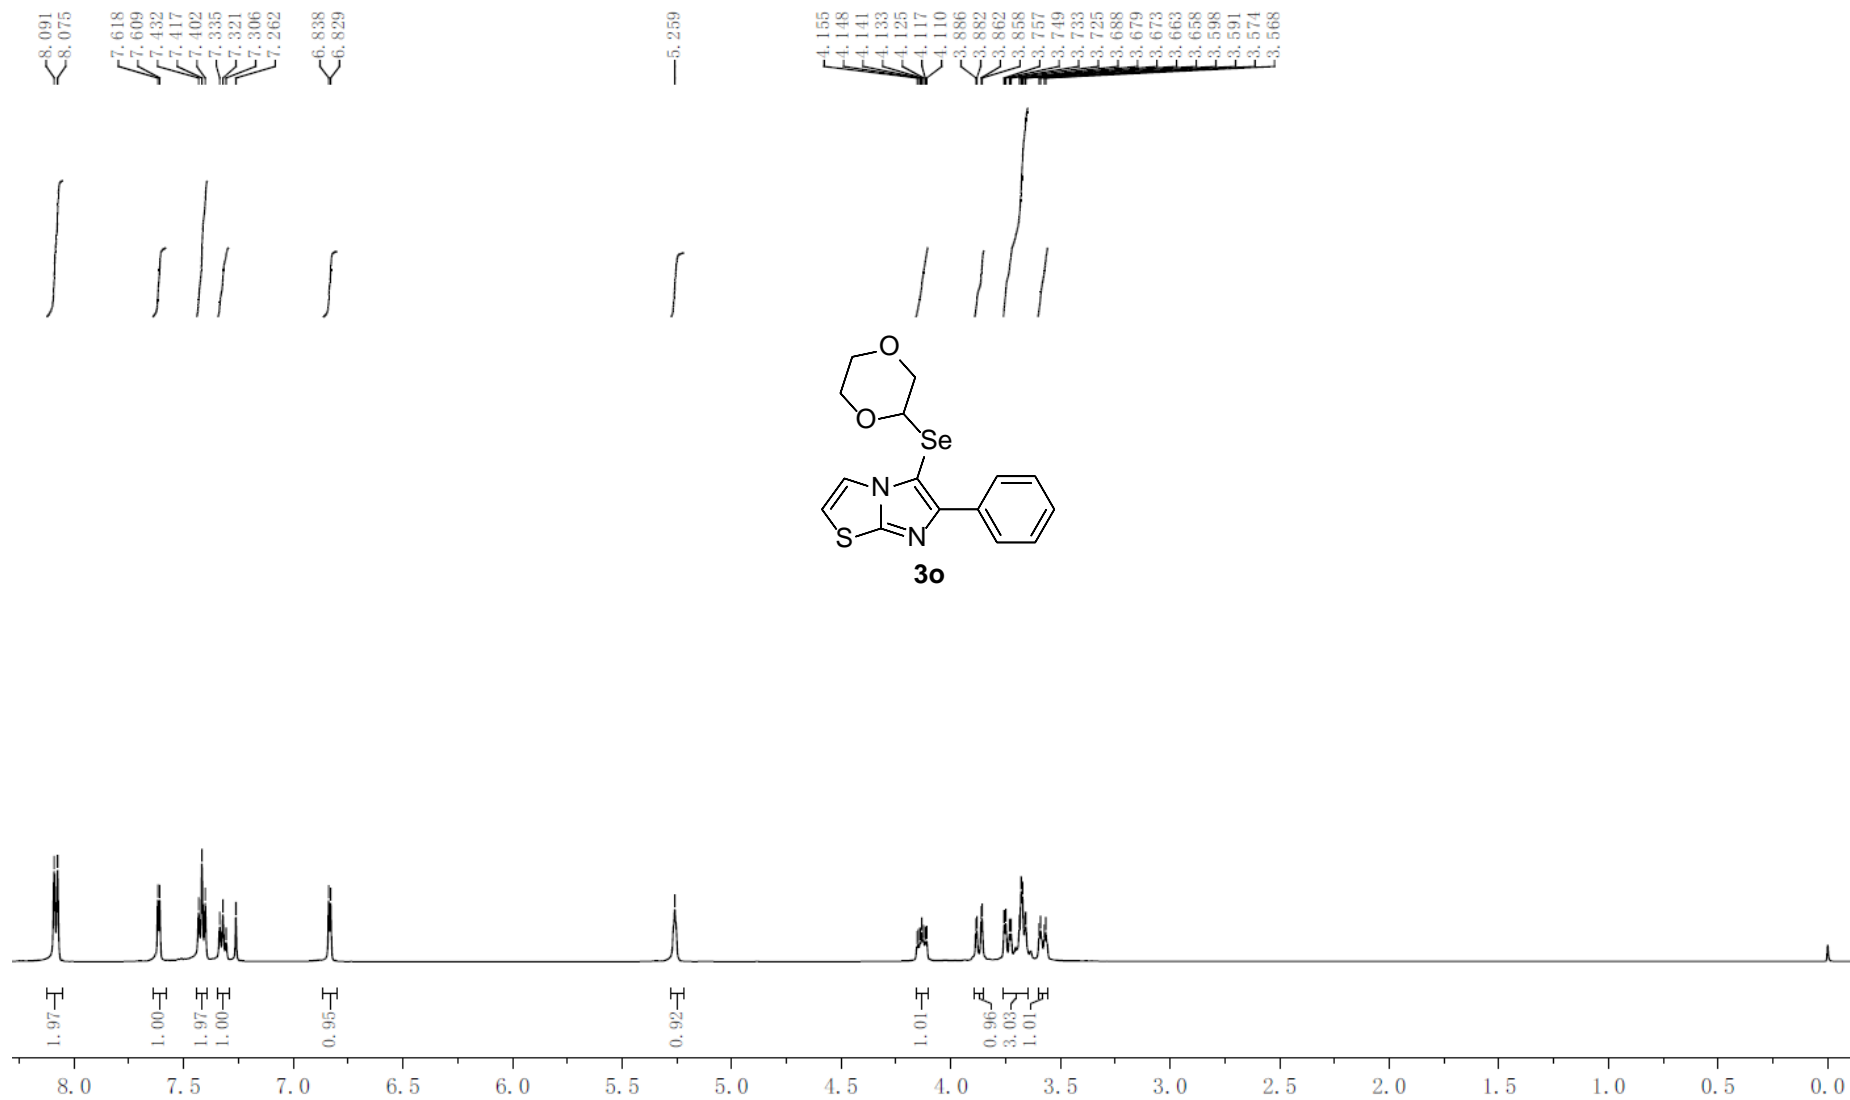

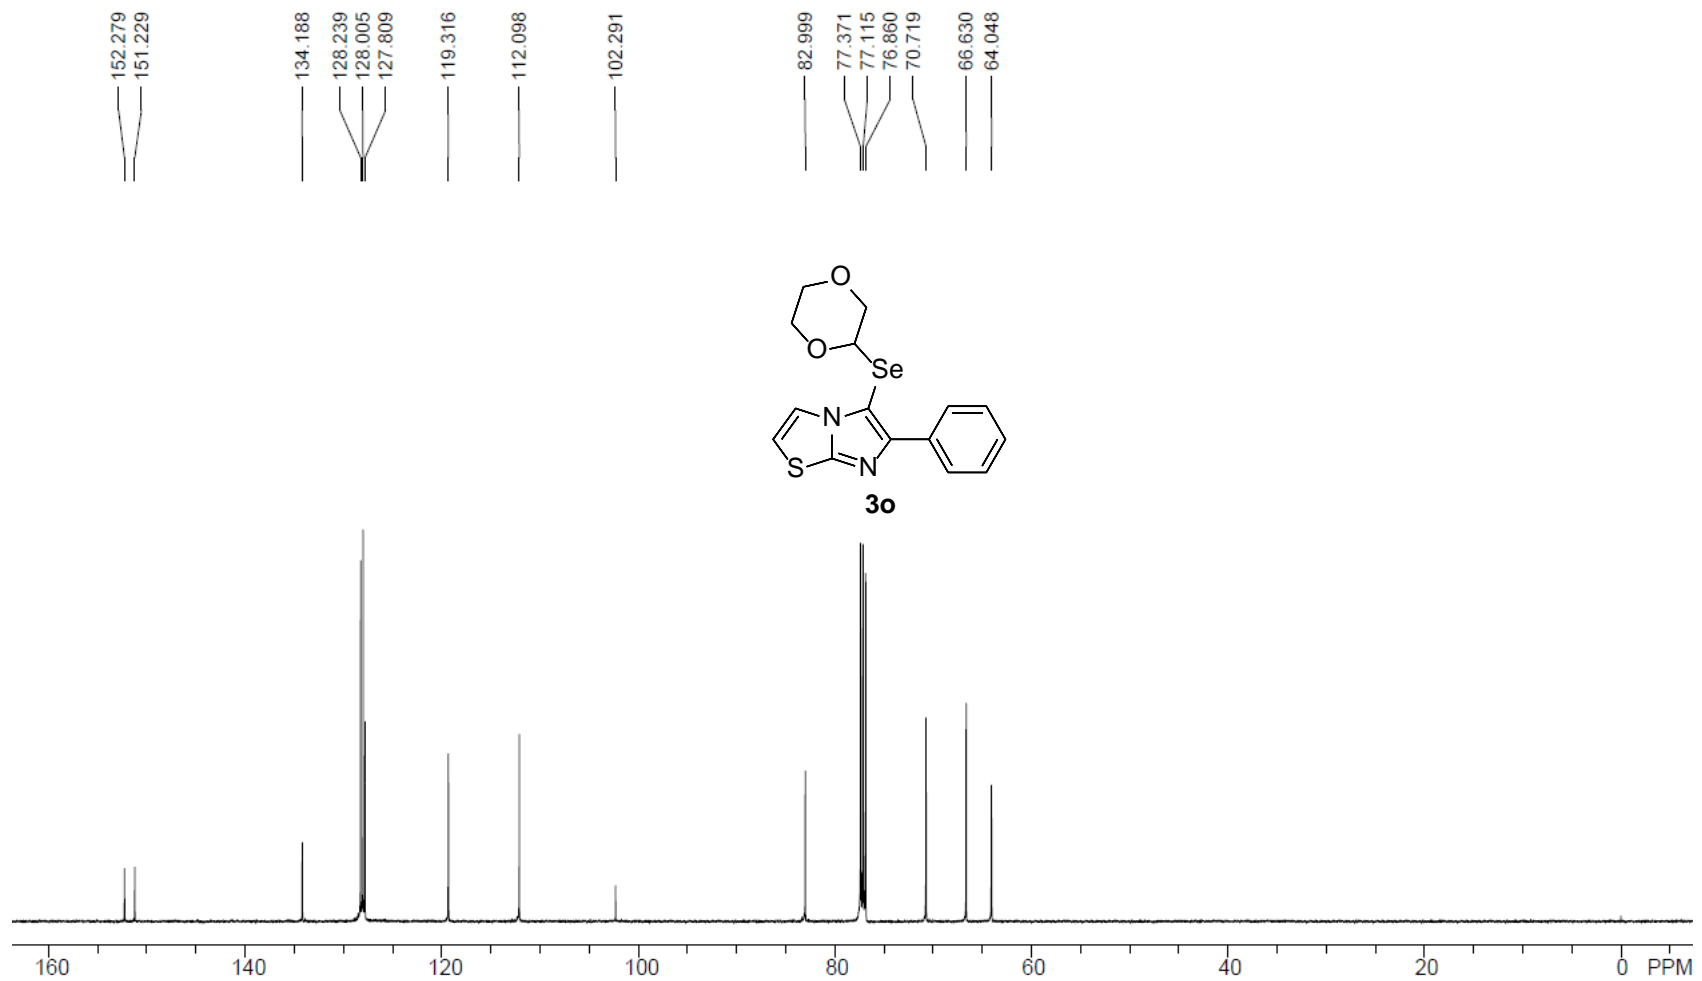



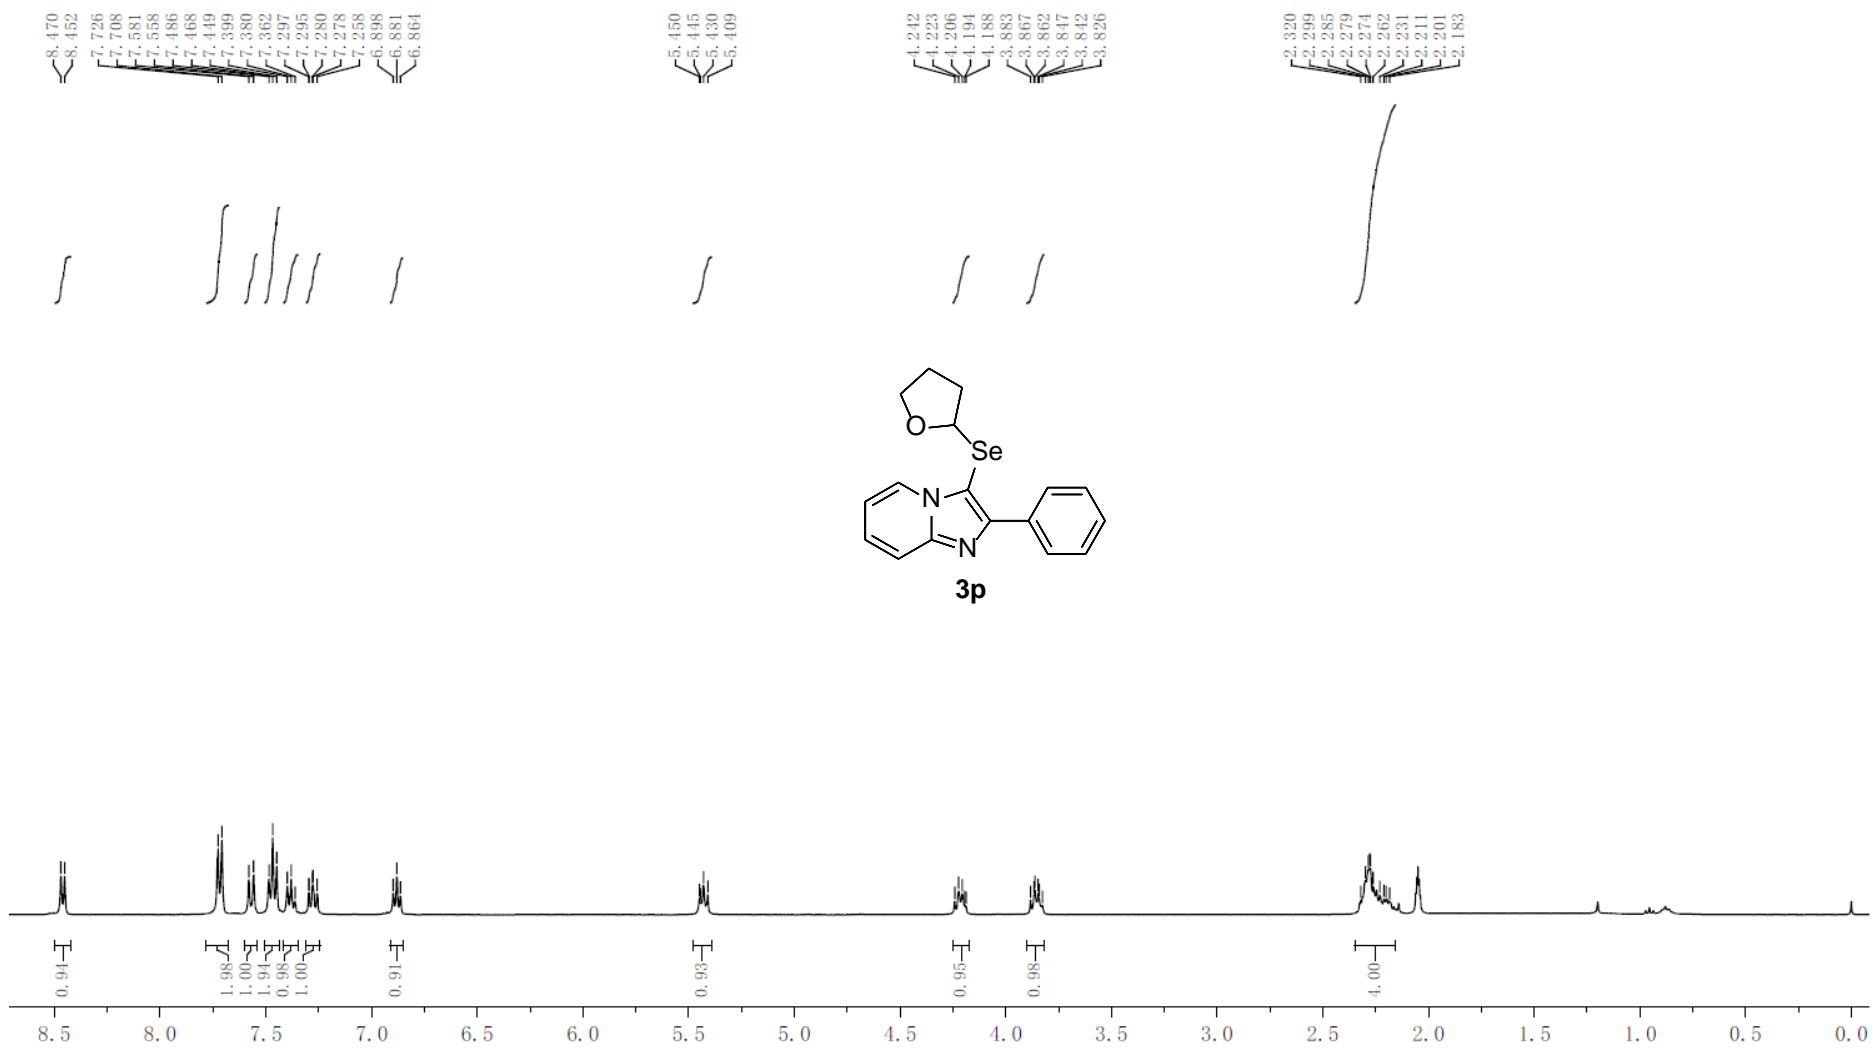

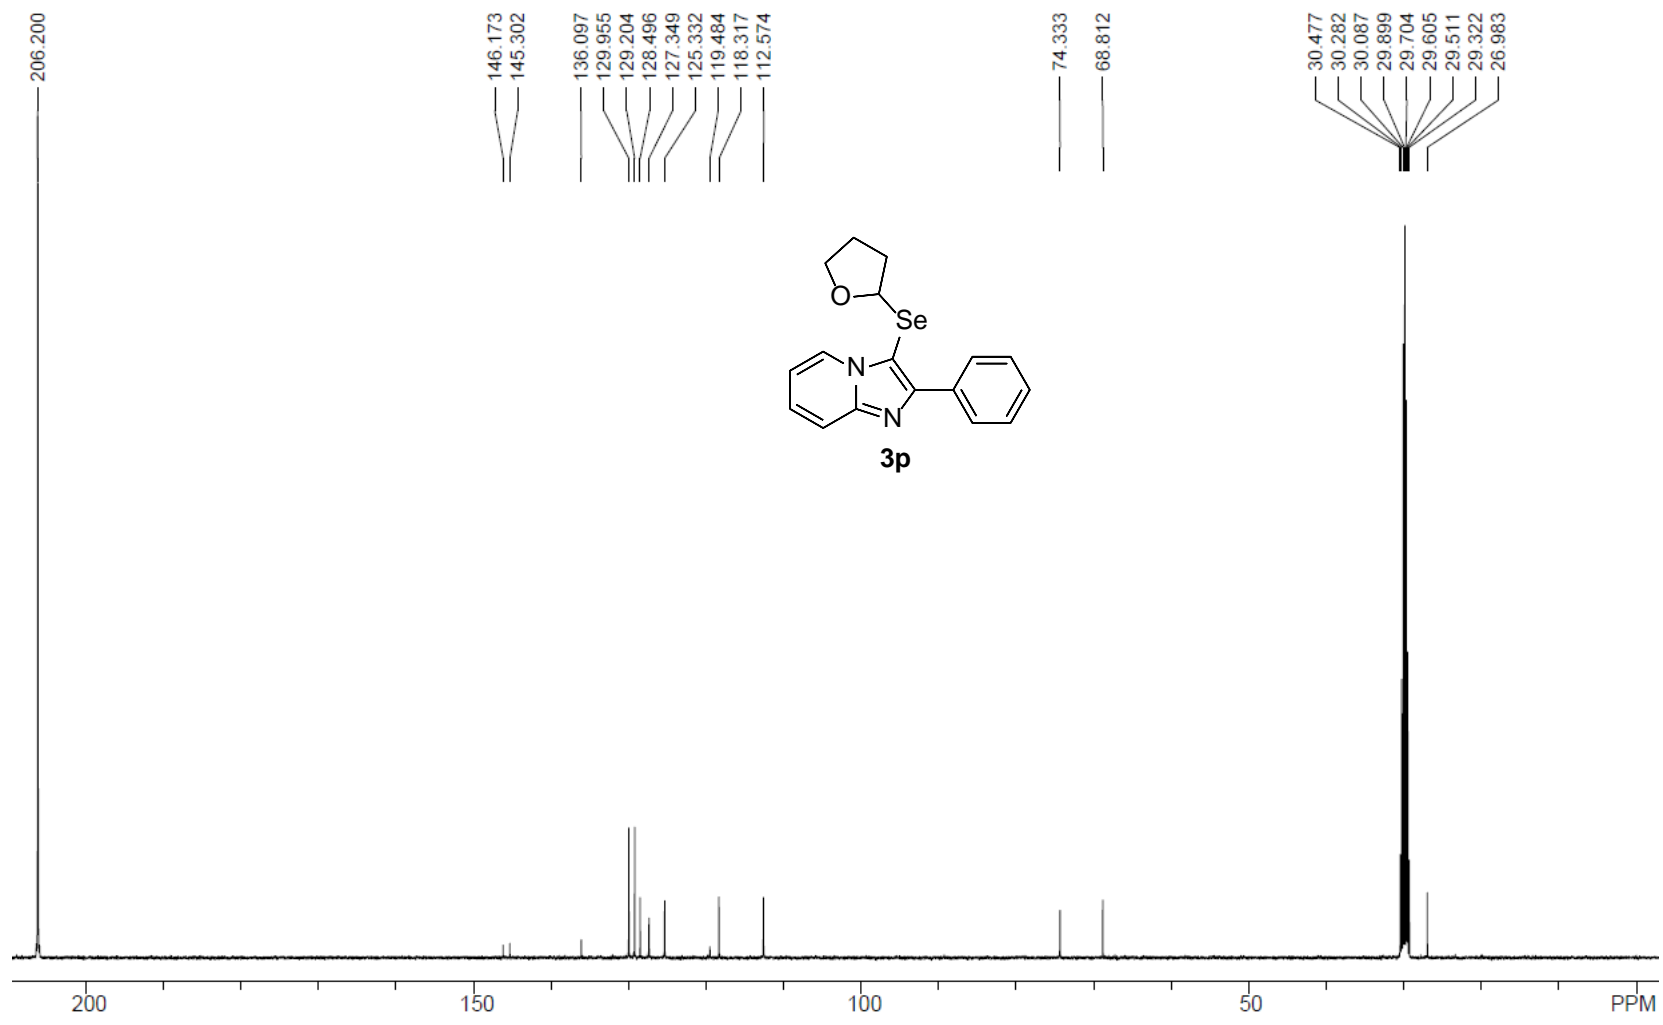

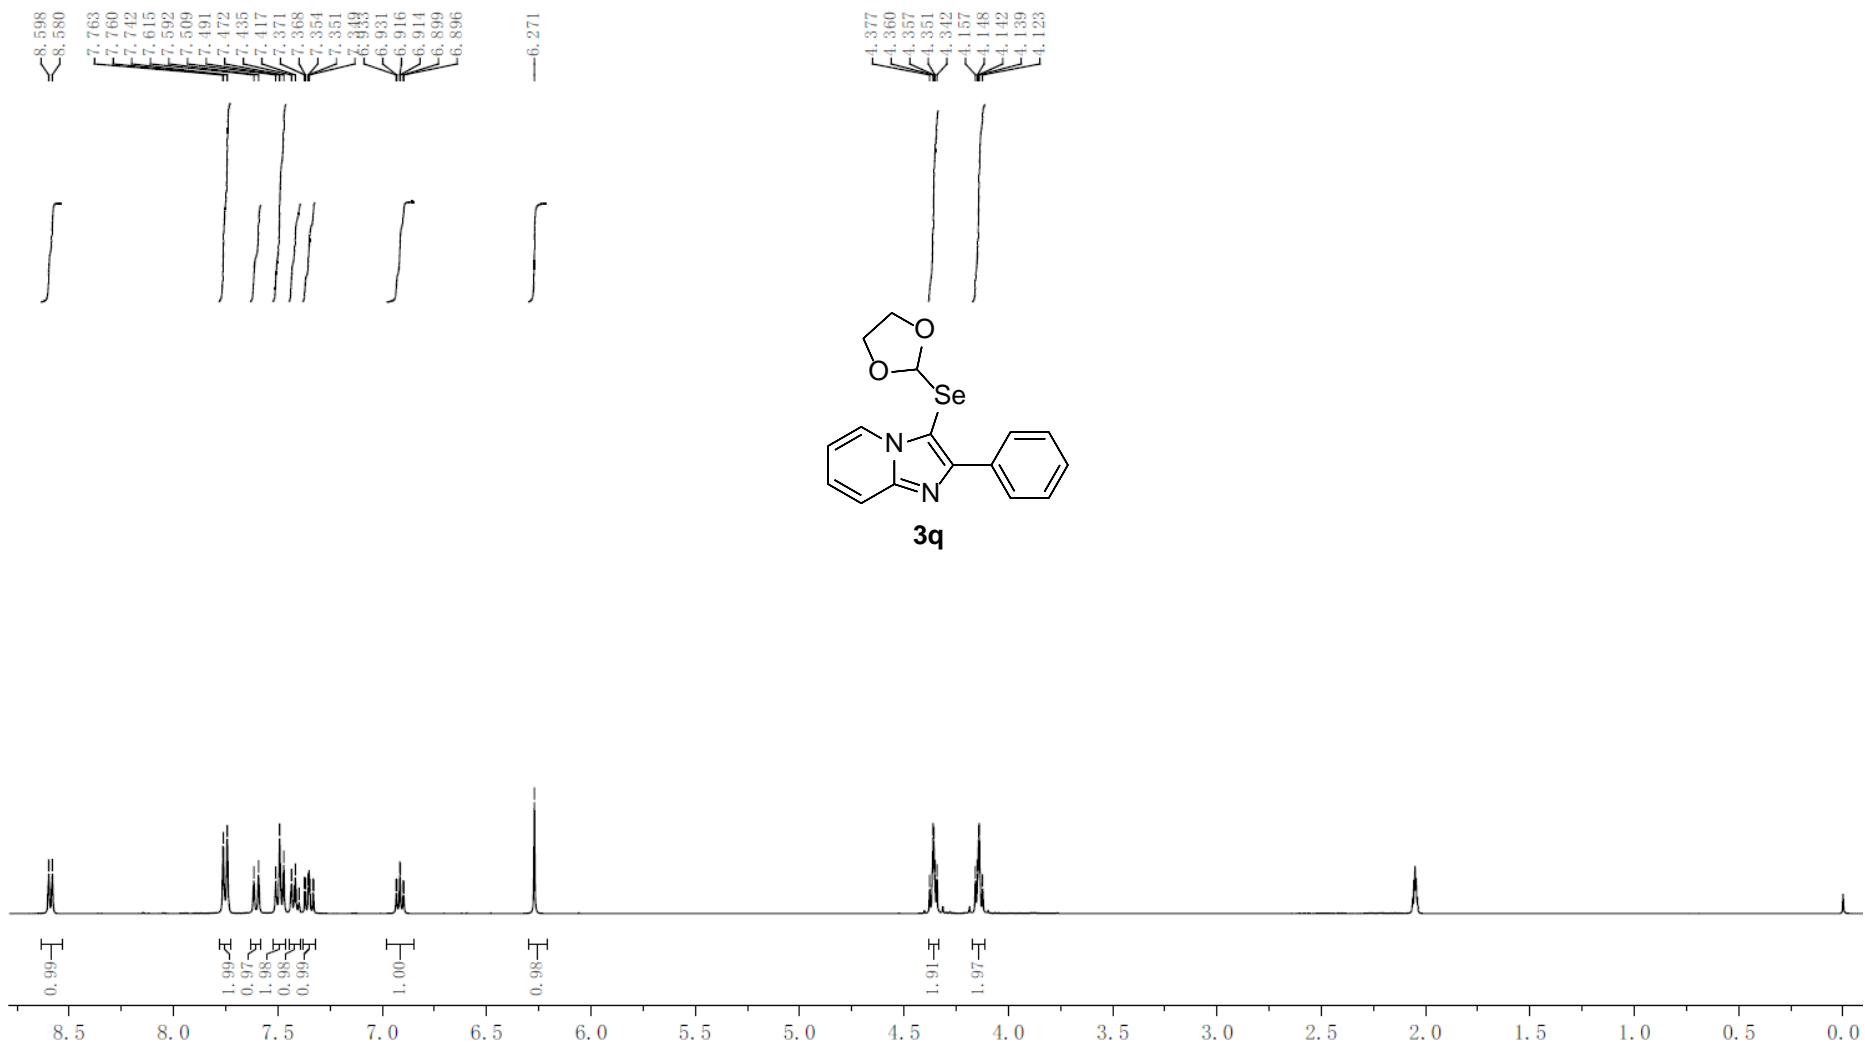

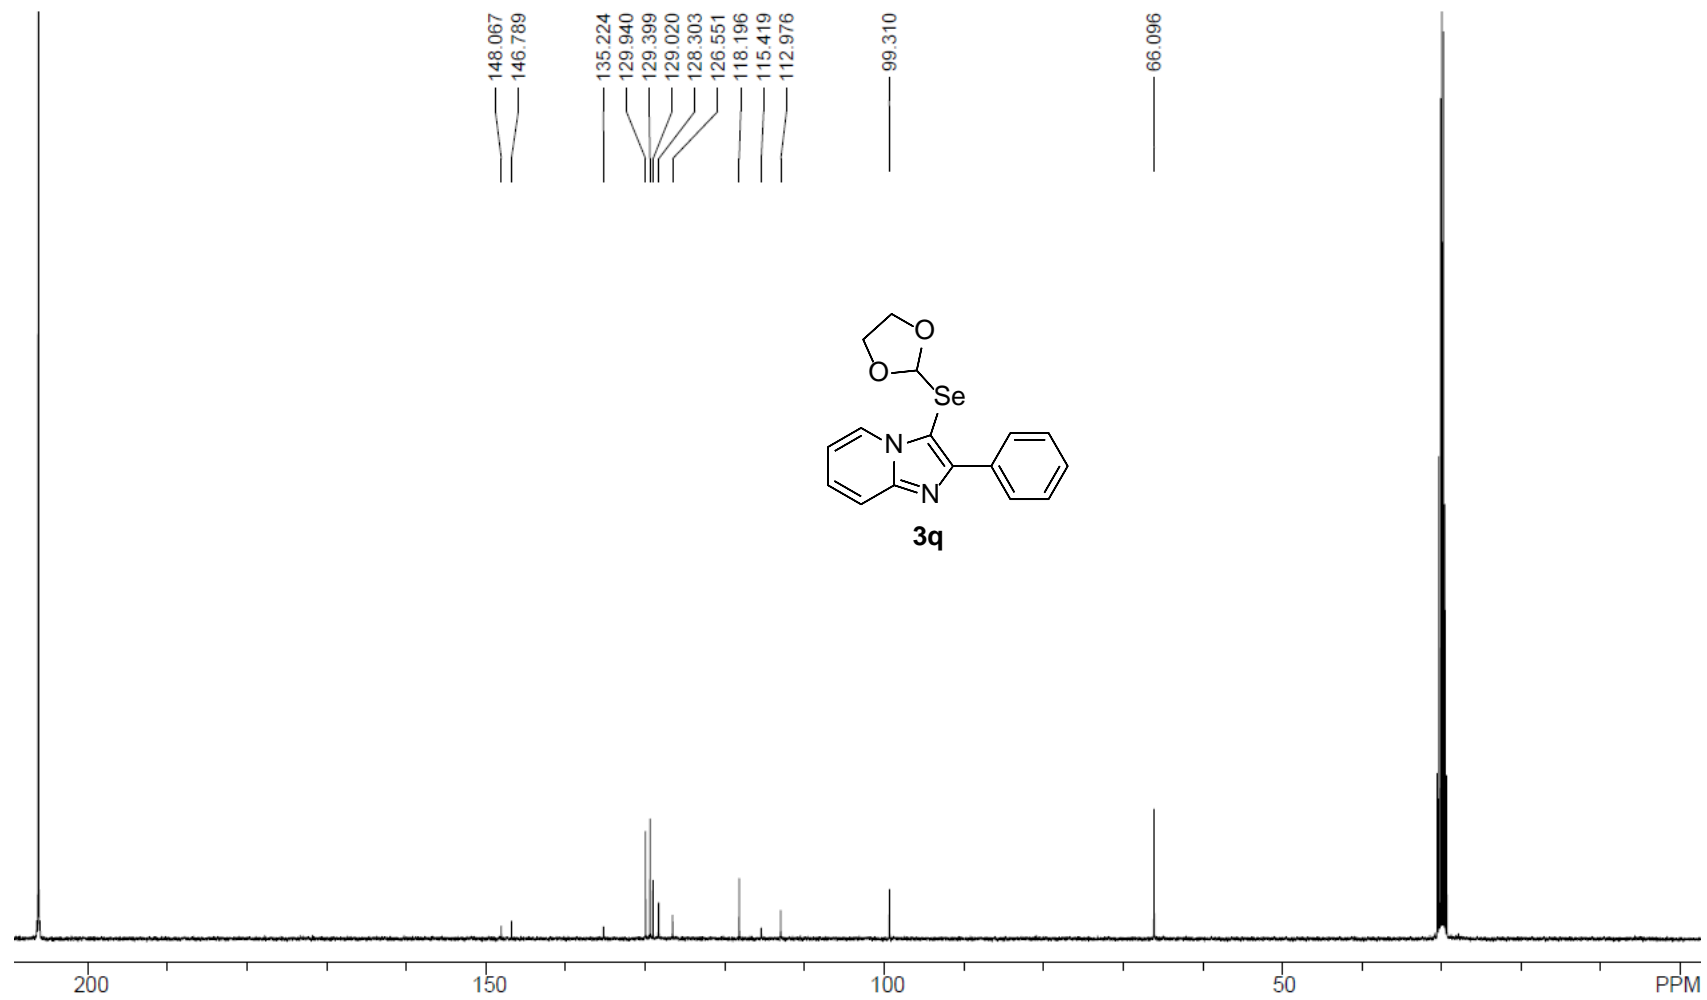

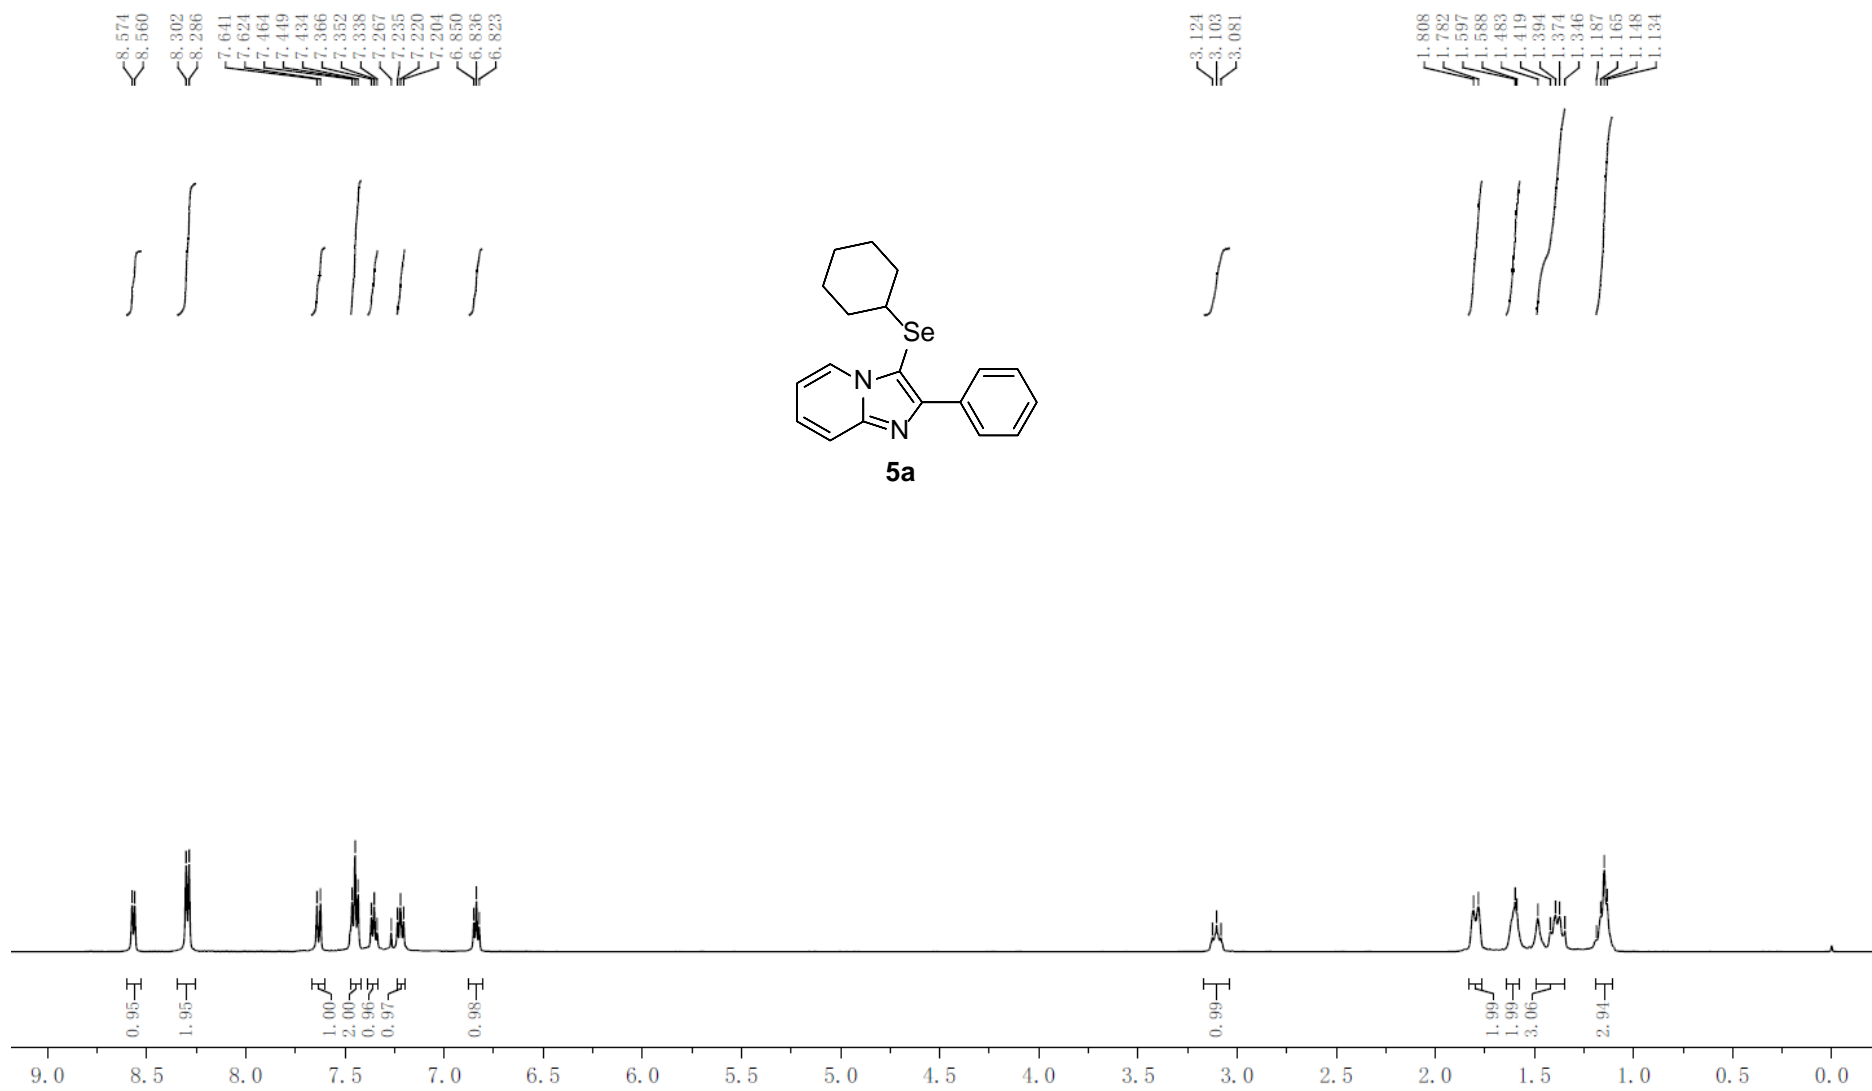

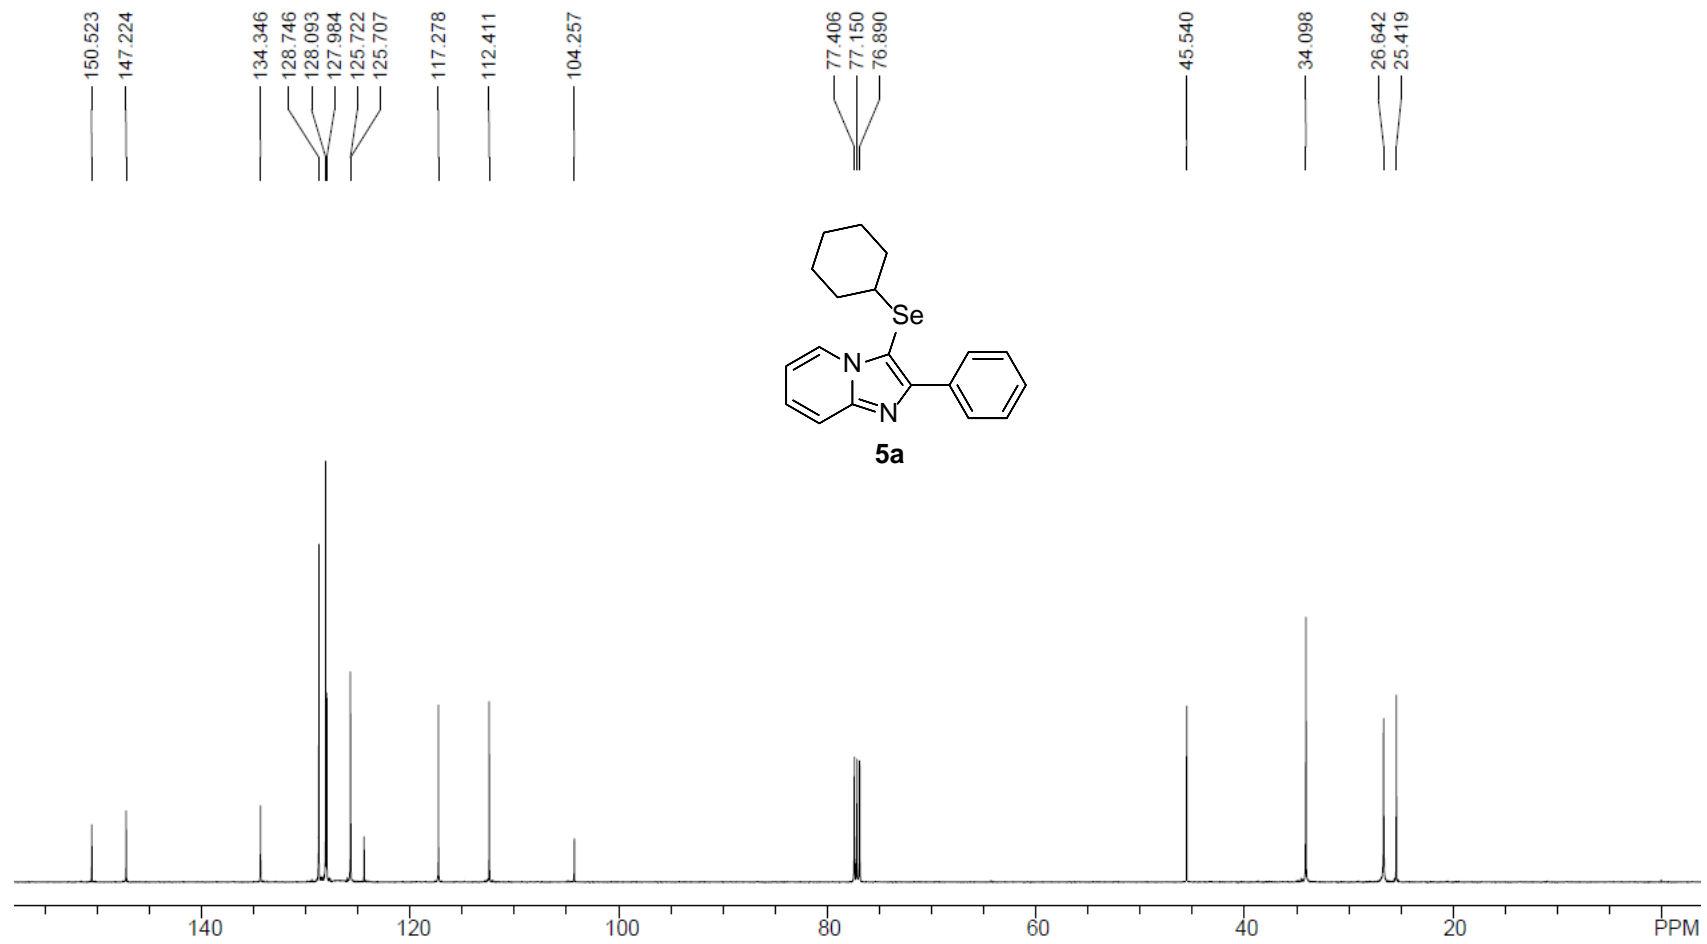

calmix 181130113445 #6 RT: 0.03 AV: 1 NL: 3.47E8  
T: FTMS + p ESIFull.ms [150.0000-2000.0000]

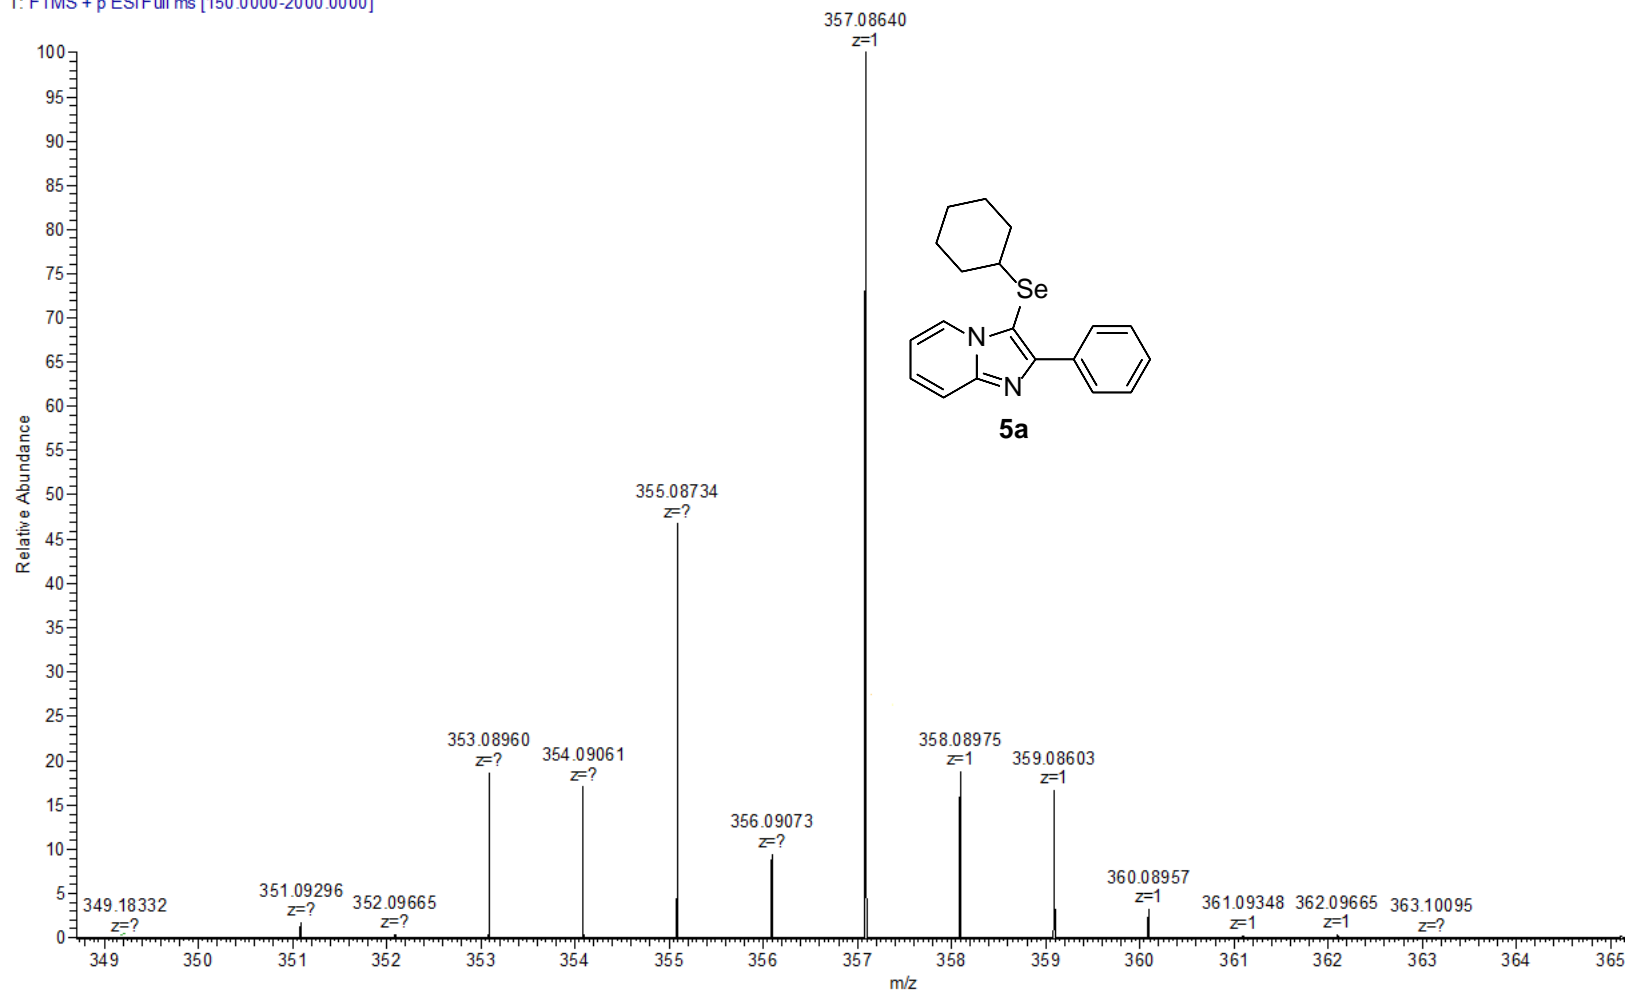

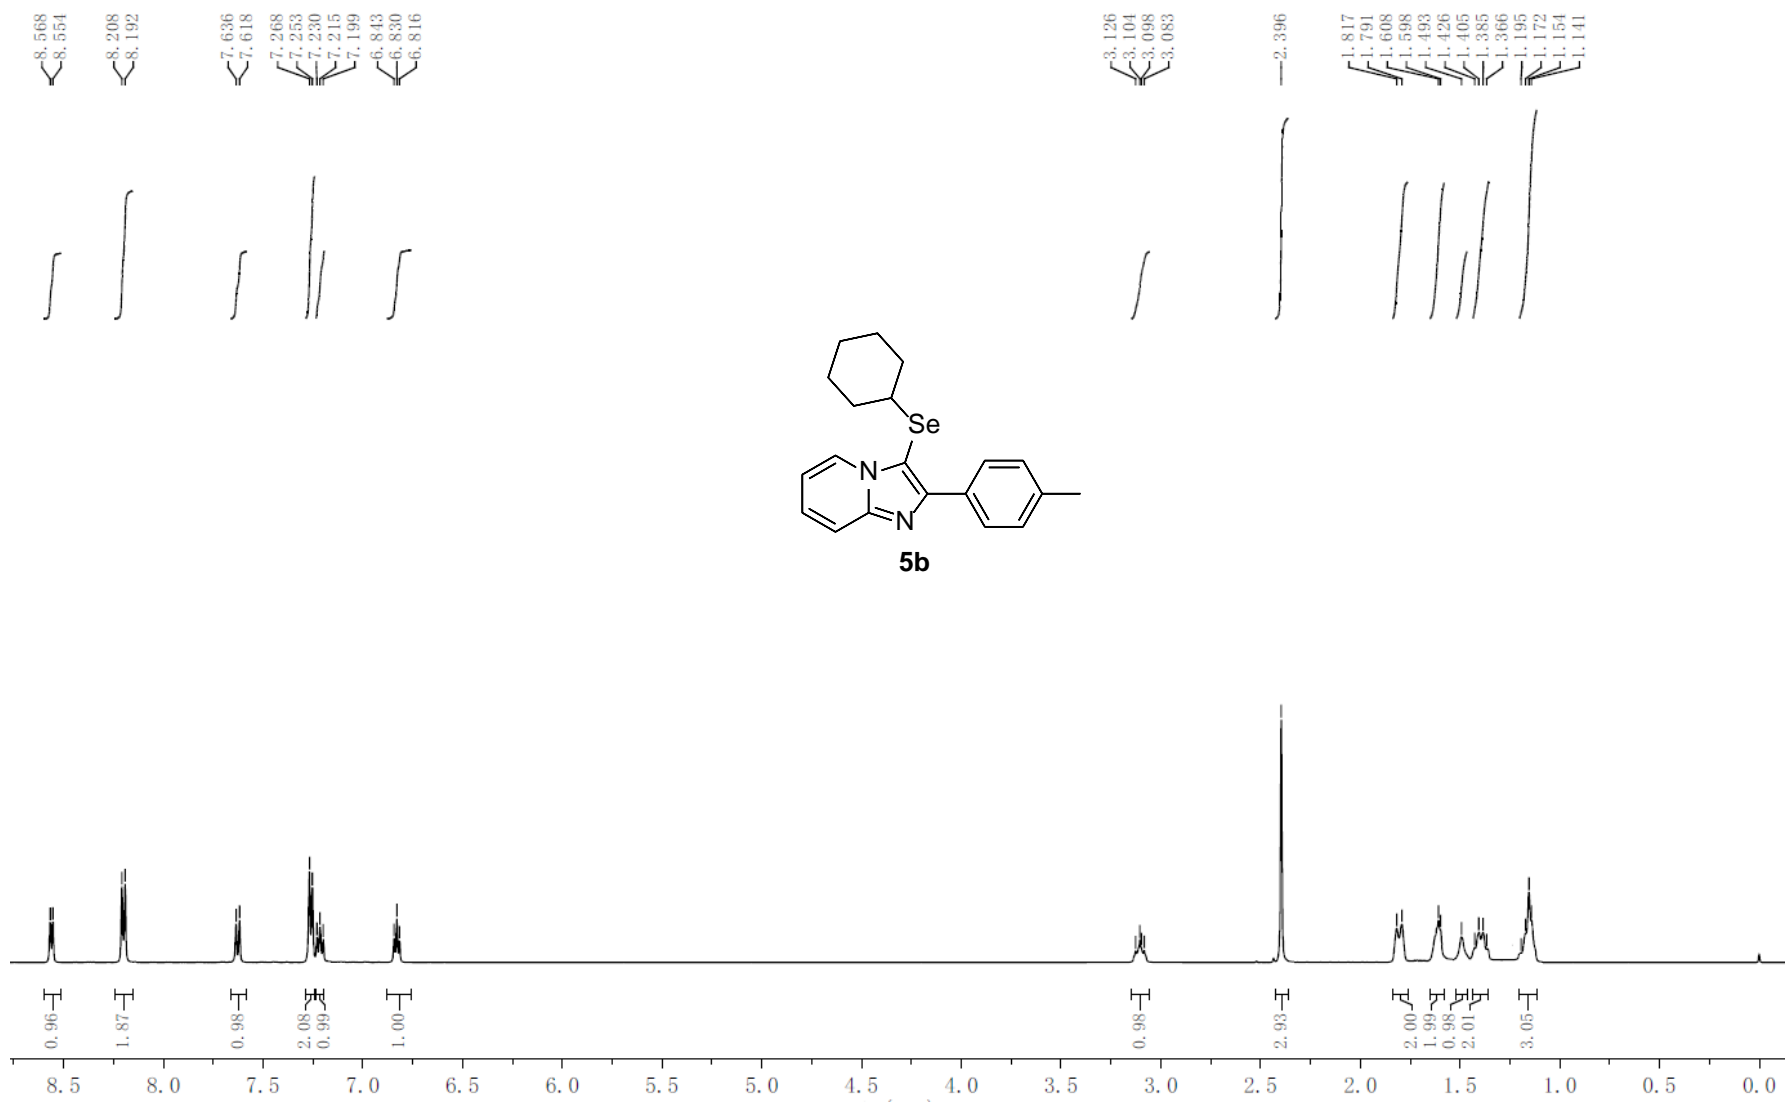



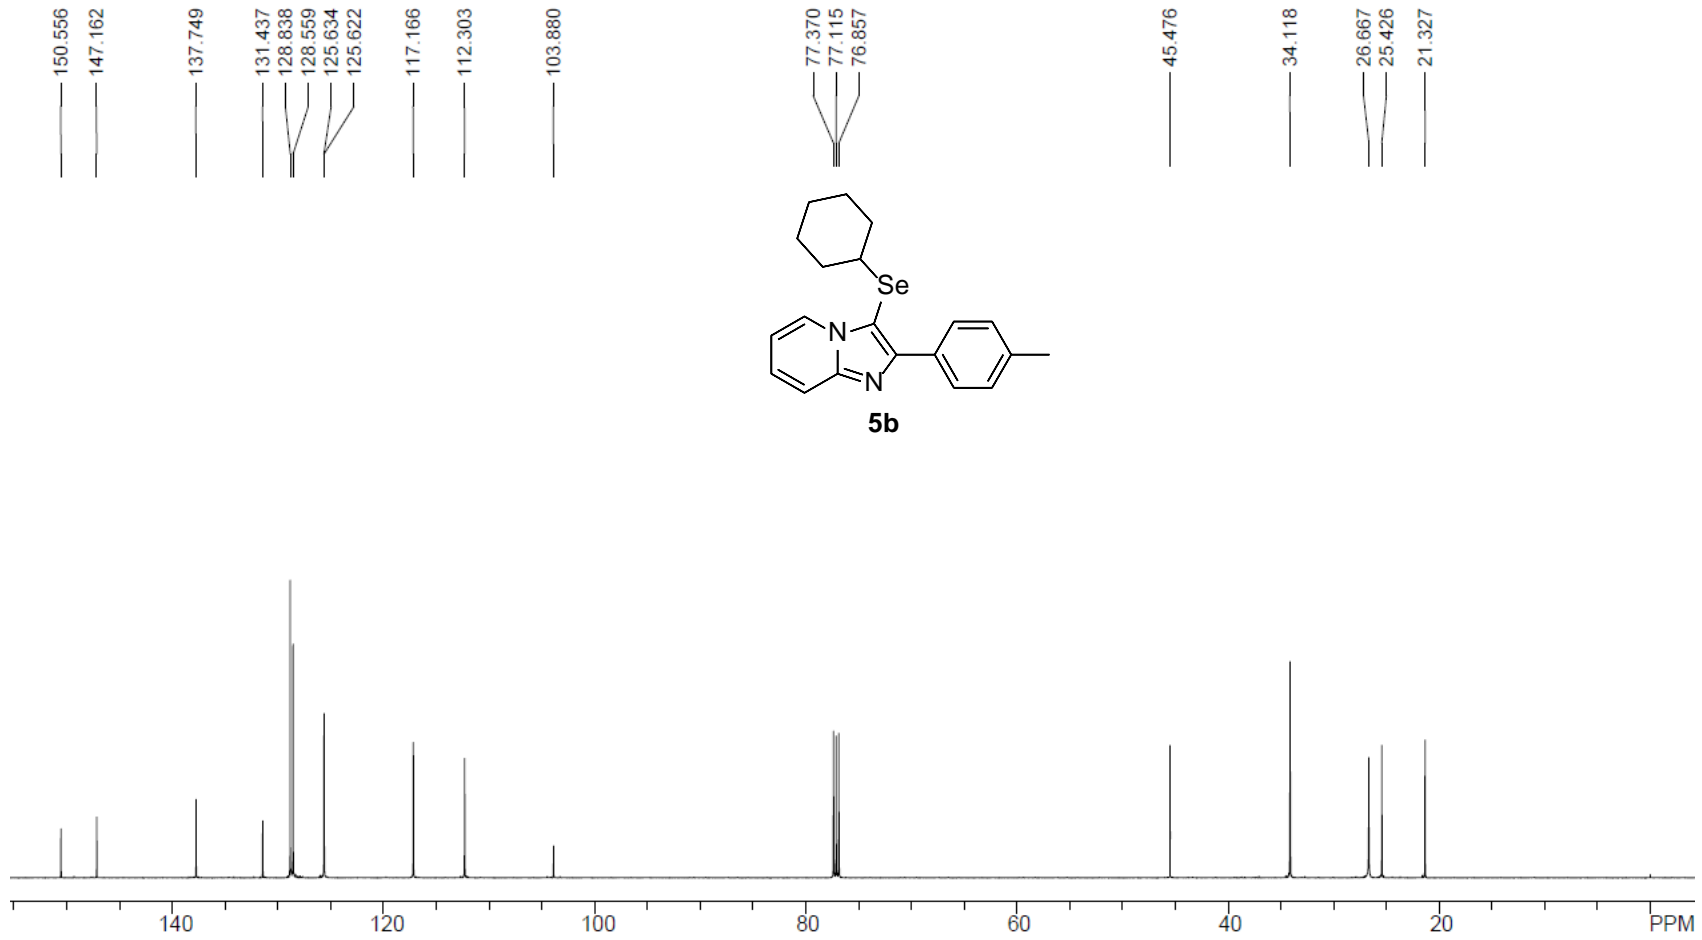

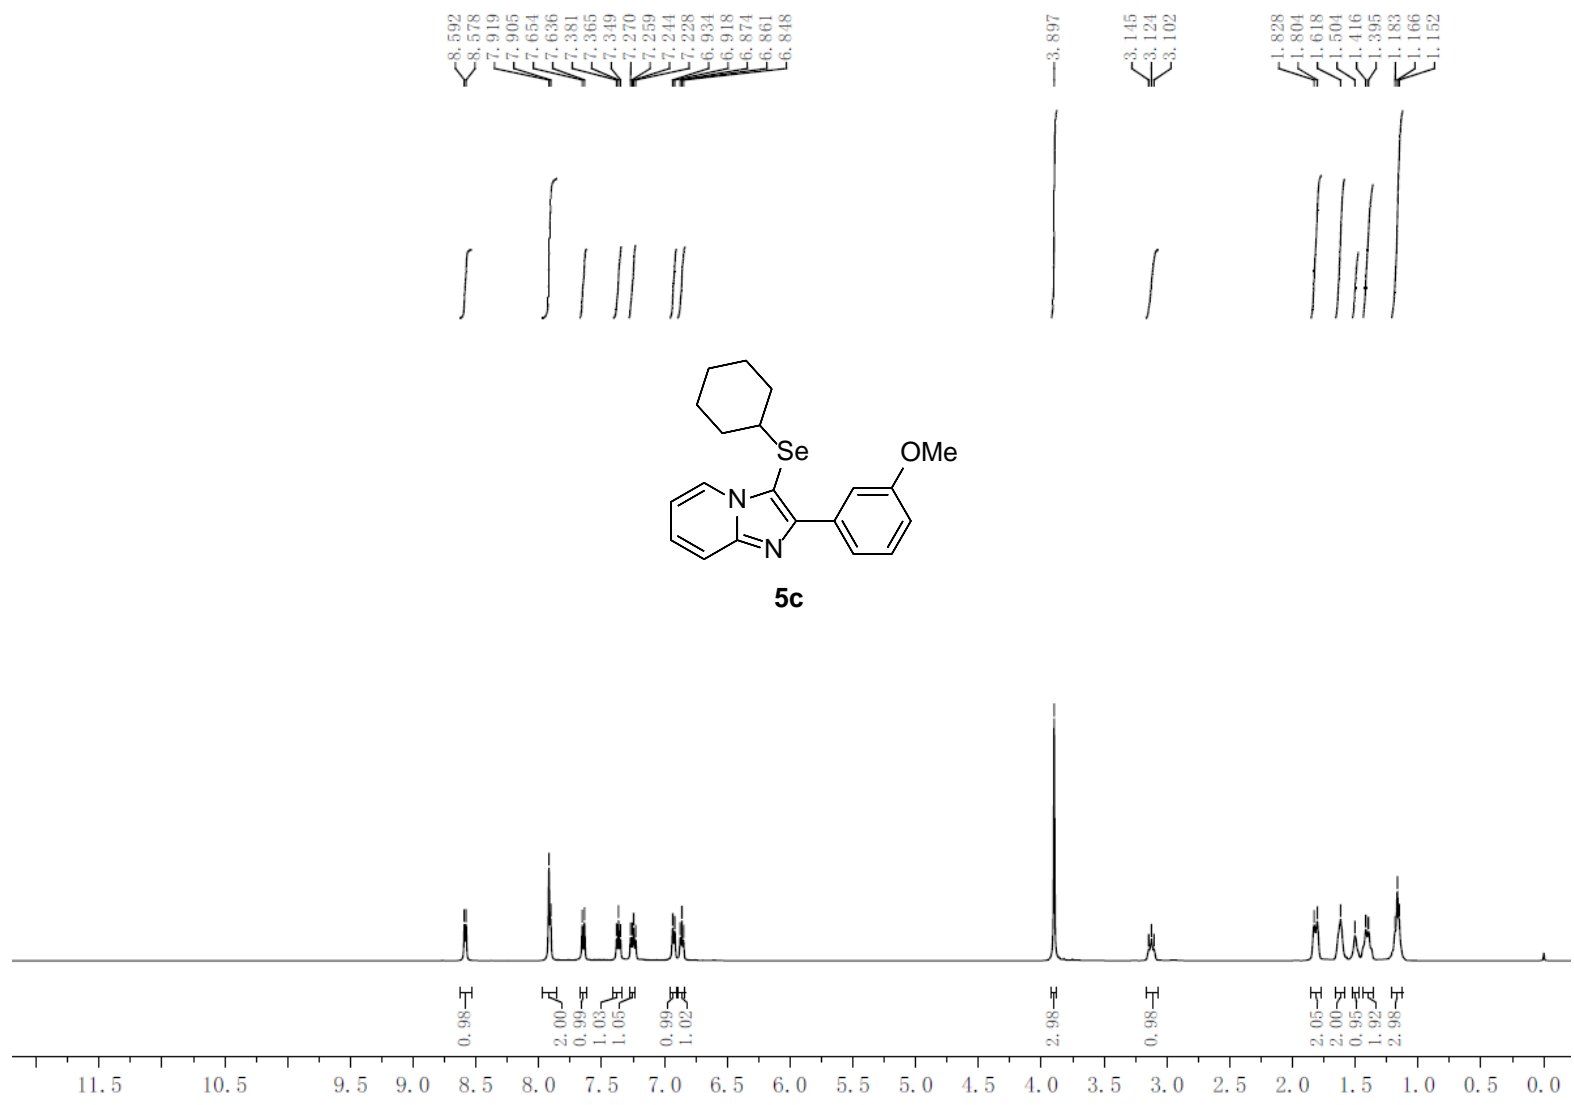

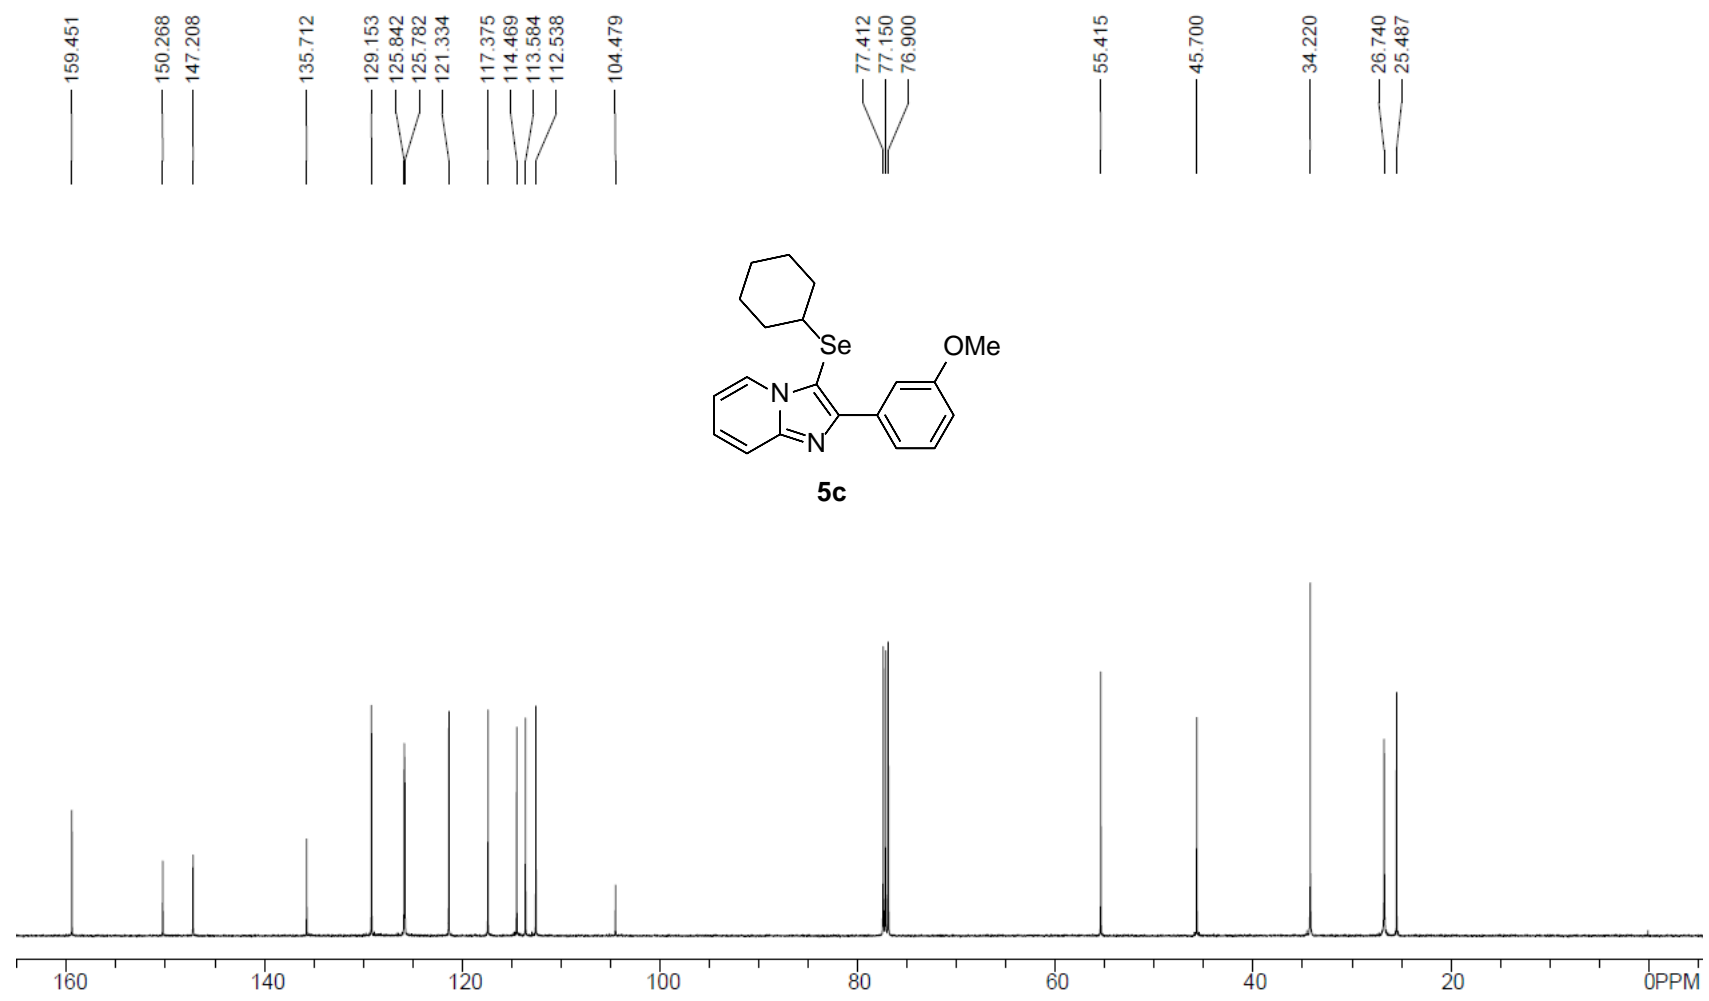

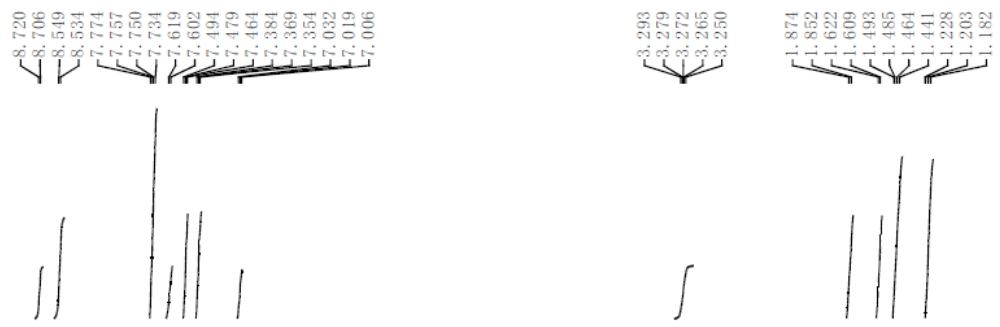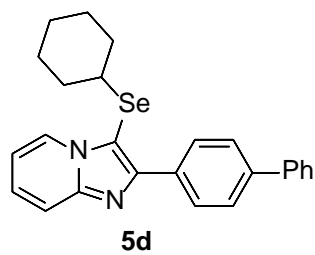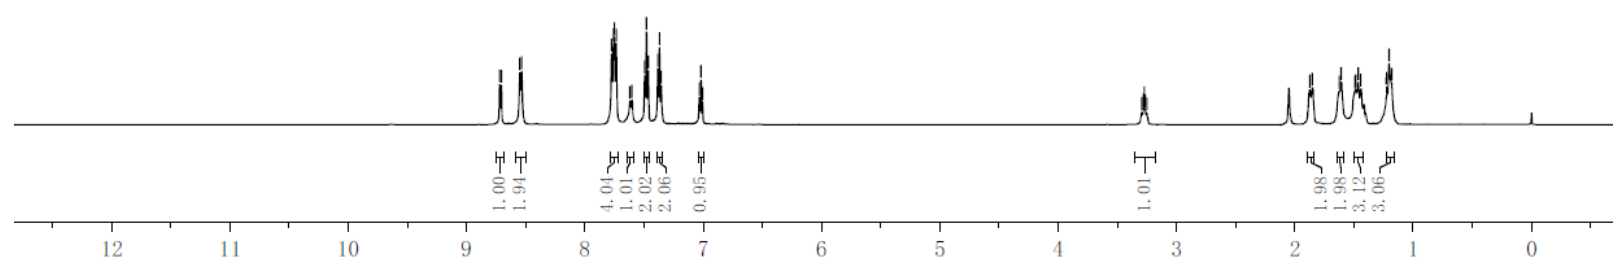

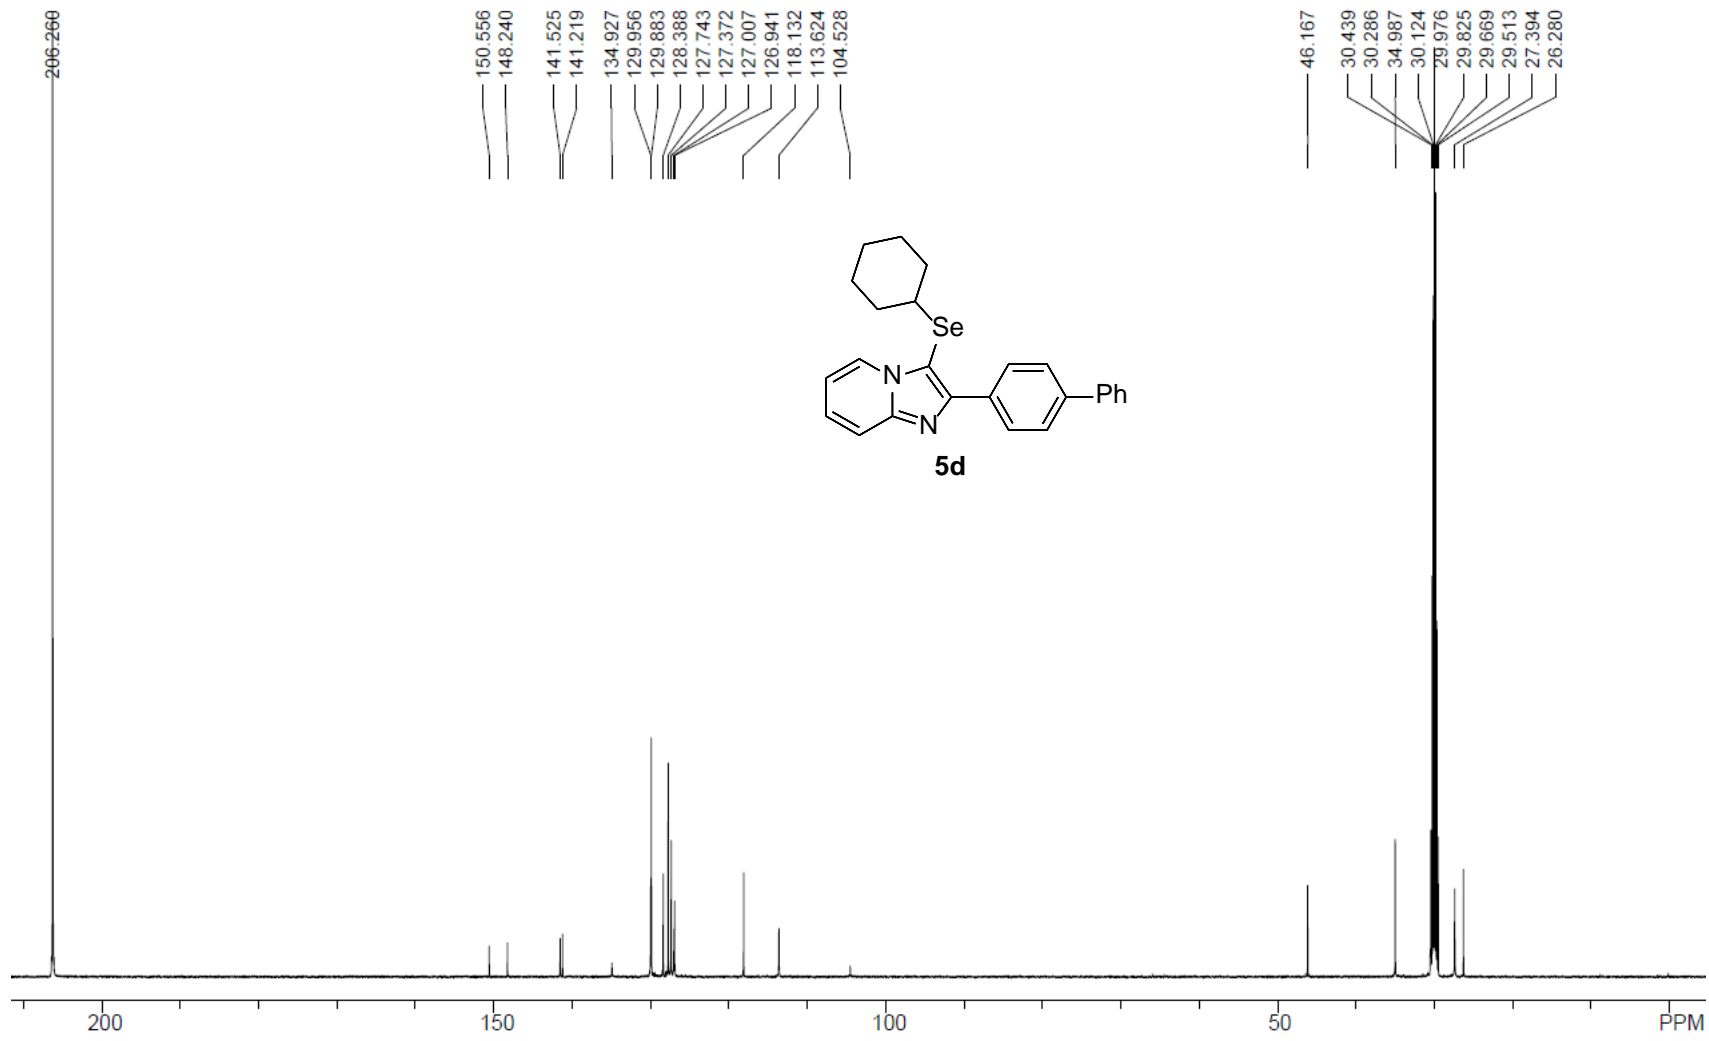

8.600  
8.583  
8.498  
8.476  
7.739  
7.718  
7.661  
7.639  
7.327  
7.324  
7.307  
7.302  
7.285  
6.943  
6.941  
6.926  
6.909

3.161  
3.151  
3.142  
3.134  
3.124  
3.115  
3.107  
3.097  
3.088  
1.818  
1.791  
1.786  
1.647  
1.635  
1.624  
1.613  
1.549  
1.522  
1.487  
1.423  
1.397  
1.372  
1.347  
1.340  
1.203  
1.180

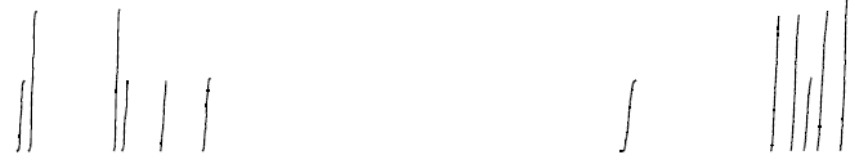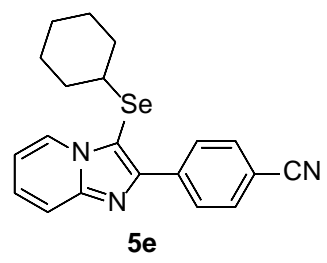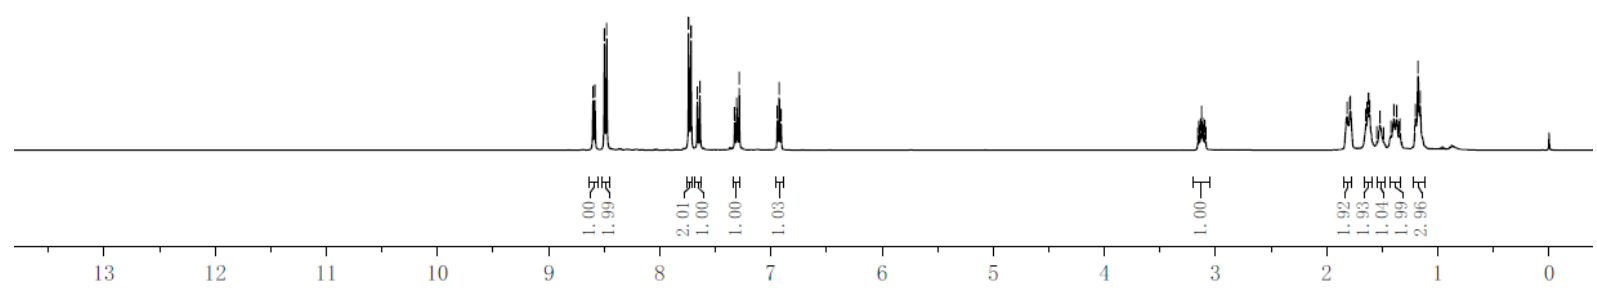

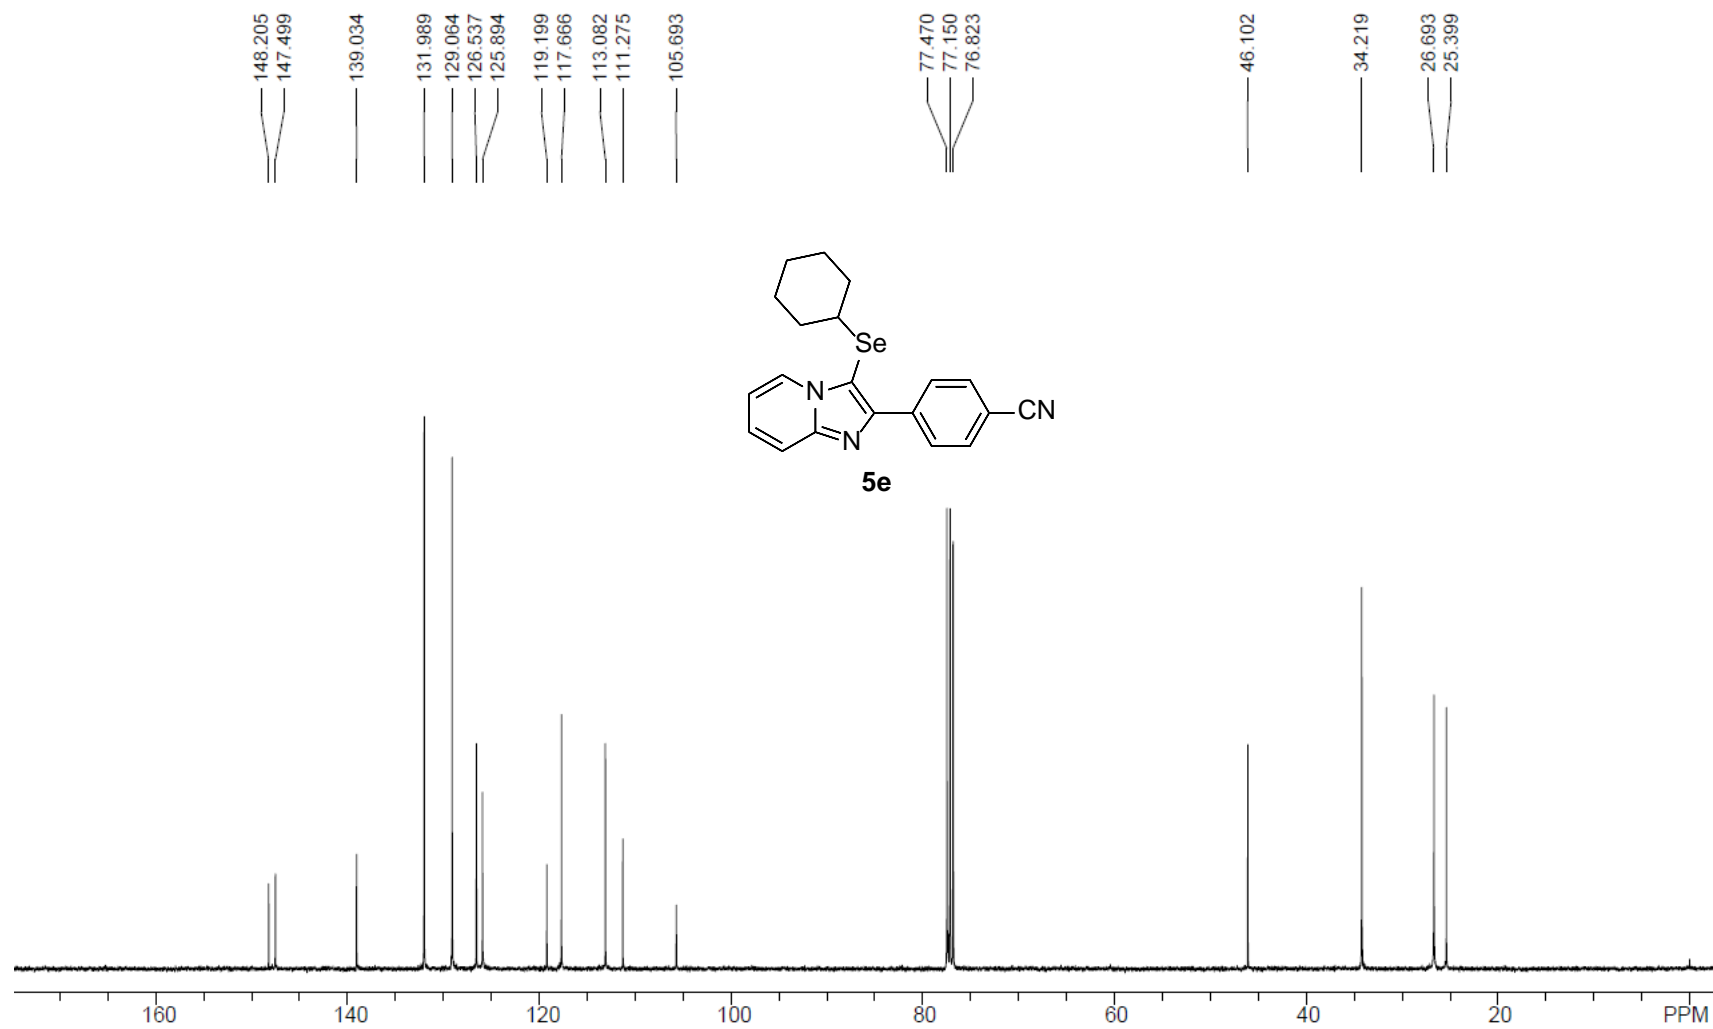

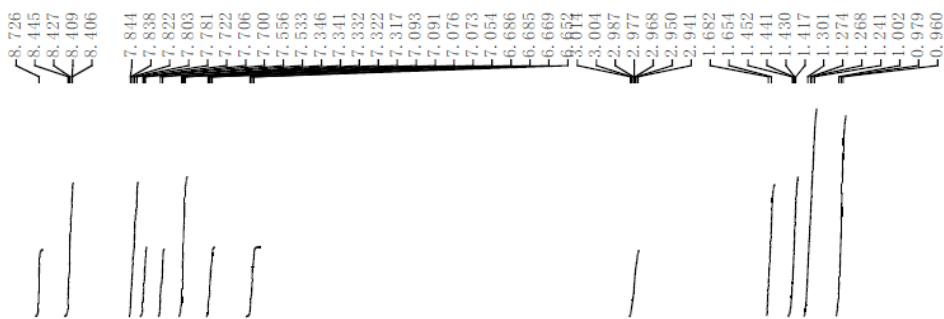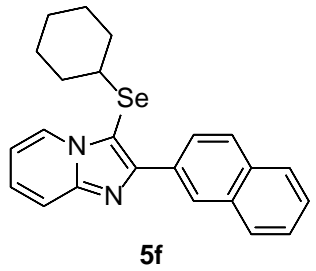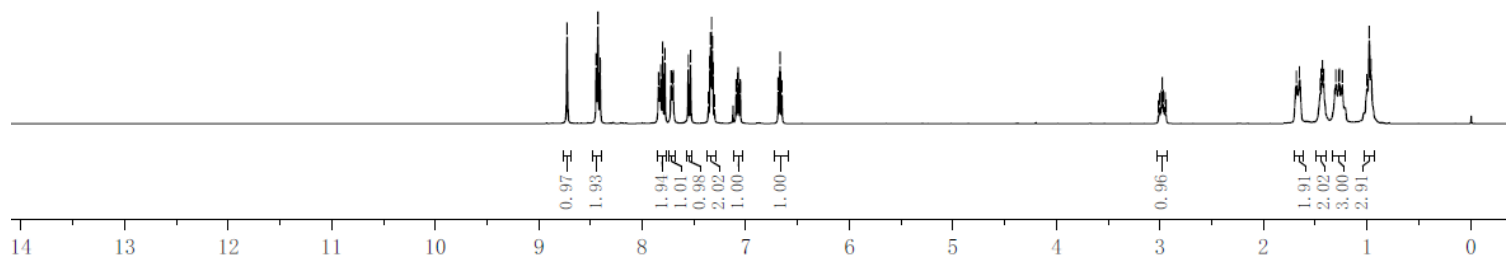



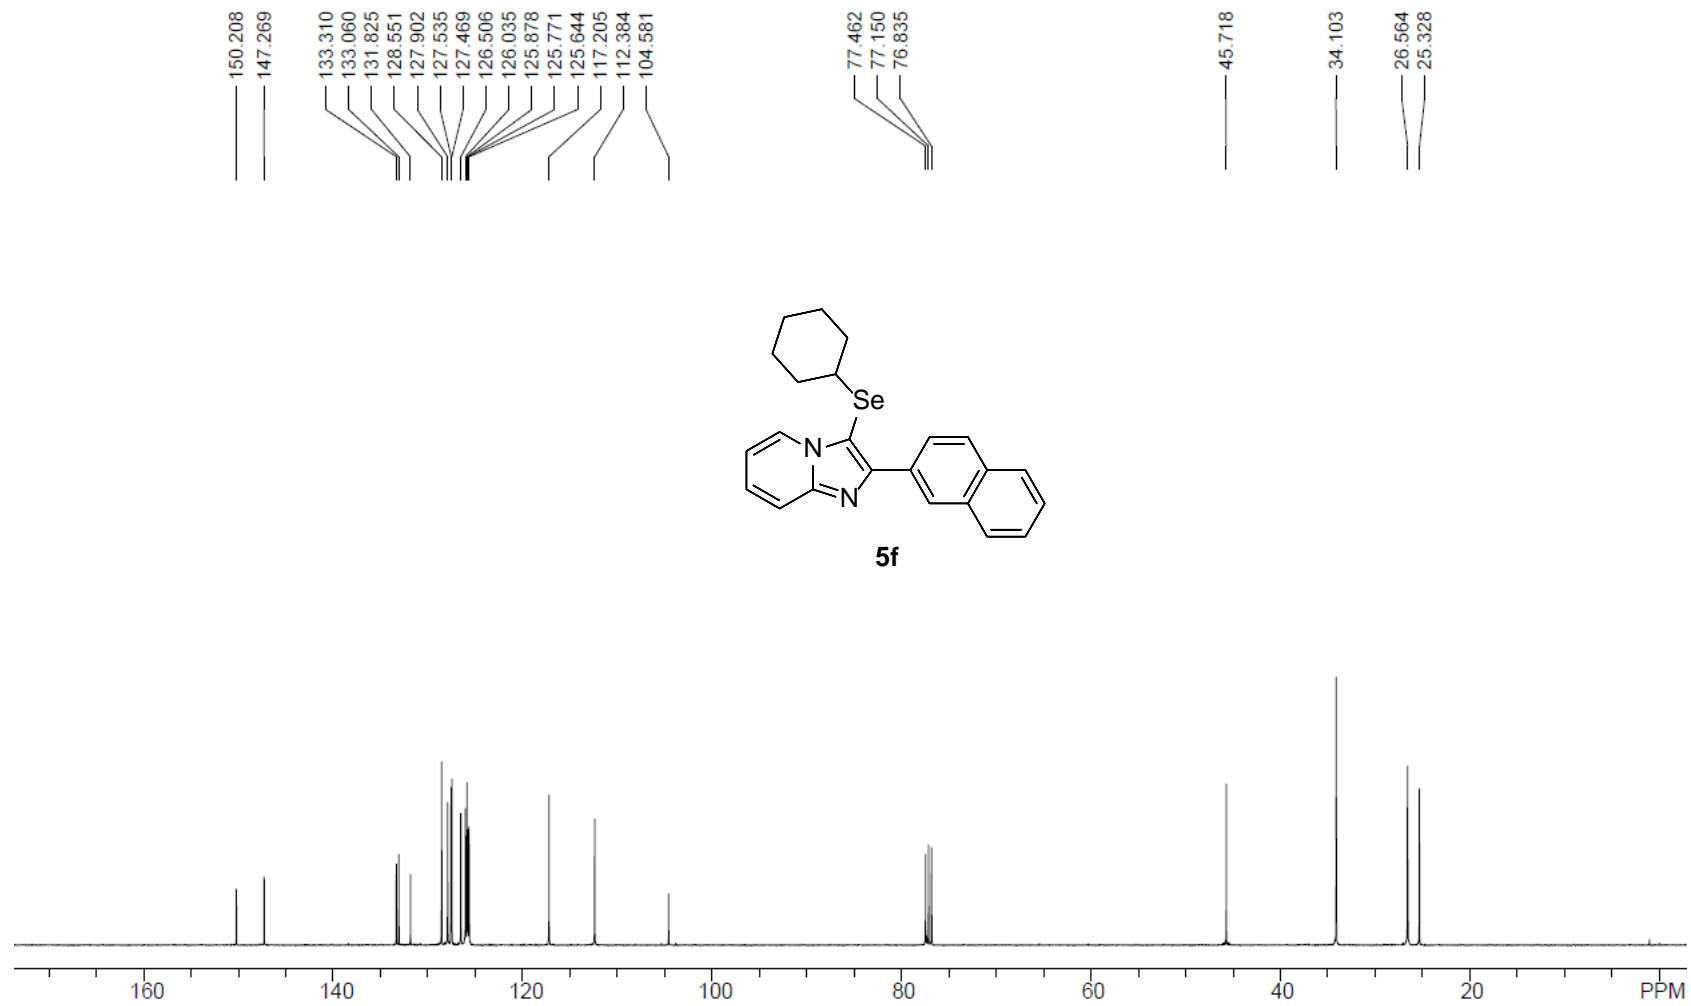

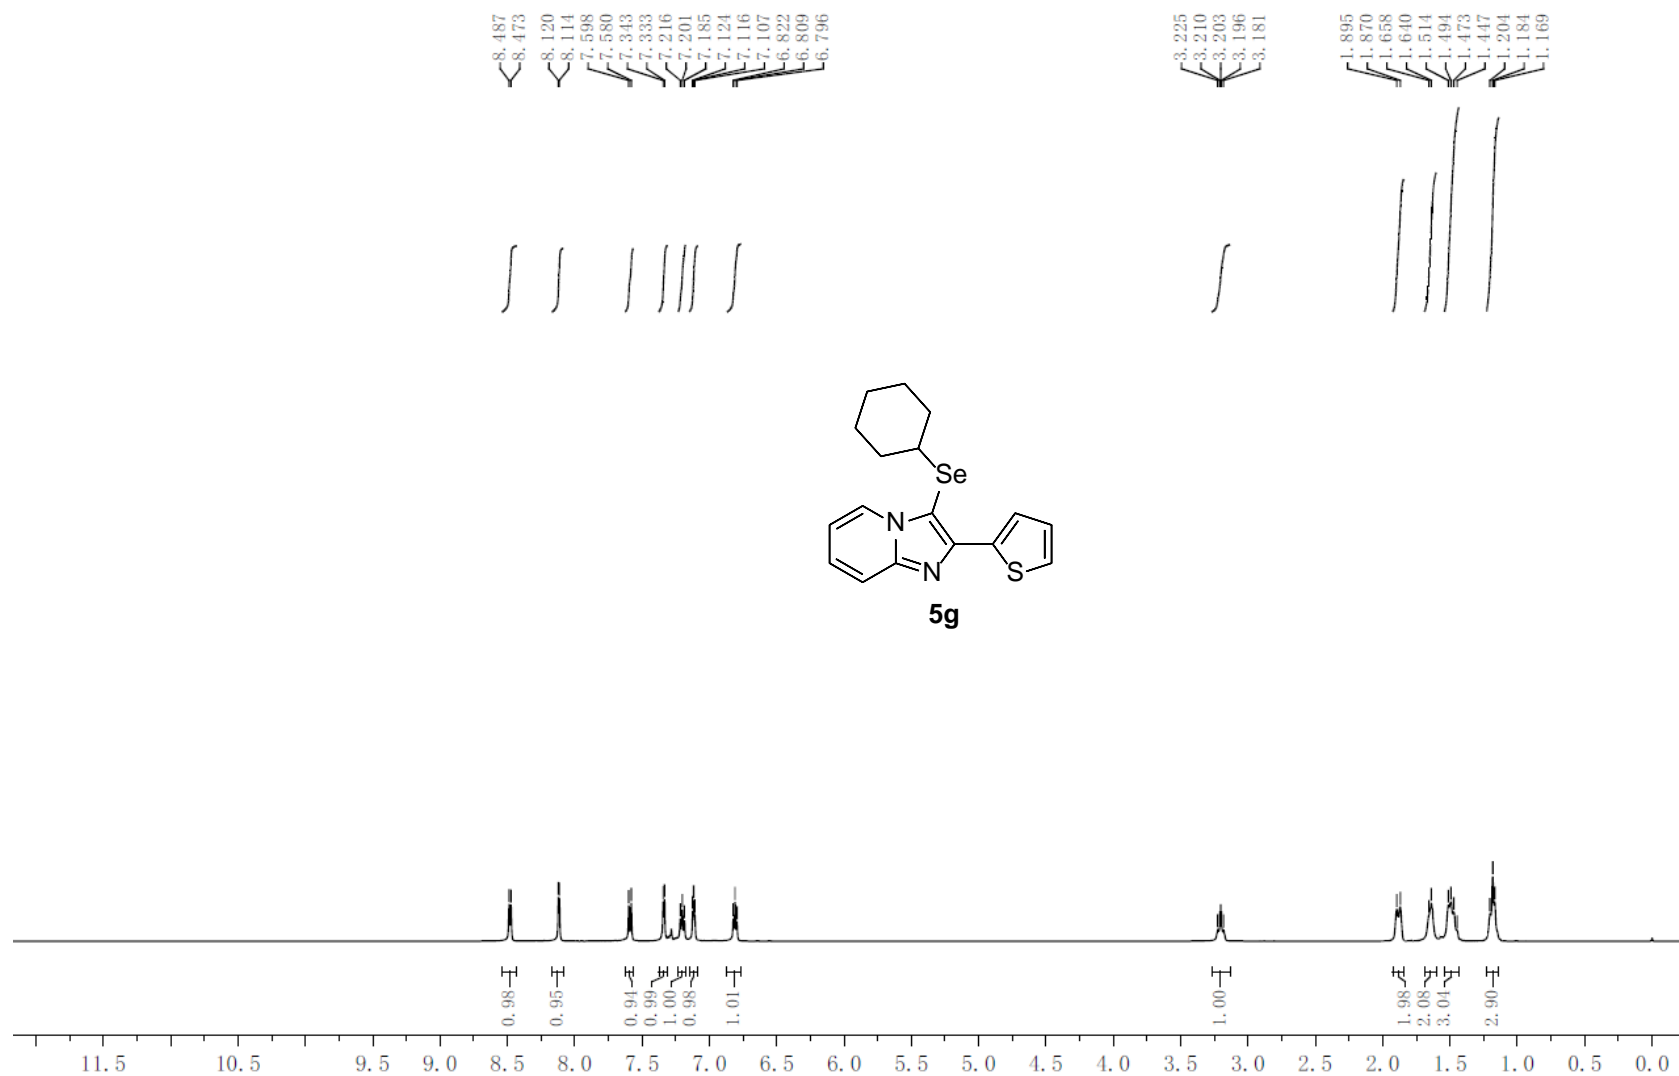

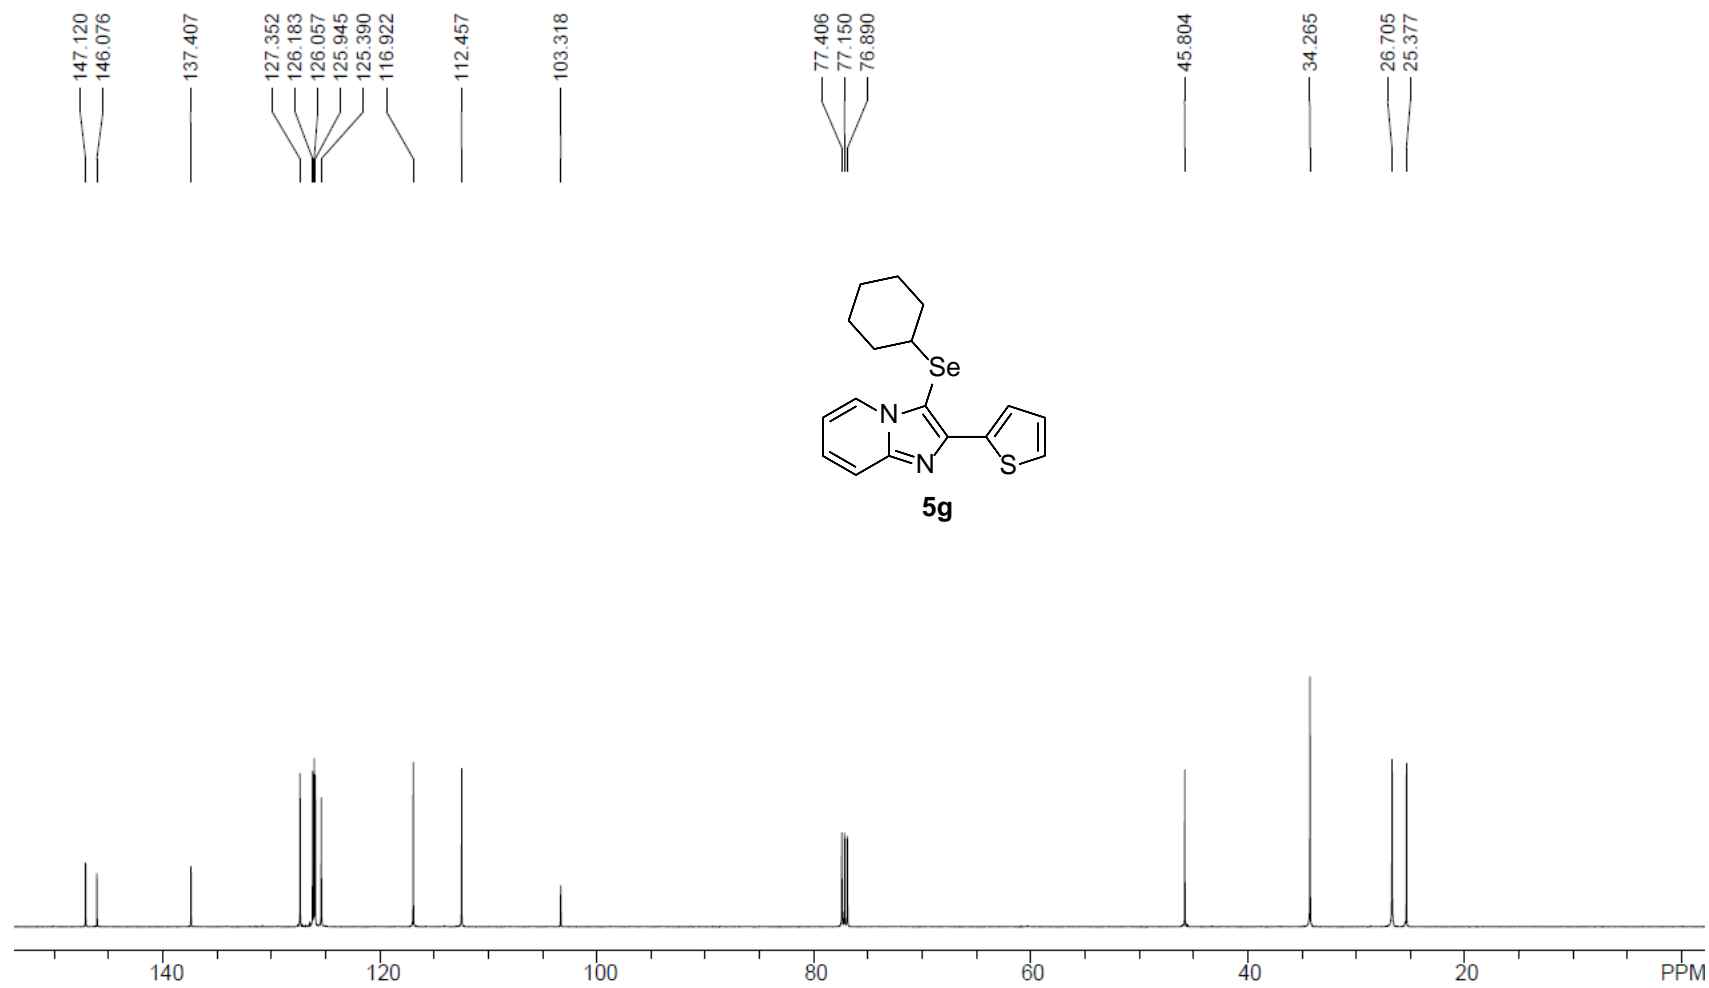

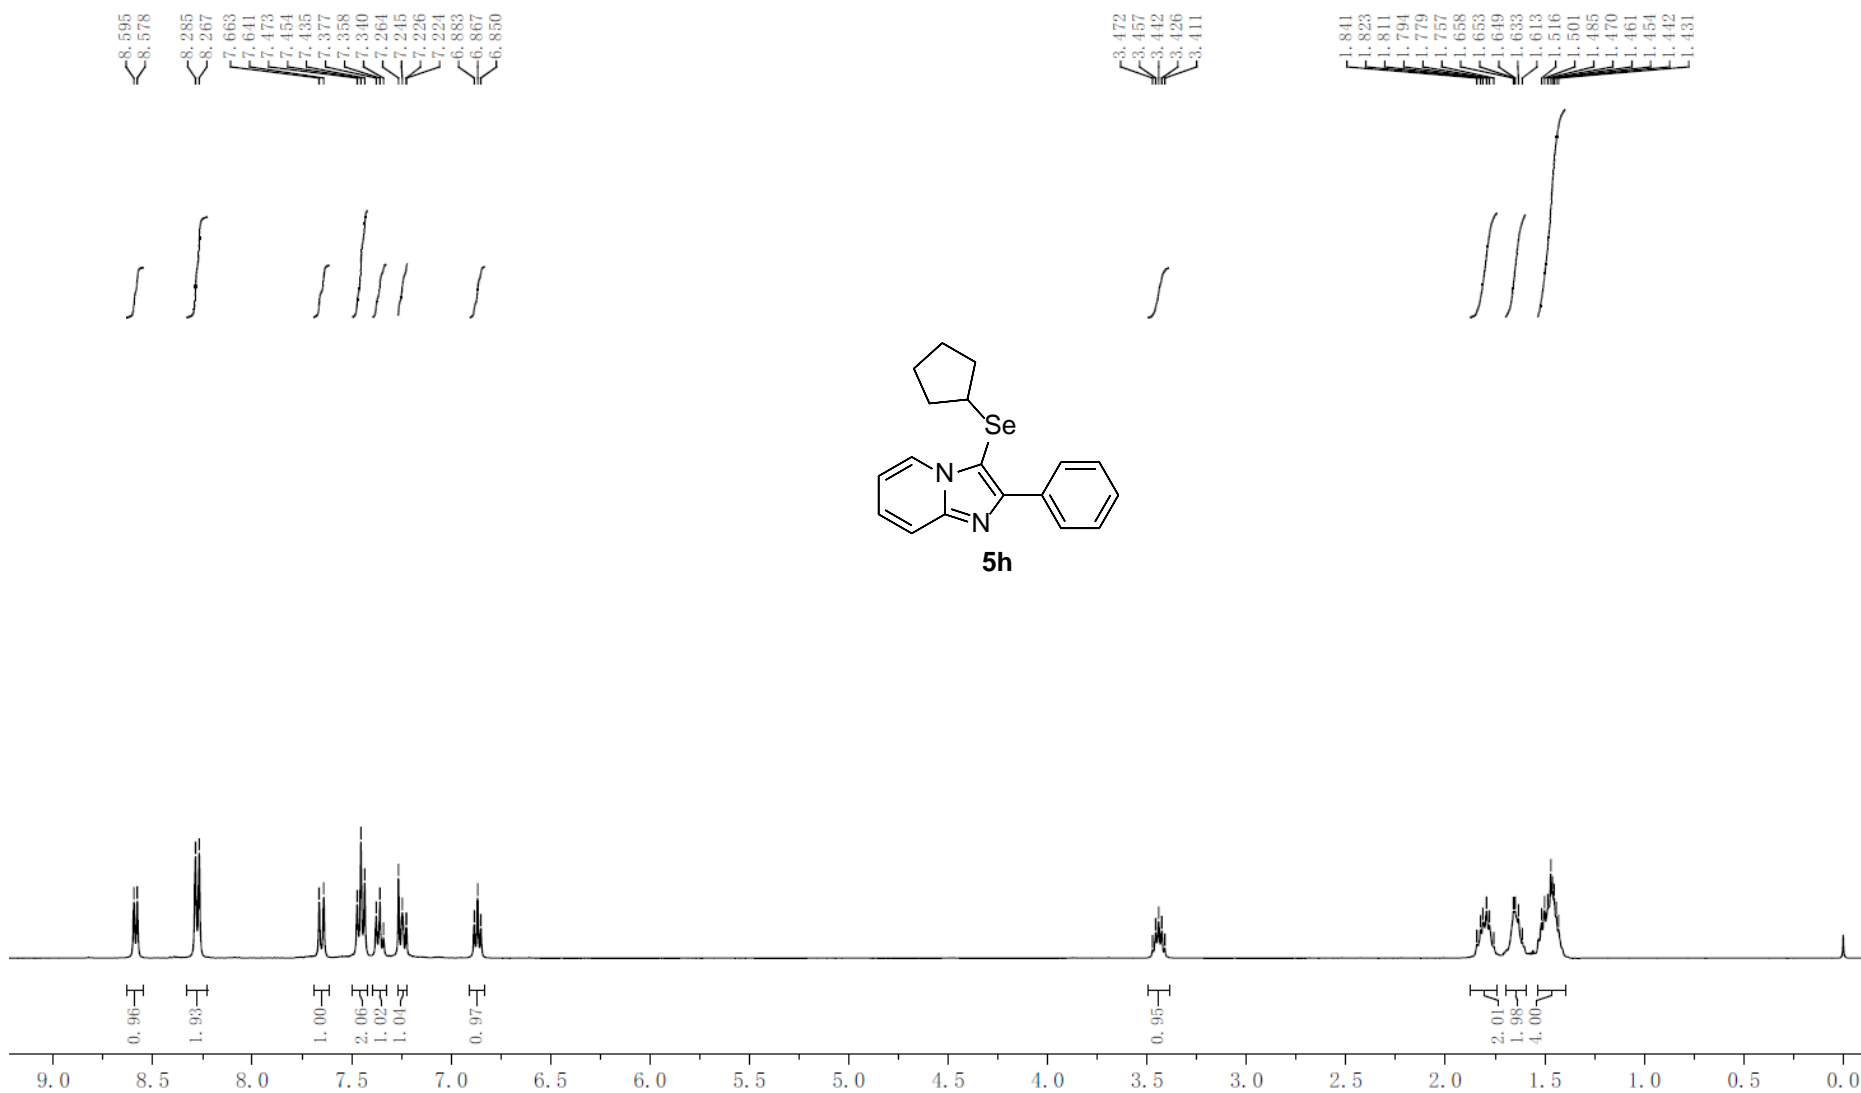

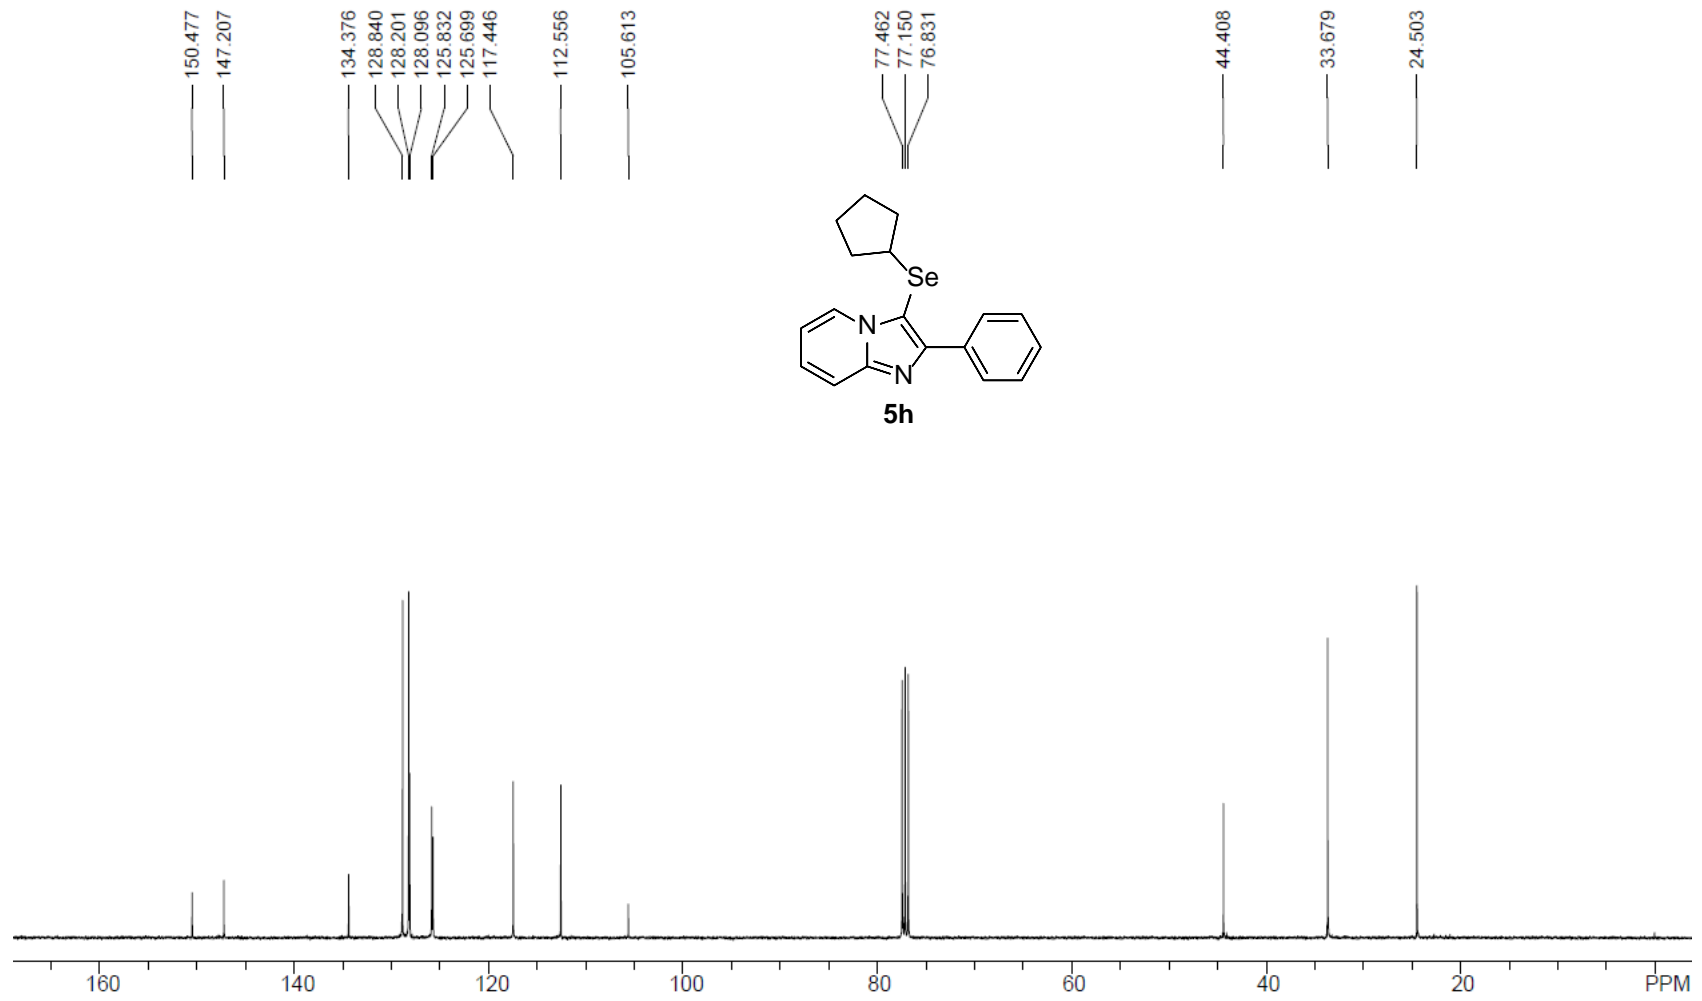

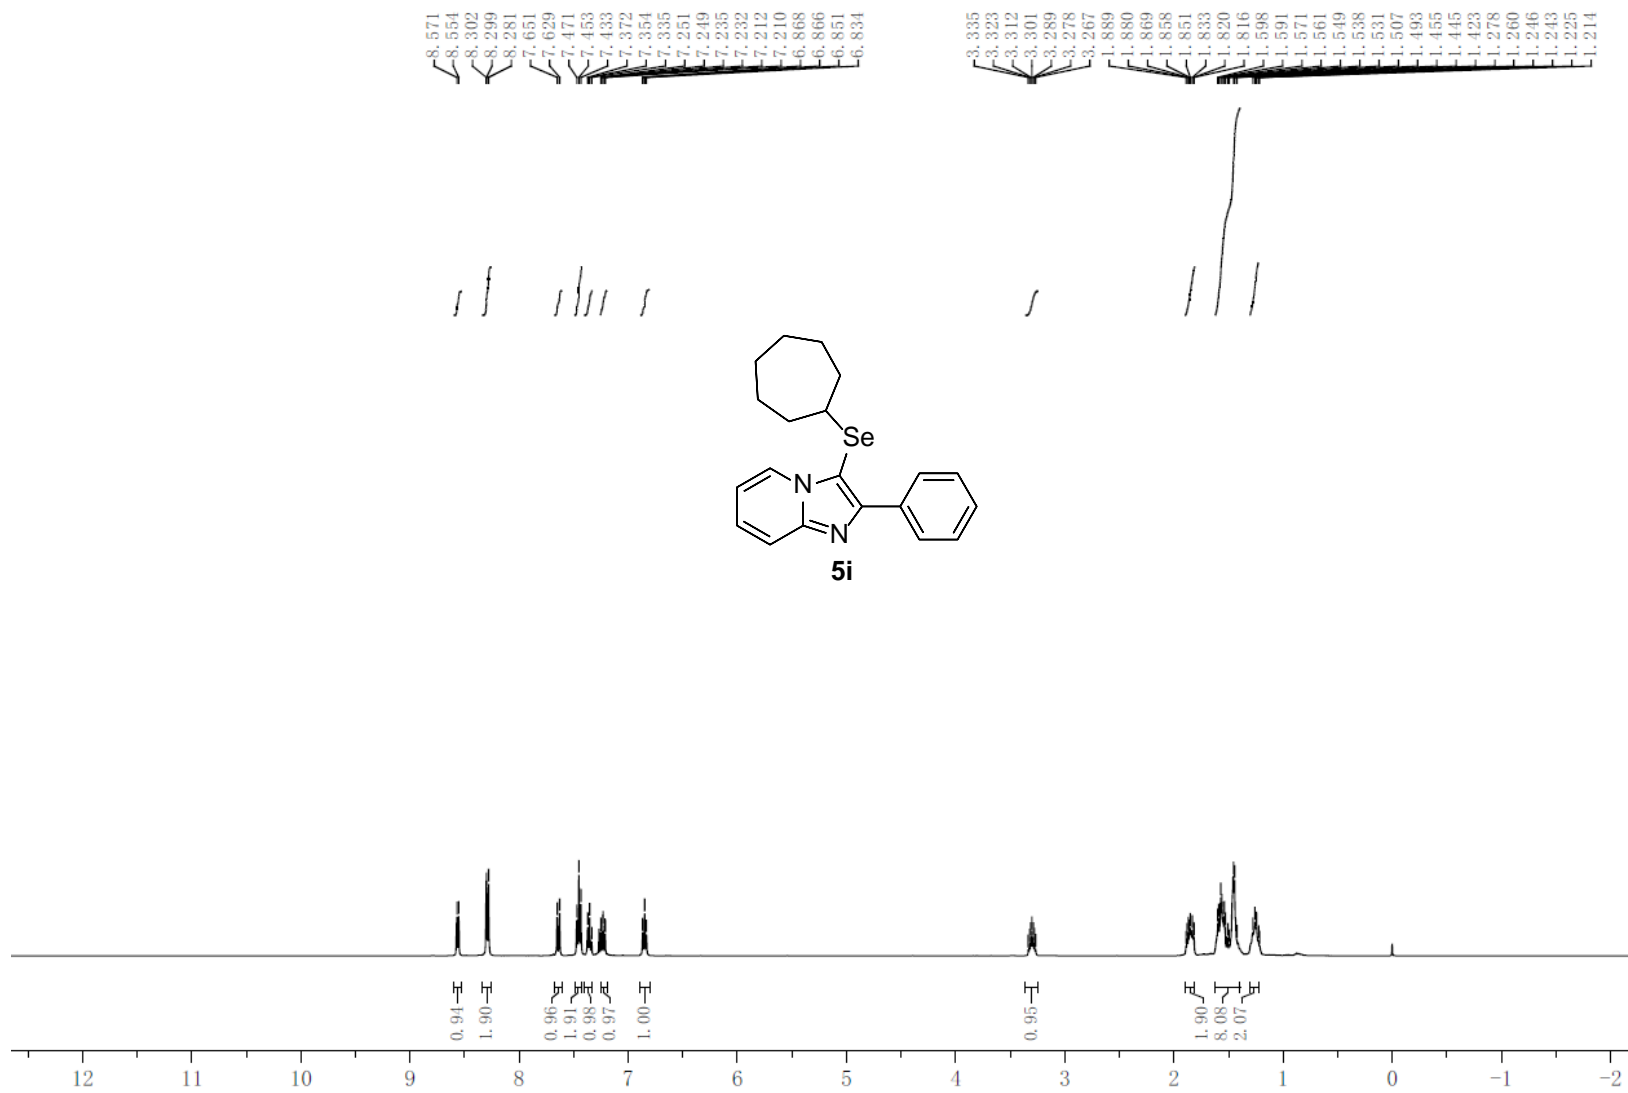

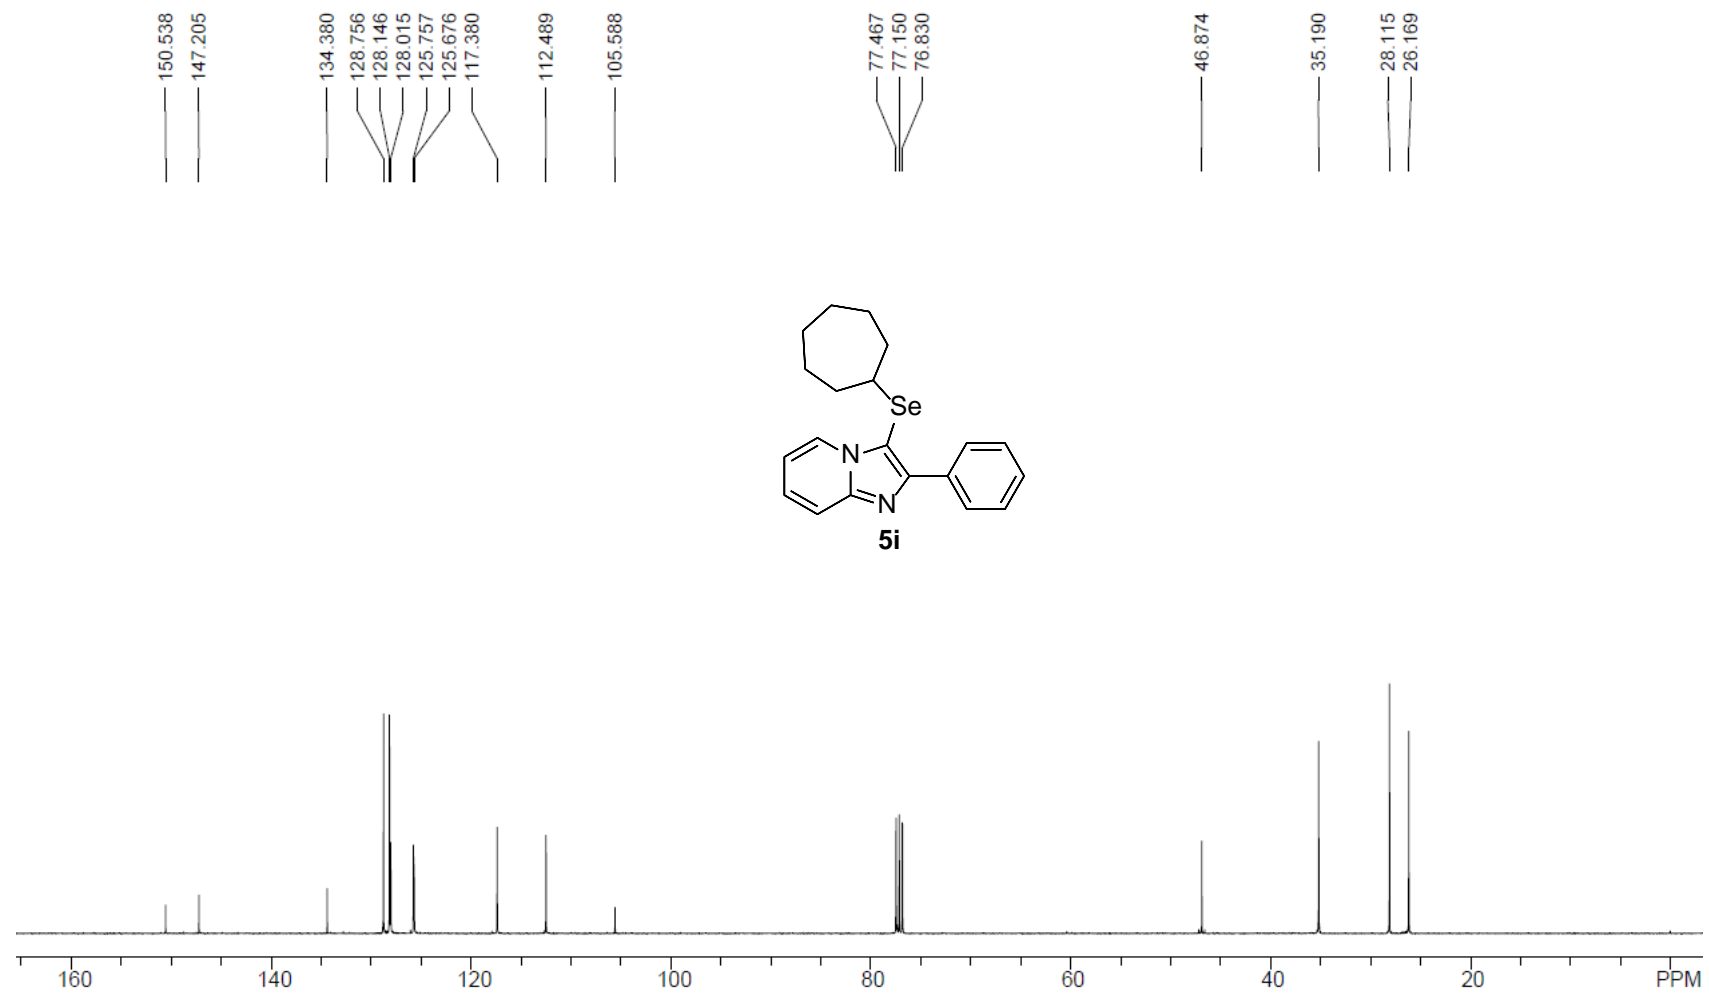

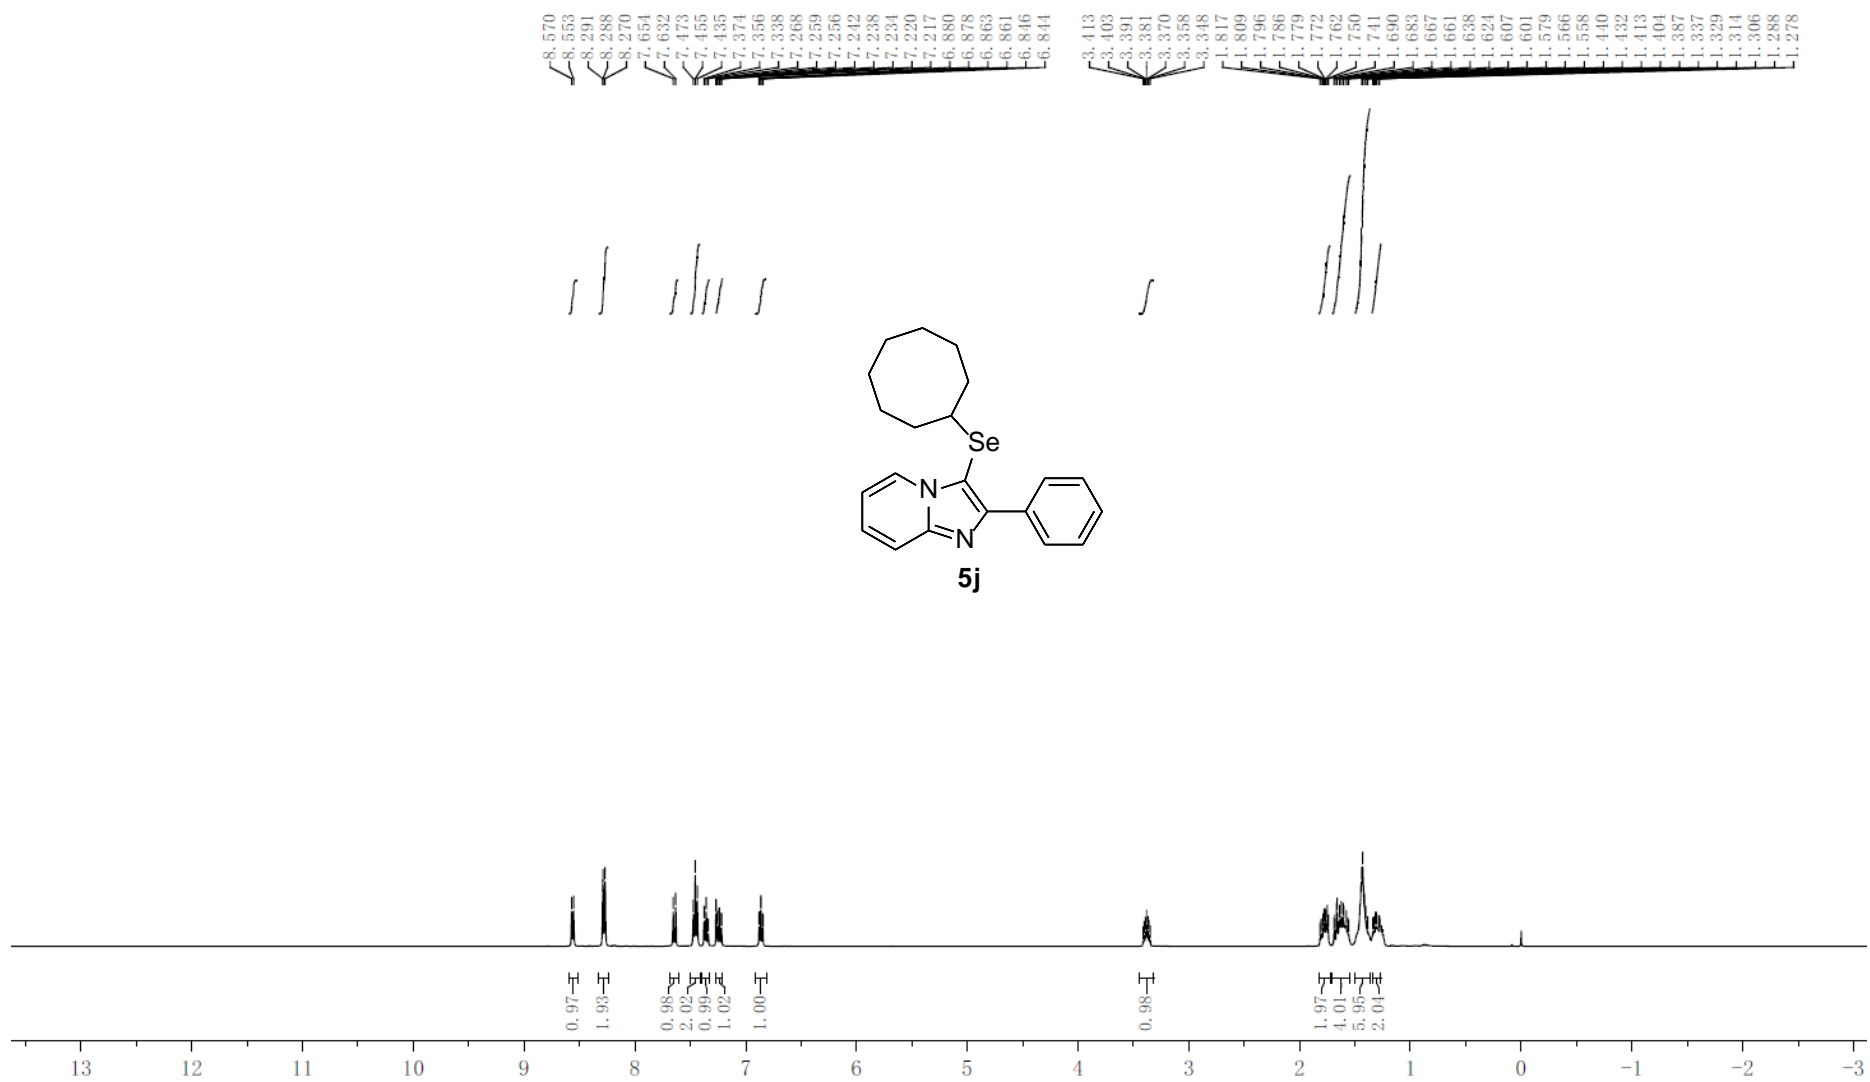



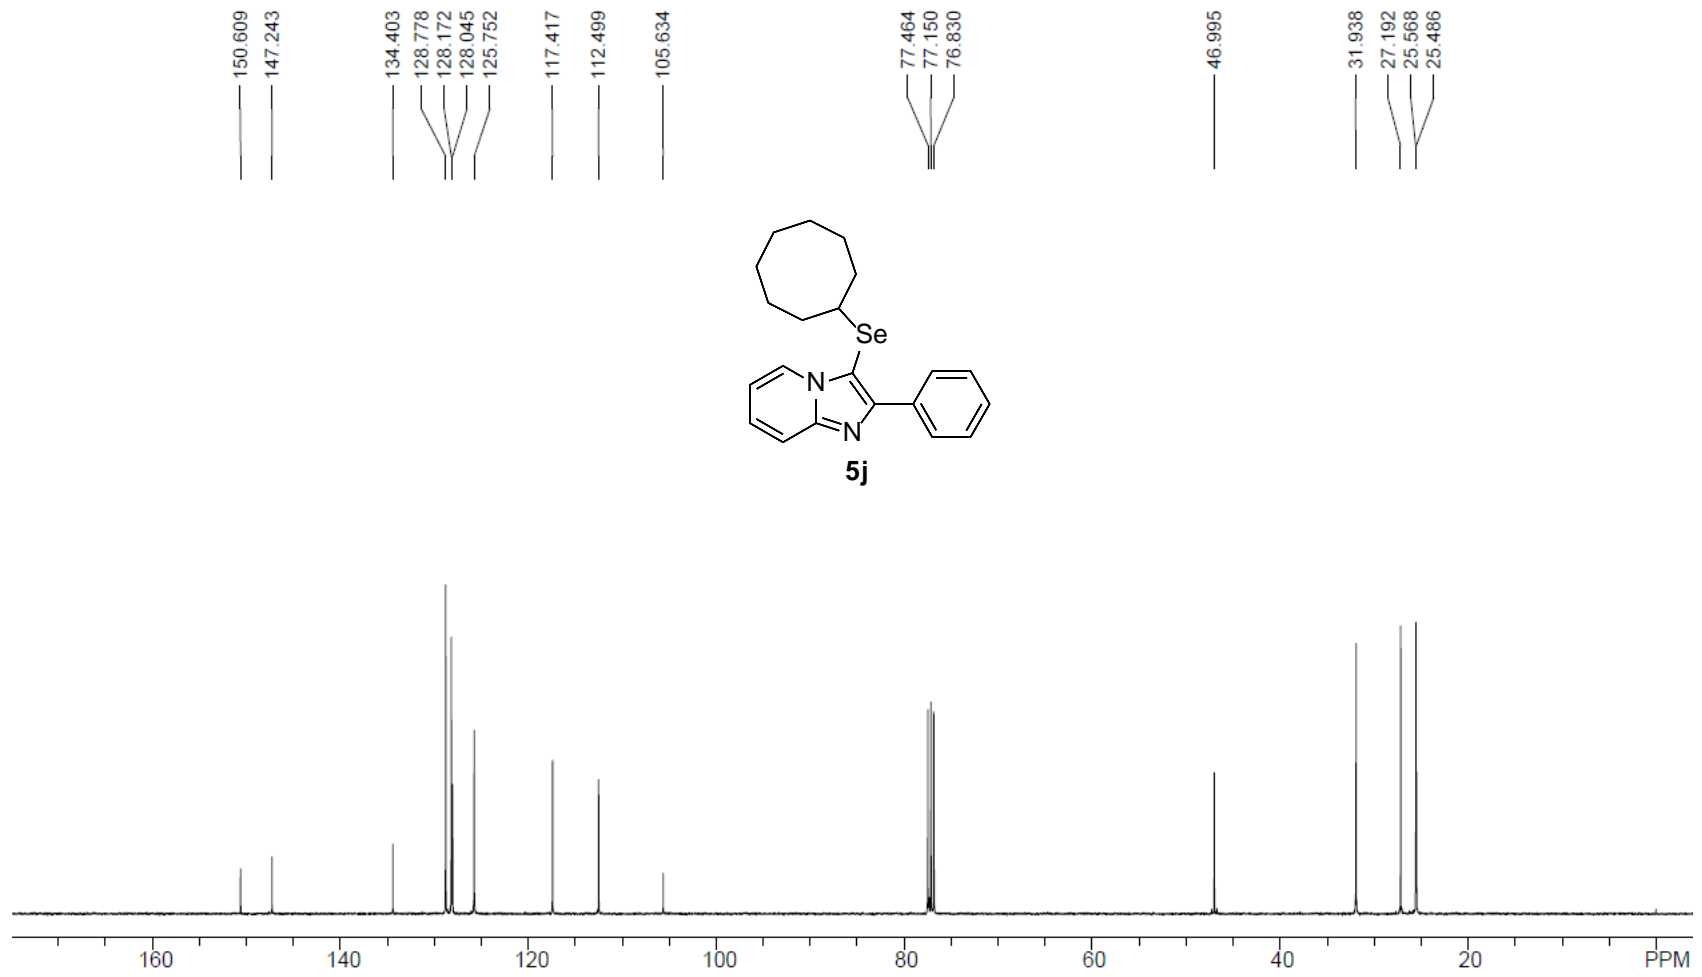

Supplement: c9qo00198k1.pdf [file c9qo00198k1.pdf]
